# Supplementary material for: NAFLD risk alleles in PNPLA3, TM6SF2, GCKR and LYPLAL1 show divergent metabolic effects
Source: PubMed Central journal article supplement — Hum Mol Genet. 2018 Apr 10;27(12):2214–23. doi: 10.1093/hmg/ddy124 (PMC5985737; doi:10.1093/hmg/ddy124), 2018-04-10
Supplement: ddy124_supplement.pdf [file ddy124_supplement.pdf]

# NAFLD risk alleles in *PNPLA3*, *TM6SF2*, *GCKR*, and *LYPLAL1* show divergent metabolic effects

Eeva Sliz, Sylvain Sebert, Peter Würtz, Antti Kangas, Pasi Soininen, Terho Lehtimäki, Mika Kähönen, Jorma Viikari, Minna Männikkö, Mika Ala-Korpela, Olli Raitakari, and Johannes Kettunen

## Supplement

|                                                                                                                                                                                                         |           |
|---------------------------------------------------------------------------------------------------------------------------------------------------------------------------------------------------------|-----------|
| <b>Fig S1. Correspondence of the metabolic effects of <i>GCKR</i> rs1260326-T with <i>GCKR</i> rs780094-T, and <i>TM6SF2</i> rs58542926-T with <i>NCAN</i> rs2228603-T</b>                              | <b>1</b>  |
| <b>Fig S2. Comparison of cross-sectional associations between fatty liver and 123 metabolic traits adjusted with sex and age, versus additional adjustment for alcohol consumption or BMI</b>           | <b>2</b>  |
| <b>Fig S3 A-C. Cross-sectional associations of fatty liver with all 123 metabolic traits, and the corresponding associations of the studied NAFLD risk alleles</b>                                      | <b>3</b>  |
| <b>Fig S4. The overall match between the metabolic effects of the NAFLD risk alleles <i>GCKR</i> rs1260326-T, <i>LYPLAL1</i> rs12137855-C, <i>PNPLA3</i> rs738409-G, and <i>TM6SF2</i> rs58542926-T</b> | <b>6</b>  |
| <b>Fig S5. Cluster analysis of the 123 metabolic traits</b>                                                                                                                                             | <b>7</b>  |
| <b>Fig S6. Correlations of the metabolic effects using the 29 metabolic measures obtained in cluster analysis</b>                                                                                       | <b>8</b>  |
| <b>Table S1. NMR based metabolic traits</b>                                                                                                                                                             | <b>9</b>  |
| <b>Table S2. Fatty liver associations with circulating metabolic traits</b>                                                                                                                             | <b>13</b> |
| <b>Table S3. NAFLD risk allele associations with circulating metabolic traits</b>                                                                                                                       | <b>17</b> |

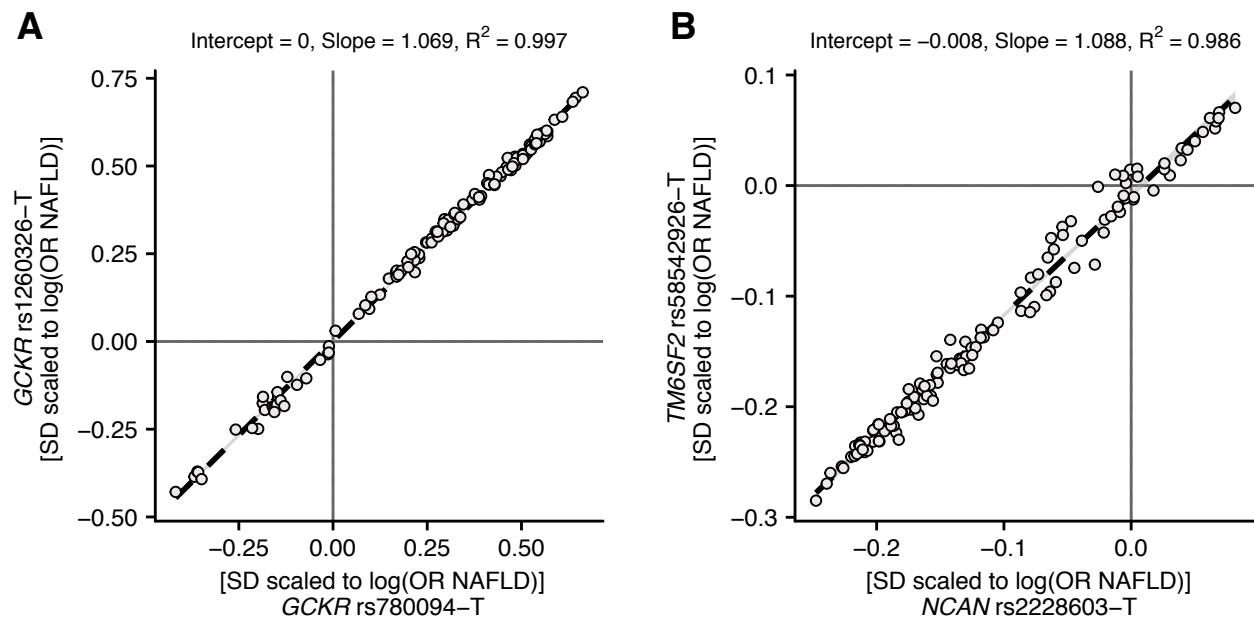

**Fig S1. Correspondence of the metabolic effects of *GCKR* rs1260326-T with *GCKR* rs780094-T, and *TM6SF2* rs58542926-T with *NCAN* rs2228603-T.** The dashed line shows the highly matching effects between the genotypes at the two loci associated with NAFLD risk.

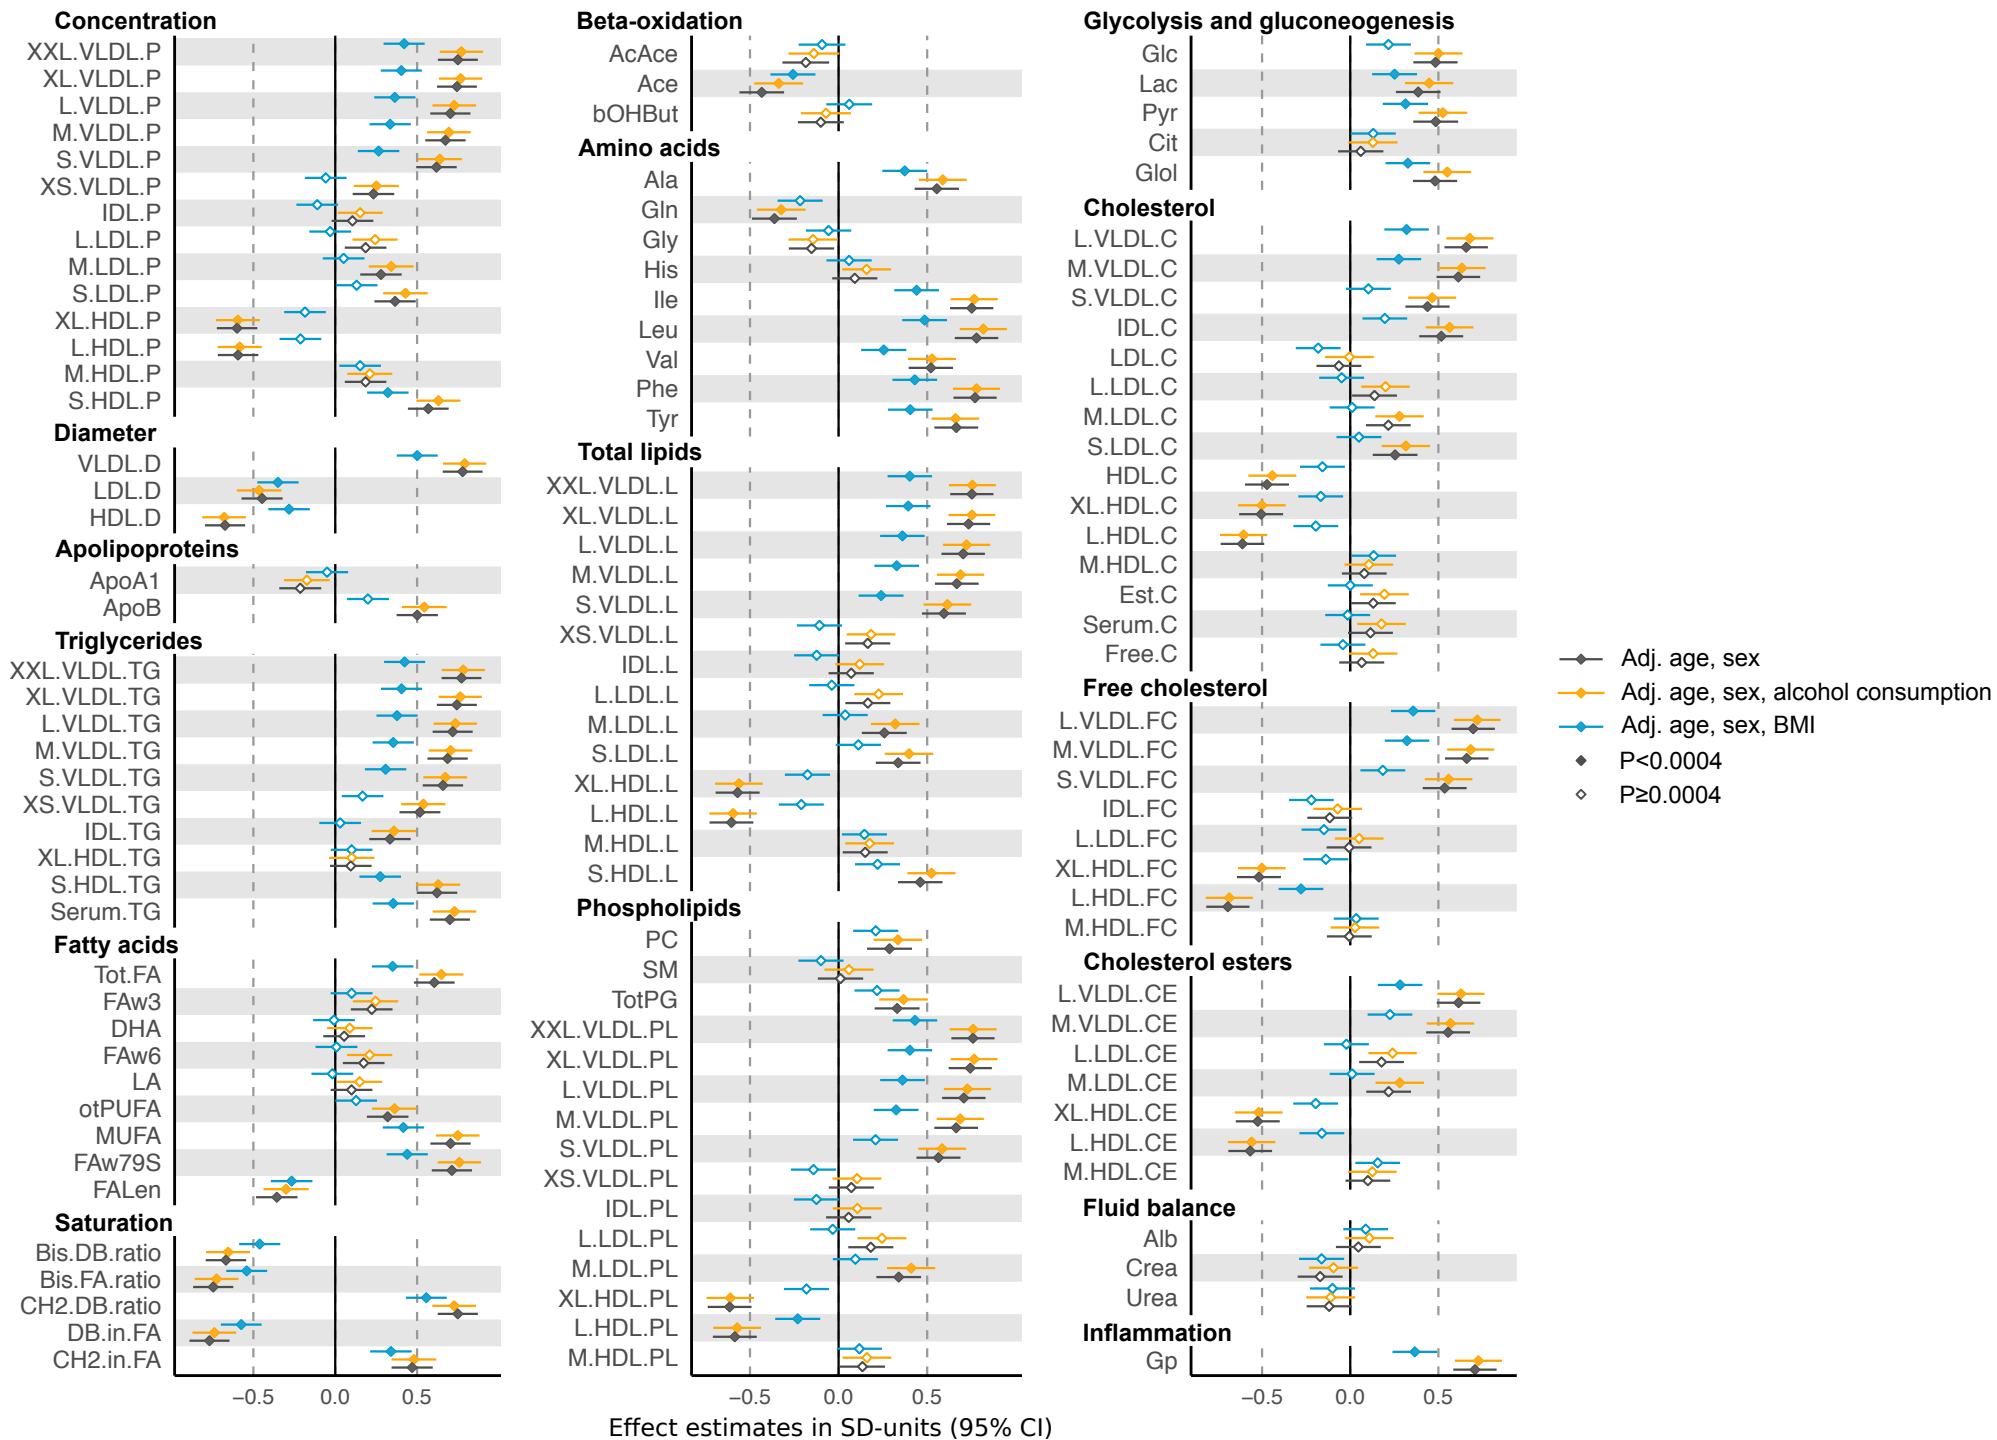

**Fig S2. Comparison of cross-sectional associations between fatty liver and 123 metabolic traits adjusted with sex and age, versus additional adjustment for alcohol consumption or BMI.**

All metabolic traits were also adjusted for ten first genetic principal components. Biomarker abbreviations as in Table S1.

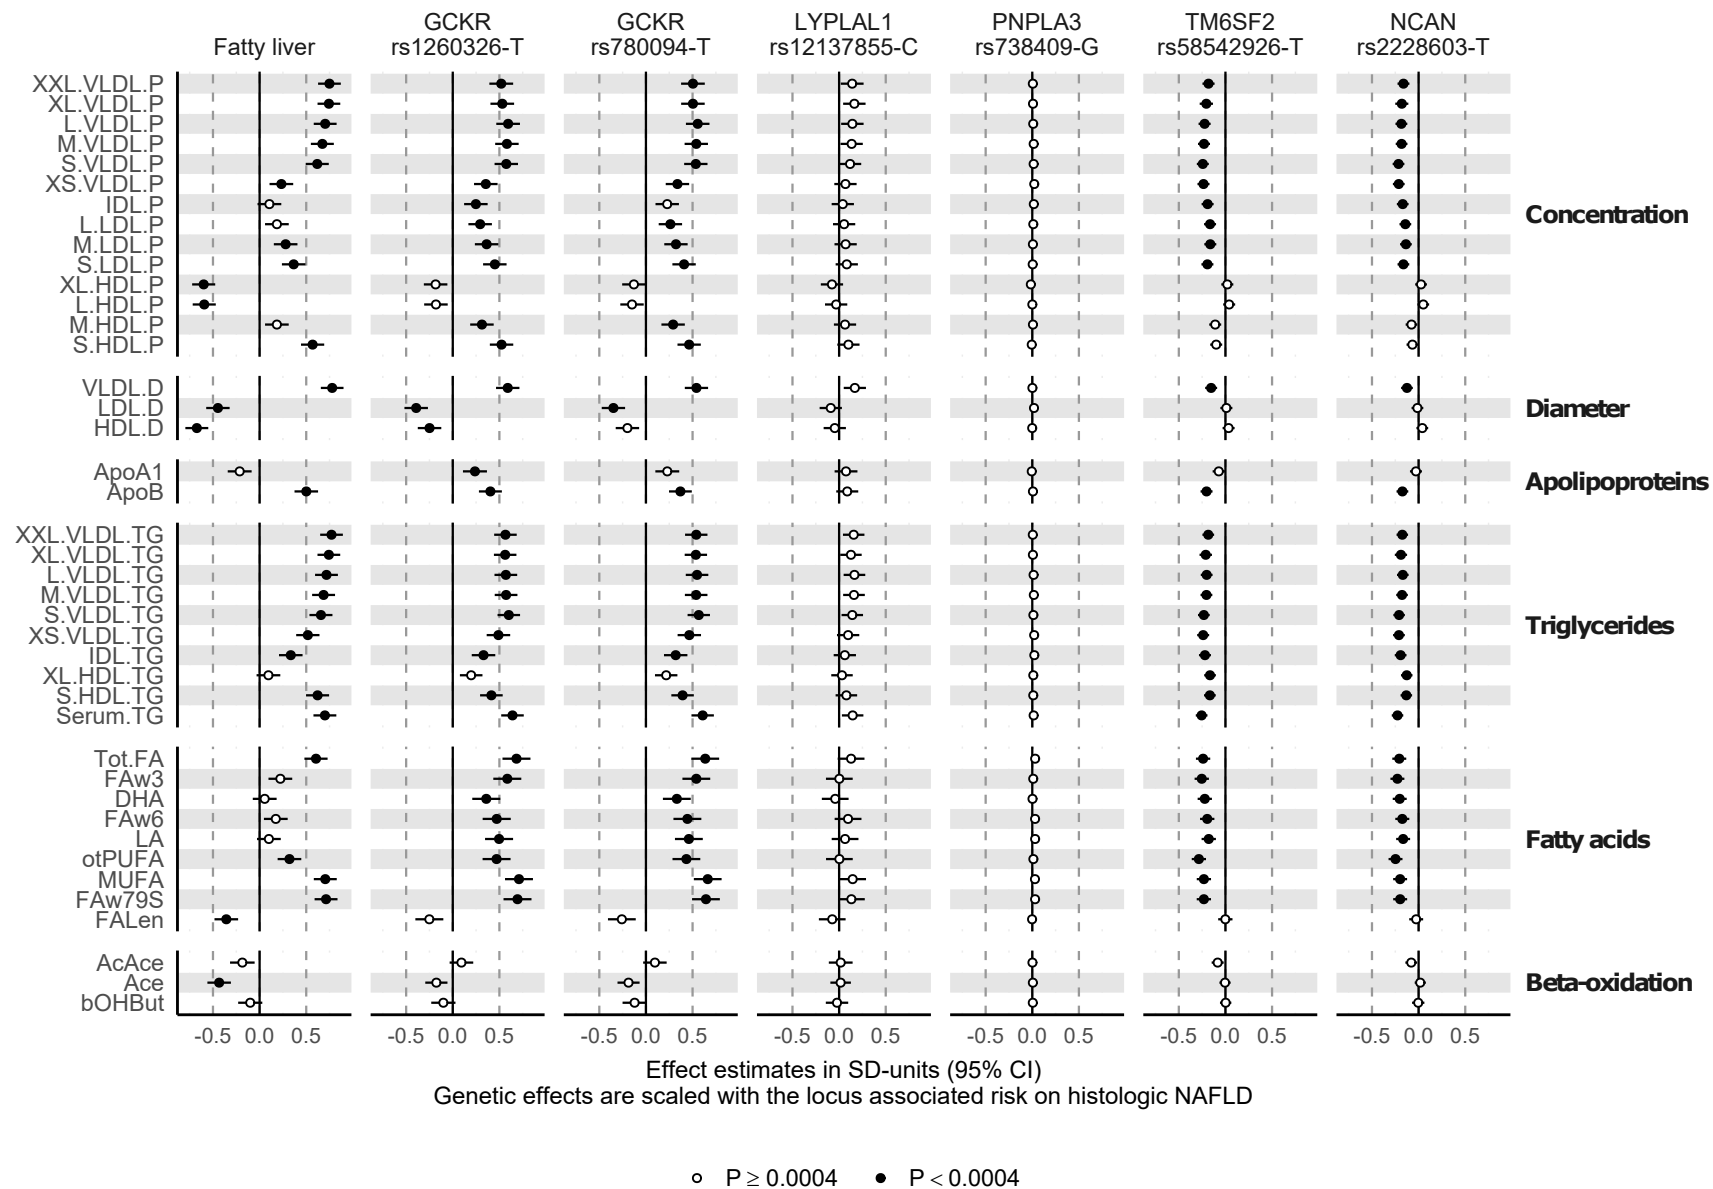

**Fig S3 A) Cross-sectional associations of fatty liver with lipoprotein subfraction particle concentrations, lipoprotein particle diameter, apolipoproteins, triglycerides, fatty acids, and beta-oxidation related measures, and the corresponding associations of the studied NAFLD risk alleles.**

The metabolic traits were adjusted for age, sex, and ten first genetic principal components prior to analysis. Effect estimates of *GCKR* rs1260326-T, *GCKR* rs780094-T, *LYPLAL1* rs12137855-C, *PNPLA3* rs738409-G, and *NCAN* rs2228603-T on metabolic traits were acquired from a publicly available metabolomics GWAS (19). Biomarker abbreviations as in Table S1.

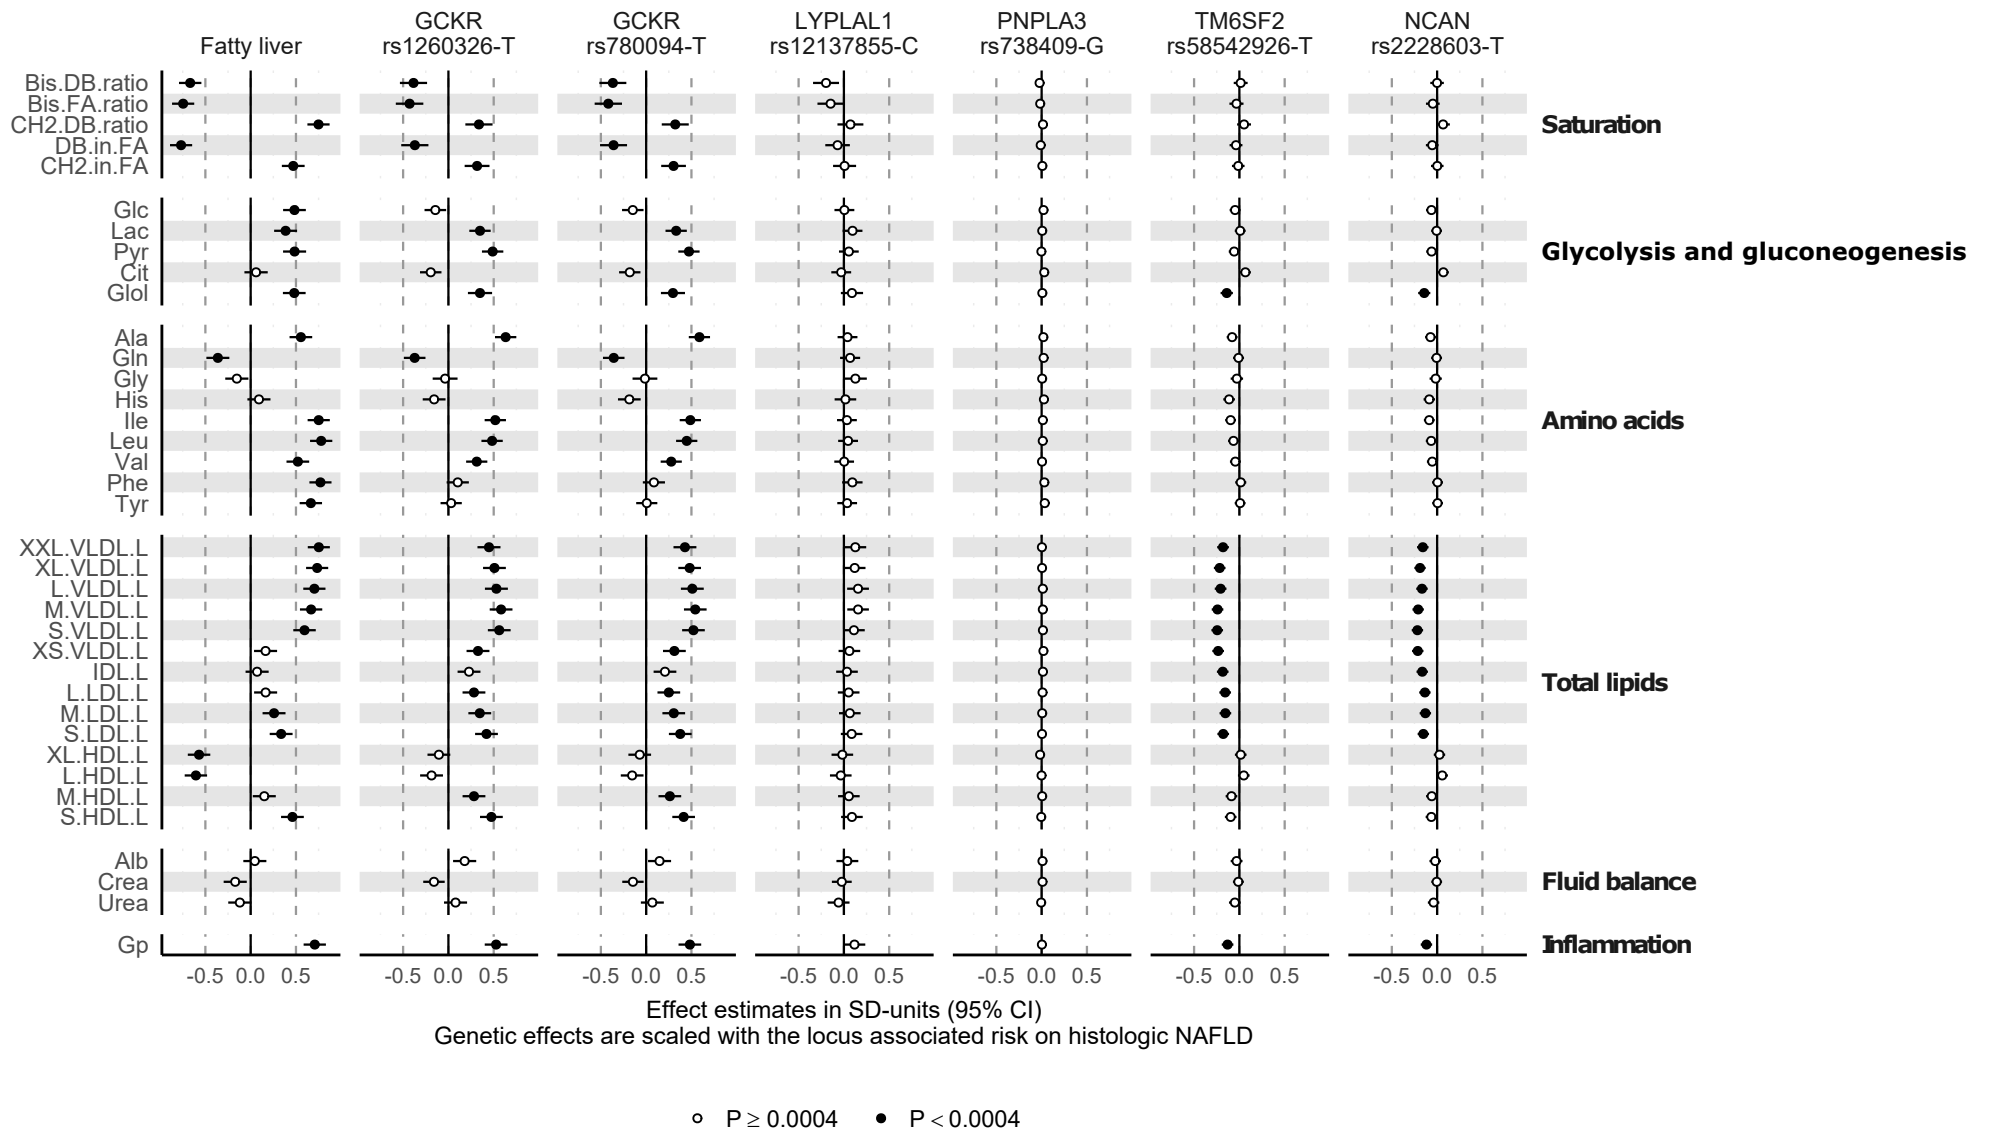

**Fig S3 B) Cross-sectional associations of fatty liver with fatty acid saturation, glycolysis and gluconeogenesis related metabolites, amino acids, total lipids in lipoprotein subfractions, fluid balance and inflammation related measures, and the corresponding associations of the studied NAFLD risk alleles.**

The metabolic traits were adjusted for age, sex, and ten first genetic principal components prior to analysis. Effect estimates of *GCKR* rs1260326-T, *GCKR* rs780094-T, *LYPLAL1* rs12137855-C, *PNPLA3* rs738409-G, and *NCAN* rs2228603-T on metabolic traits were acquired from a publicly available metabolomics GWAS (19). Biomarker abbreviations as in Table S1.

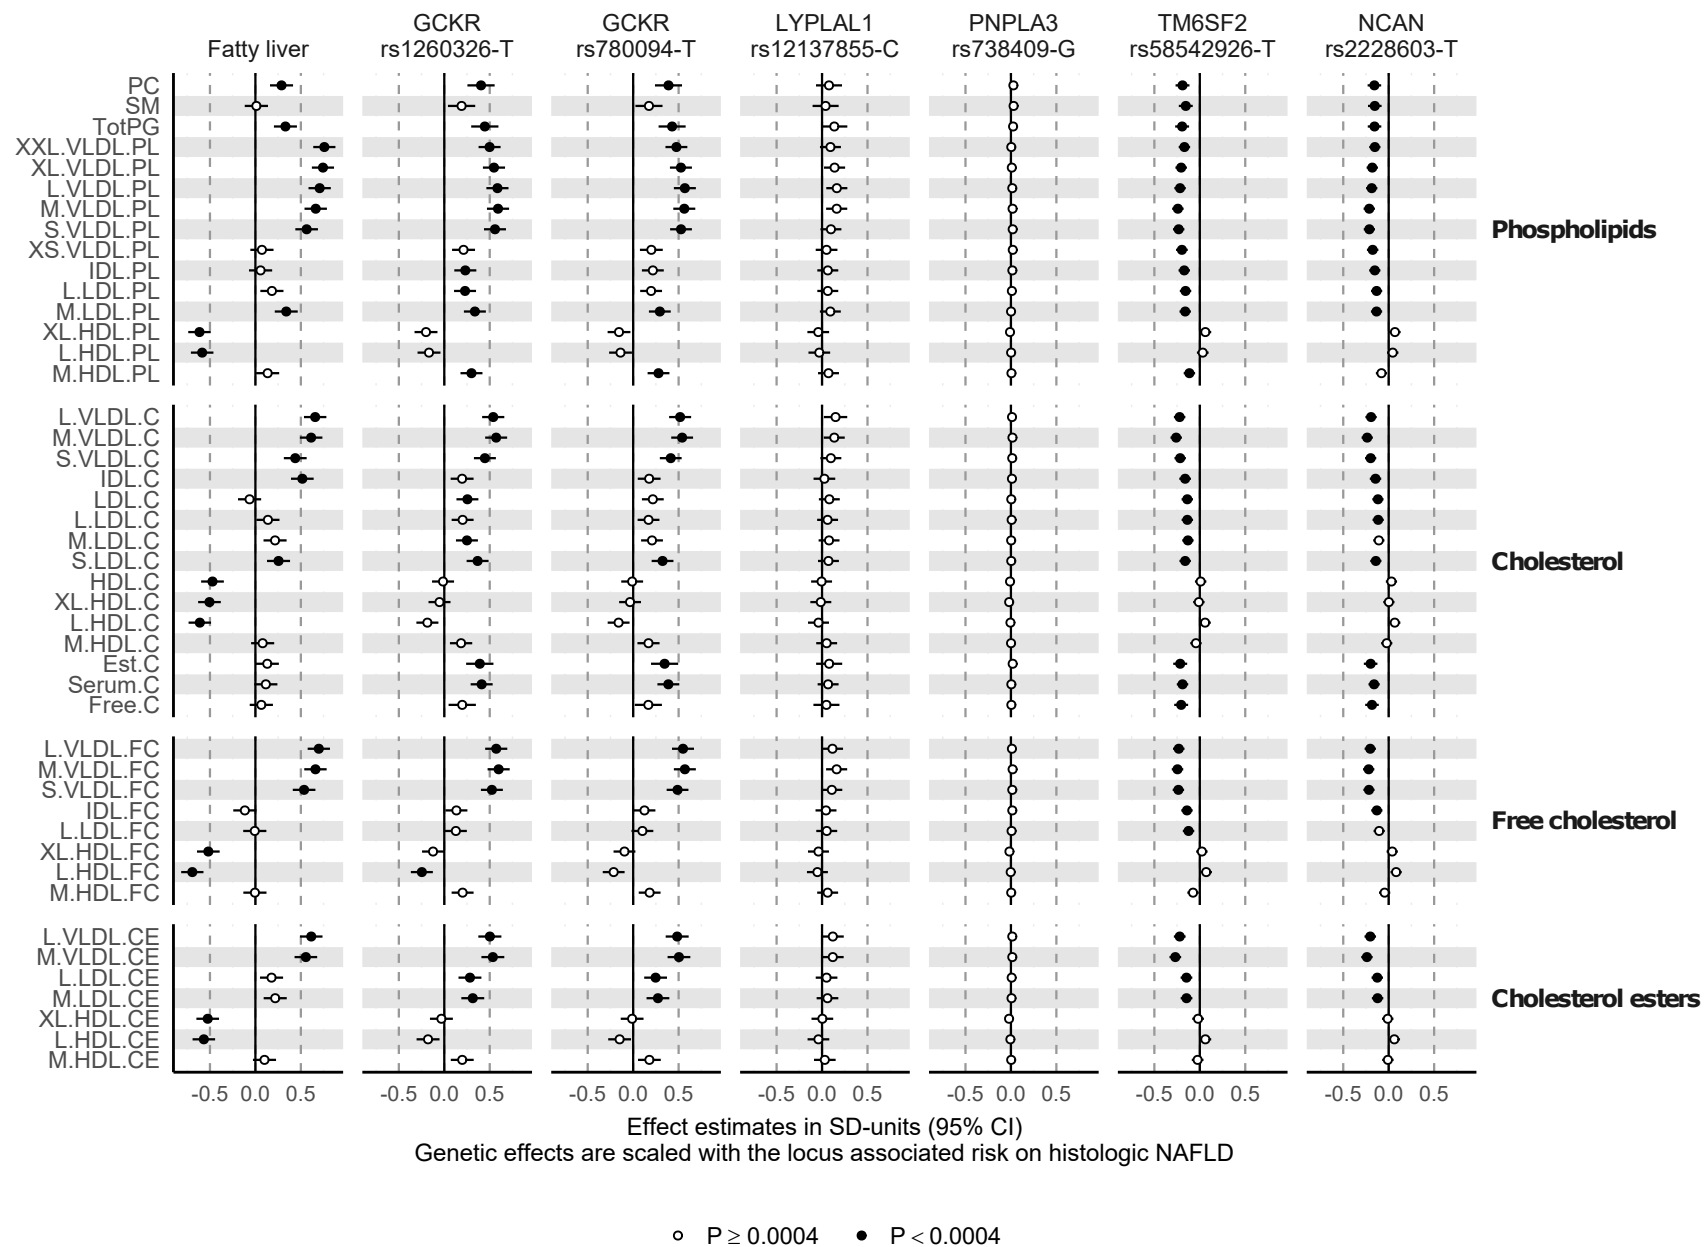

**Fig S3 C) Cross-sectional associations of fatty liver with phospholipids, cholesterol, free cholesterol, and cholesterol esters related measures, and the corresponding associations of the studied NAFLD risk alleles.**

The metabolic traits were adjusted for age, sex, and ten first genetic principal components prior to analysis. Effect estimates of *GCKR* rs1260326-T, *GCKR* rs780094-T, *LYPLAL1* rs12137855-C, *PNPLA3* rs738409-G, and *NCAN* rs2228603-T on metabolic traits were acquired from a publicly available metabolomics GWAS (19). Biomarker abbreviations as in Table S1.

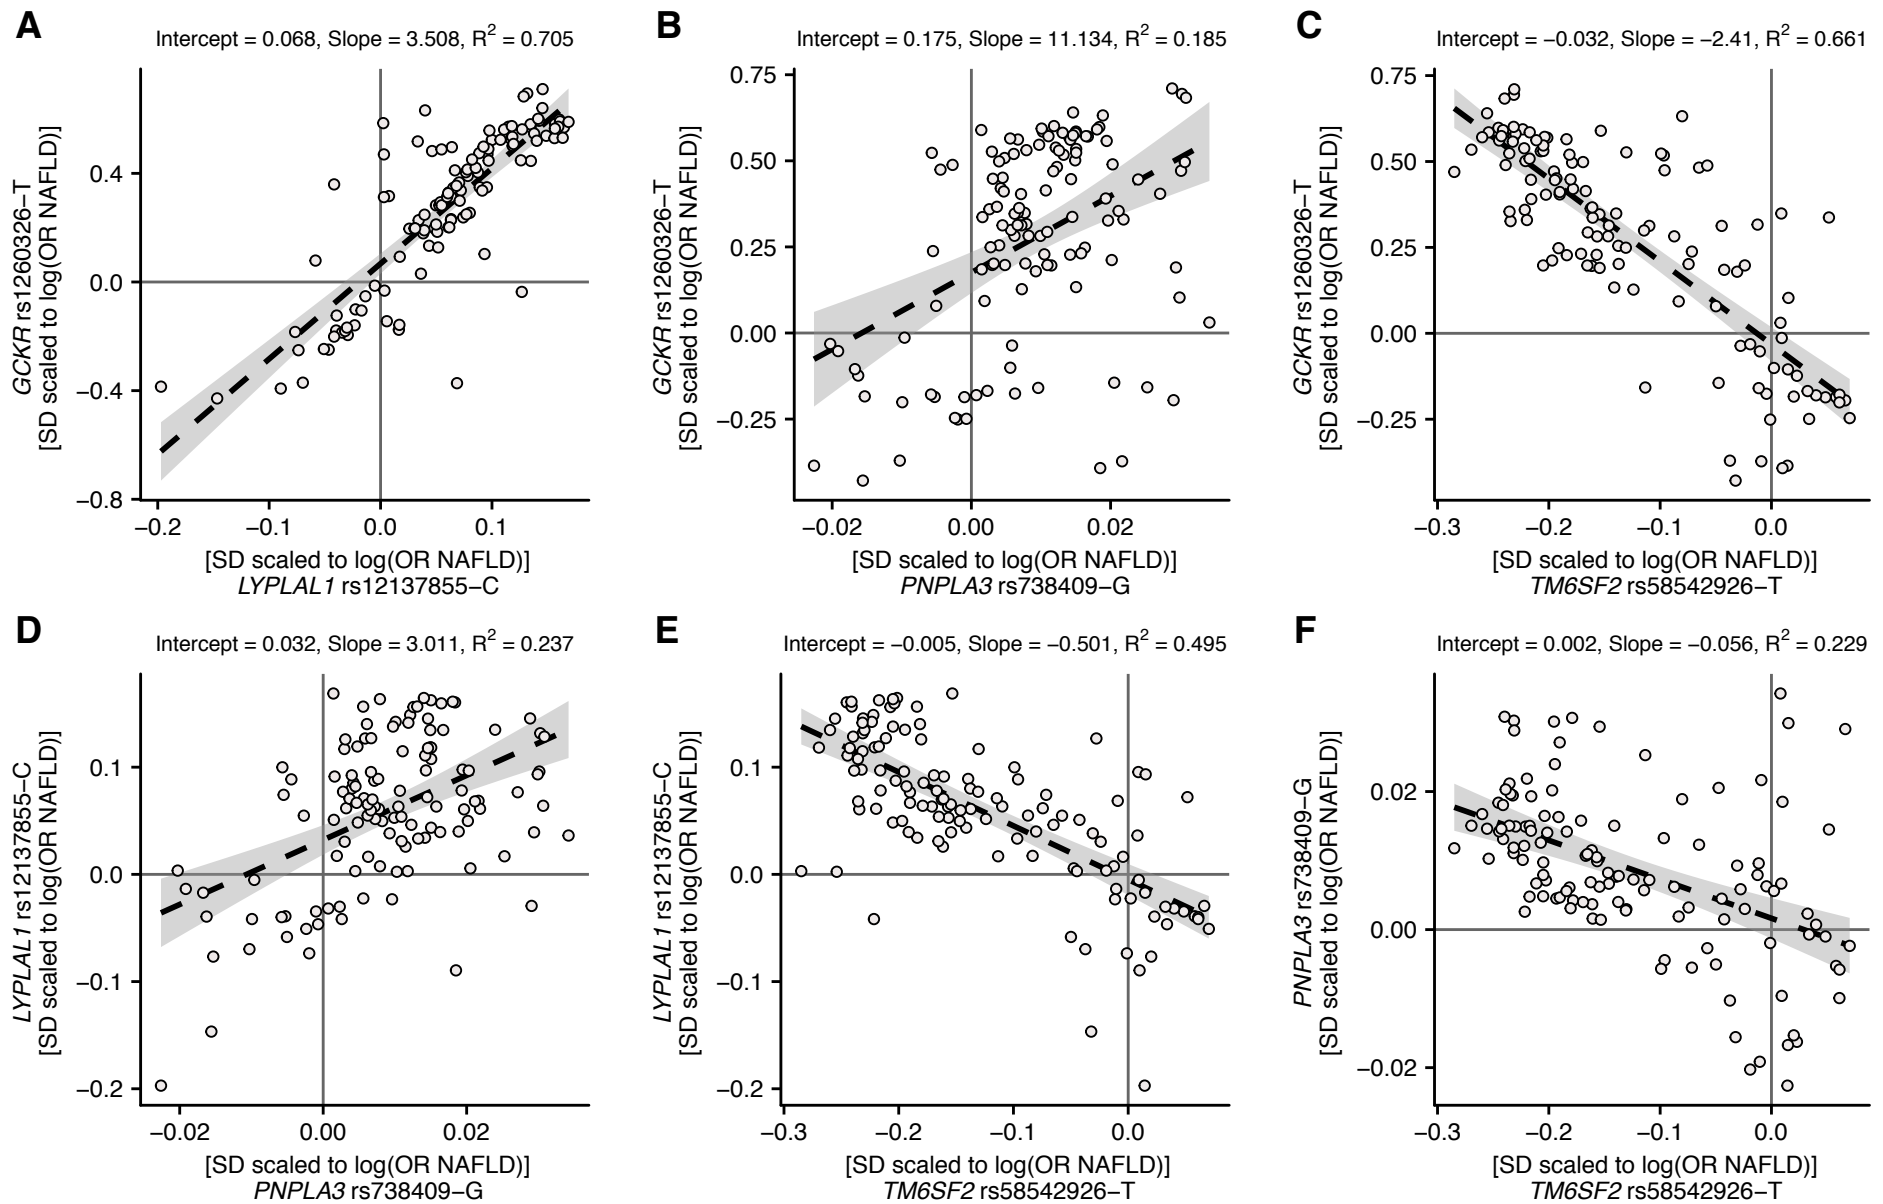

**Fig S4. The overall match between the metabolic effects of the NAFLD risk alleles *GCKR* rs1260326-T, *LYPLAL1* rs12137855-C, *PNPLA3* rs738409-G, and *TM6SF2* rs58542926-T.**

The dashed line shows the linear fit between the studied risk alleles, and the grey area indicates the 95% confidence interval for the line.

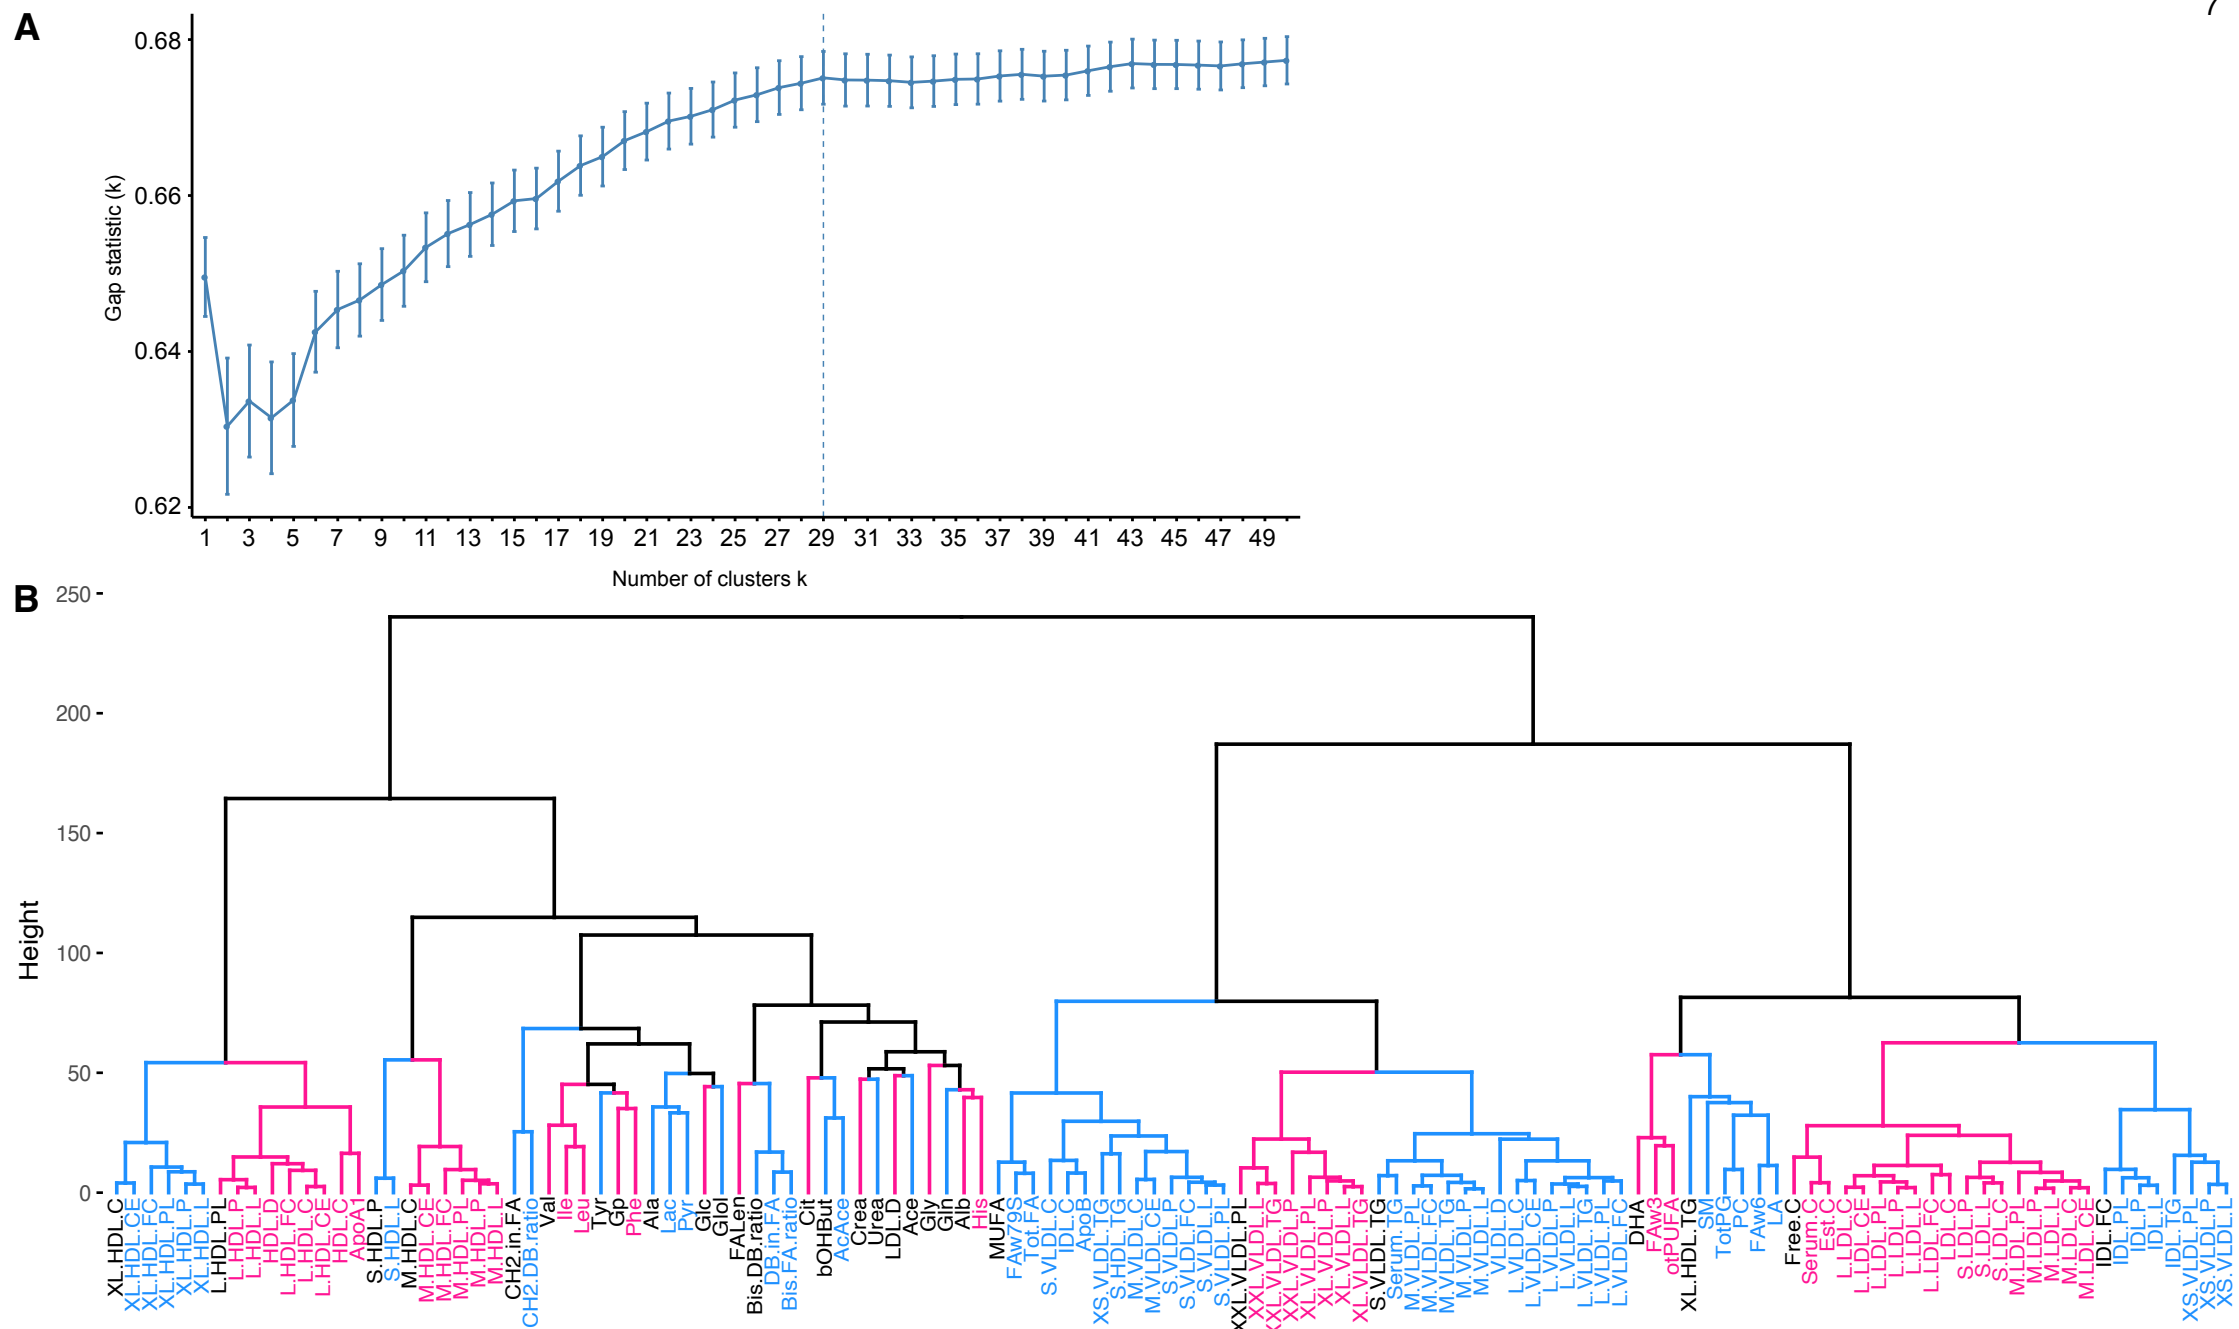

**Fig S5. Cluster analysis of the 123 metabolic traits.**

A) The YFS metabolomics data was analysed with factextra package in R using hcut (hierarchical clustering) and gap\_stat (gap statistics) for partitioning and estimating the optimal number of clusters. B) The cluster dendrogram was illustrated using  $k=29$  as number of clusters; one metabolic measure from each cluster was selected for the sensitivity analyses (indicated with black font). Biomarker abbreviations as in Table S1.



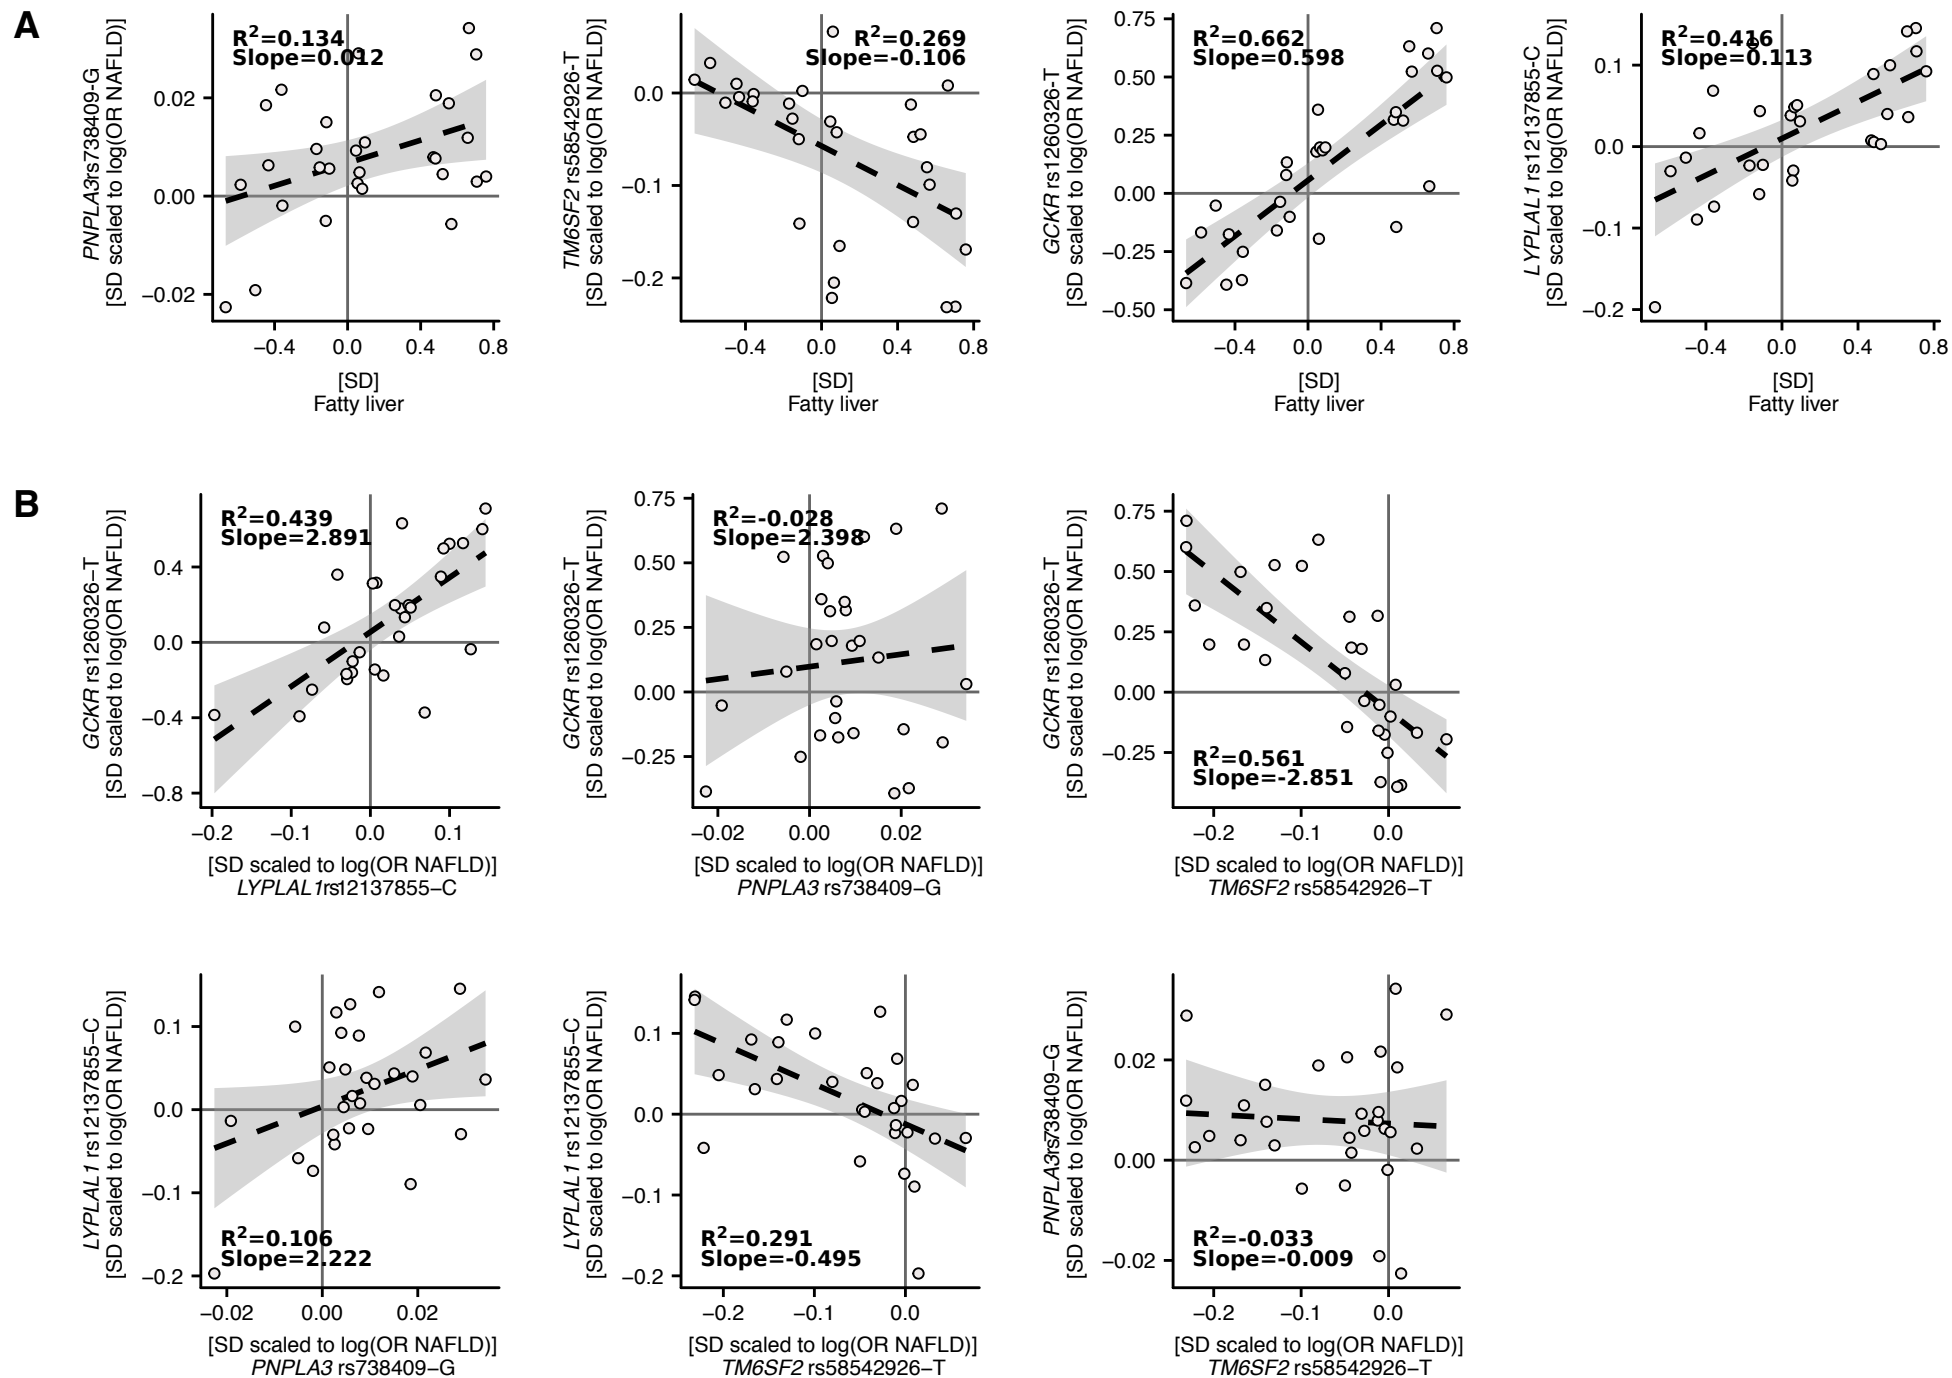

**Fig S6. Correlations of the metabolic effects using the 29 metabolic measures obtained in cluster analysis.**

A) Fatty liver vs. genetic effects. B) Pairwise comparisons of the genetic effects.

**Table S1. NMR based metabolic traits.**

| <b>Abbreviation</b> | <b>Biomarker</b>                                          |
|---------------------|-----------------------------------------------------------|
| AcAce               | Acetoacetate                                              |
| Ace                 | Acetate                                                   |
| Ala                 | Alanine                                                   |
| Alb                 | Albumin                                                   |
| ApoA1               | ApoA1                                                     |
| ApoB                | ApoB                                                      |
| Bis.DB.ratio        | Ratio of bis-allylic bonds to double bonds in lipids      |
| Bis.FA.ratio        | Ratio of bis-allylic bonds to total fatty acids in lipids |
| bOHBut              | 3-hydroxybutyrate                                         |
| CH2.DB.ratio        | CH2 groups to double bonds ratio                          |
| CH2.in.FA           | CH2 groups in fatty acids                                 |
| Cit                 | Citrate                                                   |
| Crea                | Creatinine                                                |
| DB.in.FA            | Double bonds in fatty acids                               |
| DHA                 | 22:6, docosaehaenoic acid (DHA)                           |
| Est.C               | Esterified cholesterol                                    |
| FALen               | Fatty acid length                                         |
| FAw3                | Omega-3 fatty acids                                       |
| FAw6                | Omega-6 fatty acids                                       |
| FAw79S              | Omega-7 and -9 and saturated fatty acids                  |
| Free.C              | Free cholesterol                                          |
| Glc                 | Glucose                                                   |
| Gln                 | Glutamine                                                 |
| Glol                | Glycerol                                                  |
| Gly                 | Glycine                                                   |
| Gp                  | Glycoprotein acetyls, mainly a1-acid glycoprotein         |
| HDL.C               | Total cholesterol in HDL                                  |
| HDL.D               | HDL diameter                                              |
| His                 | Histidine                                                 |
| IDL.C               | Total cholesterol in IDL                                  |
| IDL.FC              | Free cholesterol in IDL                                   |

|           |                                       |
|-----------|---------------------------------------|
| IDL.L     | Total lipids in IDL                   |
| IDL.P     | Concentration of IDL particles        |
| IDL.PL    | Phospholipids in IDL                  |
| IDL.TG    | Triglycerides in IDL                  |
| Ile       | Isoleucine                            |
| L.HDL.C   | Total cholesterol in large HDL        |
| L.HDL.CE  | Cholesterol esters in large HDL       |
| L.HDL.FC  | Free cholesterol in large HDL         |
| L.HDL.L   | Total lipids in large HDL             |
| L.HDL.P   | Concentration of large HDL particles  |
| L.HDL.PL  | Phospholipids in large HDL            |
| L.LDL.C   | Total cholesterol in large LDL        |
| L.LDL.CE  | Cholesterol esters in large LDL       |
| L.LDL.FC  | Free cholesterol in large LDL         |
| L.LDL.L   | Total lipids in large LDL             |
| L.LDL.P   | Concentration of large LDL particles  |
| L.LDL.PL  | Phospholipids in large LDL            |
| L.VLDL.C  | Total cholesterol in large VLDL       |
| L.VLDL.CE | Cholesterol esters in large VLDL      |
| L.VLDL.FC | Free cholesterol in large VLDL        |
| L.VLDL.L  | Total lipids in large VLDL            |
| L.VLDL.P  | Concentration of large VLDL particles |
| L.VLDL.PL | Phospholipids in large VLDL           |
| L.VLDL.TG | Triglycerides in large VLDL           |
| LA        | 18:2, linoleic acid (LA)              |
| Lac       | Lactate                               |
| LDL.C     | Total cholesterol in LDL              |
| LDL.D     | LDL diameter                          |
| Leu       | Leucine                               |
| M.HDL.C   | Total cholesterol in medium HDL       |
| M.HDL.CE  | Cholesterol esters in medium HDL      |
| M.HDL.FC  | Free cholesterol in medium HDL        |
| M.HDL.L   | Total lipids in medium HDL            |

|           |                                             |
|-----------|---------------------------------------------|
| M.HDL.P   | Concentration of medium HDL particles       |
| M.HDL.PL  | Phospholipids in medium HDL                 |
| M.LDL.C   | Total cholesterol in medium LDL             |
| M.LDL.CE  | Cholesterol esters in medium LDL            |
| M.LDL.L   | Total lipids in medium LDL                  |
| M.LDL.P   | Concentration of medium LDL particles       |
| M.LDL.PL  | Phospholipids in medium LDL                 |
| M.VLDL.C  | Total cholesterol in medium VLDL            |
| M.VLDL.CE | Cholesterol esters in medium VLDL           |
| M.VLDL.FC | Free cholesterol in medium VLDL             |
| M.VLDL.L  | Total lipids in medium VLDL                 |
| M.VLDL.P  | Concentration of medium VLDL particles      |
| M.VLDL.PL | Phospholipids in medium VLDL                |
| M.VLDL.TG | Triglycerides in medium VLDL                |
| MUFA      | Mono-unsaturated fatty acids                |
| otPUFA    | Other polyunsaturated fatty acids than 18:2 |
| PC        | Phosphatidylcholine and other cholines      |
| Phe       | Phenylalanine                               |
| Pyr       | Pyruvate                                    |
| S.HDL.L   | Total lipids in small HDL                   |
| S.HDL.P   | Concentration of small HDL particles        |
| S.HDL.TG  | Triglycerides in small HDL                  |
| S.LDL.C   | Total cholesterol in small LDL              |
| S.LDL.L   | Total lipids in small LDL                   |
| S.LDL.P   | Concentration of small LDL particles        |
| S.VLDL.C  | Total cholesterol in small VLDL             |
| S.VLDL.FC | Free cholesterol in small VLDL              |
| S.VLDL.L  | Total lipids in small VLDL                  |
| S.VLDL.P  | Concentration of small VLDL particles       |
| S.VLDL.PL | Phospholipids in small VLDL                 |
| S.VLDL.TG | Triglycerides in small VLDL                 |
| Serum.C   | Serum total cholesterol                     |
| Serum.TG  | Serum total triglycerides                   |

|             |                                                                  |
|-------------|------------------------------------------------------------------|
| SM          | Sphingomyelins                                                   |
| Tot.FA      | Total fatty acids                                                |
| TotPG       | Total phosphoglycerides                                          |
| Tyr         | Tyrosine                                                         |
| Urea        | Urea                                                             |
| Val         | Valine                                                           |
| VLDL.D      | VLDL diameter                                                    |
| XL.HDL.C    | Total cholesterol in very large HDL                              |
| XL.HDL.CE   | Cholesterol esters in very large HDL                             |
| XL.HDL.FC   | Free cholesterol in very large HDL                               |
| XL.HDL.L    | Total lipids in very large HDL                                   |
| XL.HDL.P    | Concentration of very large HDL particles                        |
| XL.HDL.PL   | Phospholipids in very large HDL                                  |
| XL.HDL.TG   | Triglycerides in very large HDL                                  |
| XL.VLDL.L   | Total lipids in very large VLDL                                  |
| XL.VLDL.P   | Concentration of very large VLDL particles                       |
| XL.VLDL.PL  | Phospholipids in very large VLDL                                 |
| XL.VLDL.TG  | Triglycerides in very large VLDL                                 |
| XS.VLDL.L   | Total lipids in very small VLDL                                  |
| XS.VLDL.P   | Concentration of very small VLDL particles                       |
| XS.VLDL.PL  | Phospholipids in very small VLDL                                 |
| XS.VLDL.TG  | Triglycerides in very small VLDL                                 |
| XXL.VLDL.L  | Total lipids in chylomicrons and extremely large VLDL            |
| XXL.VLDL.P  | Concentration of chylomicrons and extremely large VLDL particles |
| XXL.VLDL.PL | Phospholipids in chylomicrons and extremely large VLDL           |
| XXL.VLDL.TG | Triglycerides in chylomicrons and extremely large VLDL           |

---

**Table S2. Fatty liver associations with circulating metabolic traits.**

Biomarker abbreviations as in Supplementary Table 1.

|                 | BIOMARKER     | Study population means (SD) in absolute concentration units |       |          | Fatty liver associations with circulating metabolic traits in SD units |           |           |          |
|-----------------|---------------|-------------------------------------------------------------|-------|----------|------------------------------------------------------------------------|-----------|-----------|----------|
|                 |               | MEAN                                                        | SD    | N        | BETA                                                                   | CI95L     | CI95U     | P-VALUE  |
| Concentration   | XXL.VLDL.P    | 0.09 (pmol/L)                                               | 0.16  | 1810     | 0.749011                                                               | 0.627007  | 0.871014  | 5.84E-32 |
|                 | XL.VLDL.P     | 0.51 (pmol/L)                                               | 0.95  | 1810     | 0.743286                                                               | 0.621407  | 0.865165  | 1.41E-31 |
|                 | L.VLDL.P      | 4.29 (pmol/L)                                               | 5.34  | 1810     | 0.703211                                                               | 0.580620  | 0.825802  | 2.93E-28 |
|                 | M.VLDL.P      | 16.56 (pmol/L)                                              | 13.04 | 1810     | 0.672874                                                               | 0.549803  | 0.795946  | 6.60E-26 |
|                 | S.VLDL.P      | 29.16 (pmol/L)                                              | 13.98 | 1810     | 0.618151                                                               | 0.494420  | 0.741881  | 5.14E-22 |
|                 | XS.VLDL.P     | 36.97 (pmol/L)                                              | 10.74 | 1810     | 0.233459                                                               | 0.106508  | 0.360410  | 0.000323 |
|                 | IDL.P         | 100.45 (pmol/L)                                             | 24.69 | 1810     | 0.105137                                                               | -0.022281 | 0.232556  | 0.106023 |
|                 | L.LDL.P       | 171.72 (pmol/L)                                             | 42.18 | 1810     | 0.185466                                                               | 0.058379  | 0.312552  | 0.004288 |
|                 | M.LDL.P       | 140.94 (pmol/L)                                             | 36.73 | 1810     | 0.279193                                                               | 0.152542  | 0.405844  | 1.65E-05 |
|                 | S.LDL.P       | 157.45 (pmol/L)                                             | 41.24 | 1810     | 0.365433                                                               | 0.239277  | 0.491589  | 1.63E-08 |
|                 | XL.HDL.P      | 0.31 (μmol/L)                                               | 0.20  | 1810     | -0.599662                                                              | -0.723404 | -0.475920 | 7.67E-21 |
|                 | L.HDL.P       | 1.07 (μmol/L)                                               | 0.49  | 1810     | -0.593656                                                              | -0.717442 | -0.469871 | 1.87E-20 |
|                 | M.HDL.P       | 1.96 (μmol/L)                                               | 0.35  | 1810     | 0.185257                                                               | 0.058422  | 0.312092  | 0.004255 |
| S.HDL.P         | 4.66 (μmol/L) | 0.45                                                        | 1810  | 0.568431 | 0.444020                                                               | 0.692841  | 9.38E-19  |          |
| Diameter        | VLDL.D        | 36.40 (nm)                                                  | 1.56  | 1810     | 0.778261                                                               | 0.656622  | 0.899900  | 1.91E-34 |
|                 | LDL.D         | 23.56 (nm)                                                  | 0.18  | 1810     | -0.446957                                                              | -0.572524 | -0.321390 | 4.45E-12 |
|                 | HDL.D         | 9.89 (nm)                                                   | 0.27  | 1810     | -0.673192                                                              | -0.796004 | -0.550380 | 4.99E-26 |
| Apolipoproteins | ApoA1         | 1.69 (g/L)                                                  | 0.23  | 1789     | -0.213676                                                              | -0.341836 | -0.085517 | 0.001107 |
|                 | ApoB          | 0.97 (g/L)                                                  | 0.25  | 1789     | 0.500798                                                               | 0.374528  | 0.627069  | 1.38E-14 |
| Triglycerides   | XXL.VLDL.TG   | 0.01 (mmol/L)                                               | 0.03  | 1810     | 0.771234                                                               | 0.649573  | 0.892895  | 7.14E-34 |
|                 | XL.VLDL.TG    | 0.03 (mmol/L)                                               | 0.06  | 1810     | 0.742703                                                               | 0.620739  | 0.864668  | 1.72E-31 |
|                 | L.VLDL.TG     | 0.16 (mmol/L)                                               | 0.20  | 1810     | 0.717226                                                               | 0.594807  | 0.839645  | 2.31E-29 |
|                 | M.VLDL.TG     | 0.31 (mmol/L)                                               | 0.26  | 1810     | 0.686123                                                               | 0.563239  | 0.809008  | 6.54E-27 |
|                 | S.VLDL.TG     | 0.25 (mmol/L)                                               | 0.14  | 1810     | 0.657862                                                               | 0.534602  | 0.781123  | 8.40E-25 |
|                 | XS.VLDL.TG    | 0.12 (mmol/L)                                               | 0.04  | 1810     | 0.517235                                                               | 0.392384  | 0.642087  | 9.35E-16 |
|                 | IDL.TG        | 0.14 (mmol/L)                                               | 0.04  | 1810     | 0.334305                                                               | 0.207929  | 0.460682  | 2.44E-07 |
|                 | XL.HDL.TG     | 0.01 (mmol/L)                                               | 0.01  | 1810     | 0.094836                                                               | -0.032420 | 0.222092  | 0.144309 |

|                |              |                |      |      |           |           |           |          |
|----------------|--------------|----------------|------|------|-----------|-----------|-----------|----------|
|                | S.HDL.TG     | 0.05 (mmol/L)  | 0.02 | 1810 | 0.621684  | 0.498097  | 0.745271  | 2.74E-22 |
|                | Serum.TG     | 1.36 (mmol/L)  | 0.75 | 1810 | 0.700204  | 0.577507  | 0.822901  | 5.37E-28 |
| Fatty acids    | Tot.FA       | 11.18 (mmol/L) | 2.76 | 1802 | 0.604845  | 0.480584  | 0.729105  | 5.25E-21 |
|                | FAw3         | 0.42 (mmol/L)  | 0.14 | 1803 | 0.222602  | 0.095214  | 0.349989  | 0.000631 |
|                | DHA          | 0.17 (mmol/L)  | 0.07 | 1803 | 0.054659  | -0.073182 | 0.182501  | 0.402154 |
|                | FAw6         | 3.72 (mmol/L)  | 0.70 | 1802 | 0.173684  | 0.046311  | 0.301058  | 0.007604 |
|                | LA           | 3.13 (mmol/L)  | 0.60 | 1802 | 0.099572  | -0.027722 | 0.226866  | 0.125442 |
|                | otPUFA       | 2.14 (mmol/L)  | 0.55 | 1803 | 0.320201  | 0.193357  | 0.447045  | 8.32E-07 |
|                | MUFA         | 3.24 (mmol/L)  | 1.15 | 1800 | 0.704287  | 0.581285  | 0.827288  | 3.67E-28 |
|                | FAw79S       | 7.04 (mmol/L)  | 2.14 | 1802 | 0.712518  | 0.589610  | 0.835427  | 8.41E-29 |
|                | FALen        | 18.04 (mmol/L) | 0.25 | 1801 | -0.356949 | -0.483600 | -0.230299 | 3.88E-08 |
| Saturation     | Bis.DB.ratio | 0.54           | 0.03 | 1801 | -0.667642 | -0.791163 | -0.544122 | 2.26E-25 |
|                | Bis.FA.ratio | 0.67           | 0.08 | 1801 | -0.745475 | -0.867996 | -0.622954 | 1.93E-31 |
|                | CH2.DB.ratio | 7.77           | 0.69 | 1802 | 0.748779  | 0.626248  | 0.871309  | 1.09E-31 |
|                | DB.in.FA     | 1.26           | 0.09 | 1802 | -0.768138 | -0.890383 | -0.645894 | 2.48E-33 |
|                | CH2.in.FA    | 9.69           | 0.26 | 1802 | 0.469914  | 0.344166  | 0.595662  | 3.83E-13 |
| Beta-oxidation | AcAce        | 0.06 (mmol/L)  | 0.04 | 1760 | -0.185173 | -0.317071 | -0.053275 | 0.006000 |
|                | Ace          | 0.05 (mmol/L)  | 0.01 | 1808 | -0.433652 | -0.559715 | -0.307588 | 2.19E-11 |
|                | bOHBut       | 0.10 (mmol/L)  | 0.12 | 1757 | -0.100417 | -0.229835 | 0.029001  | 0.128523 |
| Glycolysis     | Glc          | 4.72 (mmol/L)  | 0.76 | 1808 | 0.483413  | 0.357966  | 0.608860  | 7.20E-14 |
|                | Lac          | 1.45 (mmol/L)  | 0.38 | 1806 | 0.385629  | 0.259048  | 0.512210  | 2.91E-09 |
|                | Pyr          | 0.08 (mmol/L)  | 0.02 | 1791 | 0.484841  | 0.357564  | 0.612118  | 1.37E-13 |
|                | Cit          | 0.10 (mmol/L)  | 0.02 | 1796 | 0.059659  | -0.068867 | 0.188184  | 0.363076 |
|                | Glol         | 0.10 (mmol/L)  | 0.04 | 1807 | 0.481203  | 0.355794  | 0.606612  | 9.14E-14 |
| Amino acids    | Ala          | 0.40 (mmol/L)  | 0.06 | 1808 | 0.554320  | 0.429348  | 0.679292  | 8.70E-18 |
|                | Gln          | 0.60 (mmol/L)  | 0.07 | 1808 | -0.362142 | -0.488913 | -0.235370 | 2.54E-08 |
|                | Gly          | 0.29 (mmol/L)  | 0.06 | 1805 | -0.152831 | -0.280616 | -0.025046 | 0.019195 |
|                | His          | 0.06 (mmol/L)  | 0.01 | 1808 | 0.091398  | -0.035962 | 0.218758  | 0.159755 |
|                | Ile          | 0.05 (mmol/L)  | 0.02 | 1804 | 0.751168  | 0.628736  | 0.873601  | 6.39E-32 |
|                | Leu          | 0.08 (mmol/L)  | 0.02 | 1801 | 0.778430  | 0.655593  | 0.901268  | 7.61E-34 |
|                | Val          | 0.21 (mmol/L)  | 0.04 | 1808 | 0.520755  | 0.395513  | 0.645997  | 7.40E-16 |
|                | Phe          | 0.08 (mmol/L)  | 0.01 | 1808 | 0.770320  | 0.648318  | 0.892323  | 1.26E-33 |
|                | Tyr          | 0.05 (mmol/L)  | 0.01 | 1808 | 0.664306  | 0.540812  | 0.787801  | 3.72E-25 |

|               |               |                |       |          |           |           |           |          |
|---------------|---------------|----------------|-------|----------|-----------|-----------|-----------|----------|
| Total lipids  | XXL.VLDL.L    | 0.02 (mmol/L)  | 0.04  | 1810     | 0.752161  | 0.630252  | 0.874070  | 3.00E-32 |
|               | XL.VLDL.L     | 0.05 (mmol/L)  | 0.09  | 1810     | 0.733823  | 0.611801  | 0.855844  | 8.71E-31 |
|               | L.VLDL.L      | 0.25 (mmol/L)  | 0.33  | 1810     | 0.703280  | 0.580682  | 0.825877  | 2.92E-28 |
|               | M.VLDL.L      | 0.59 (mmol/L)  | 0.45  | 1810     | 0.667171  | 0.544024  | 0.790318  | 1.75E-25 |
|               | S.VLDL.L      | 0.63 (mmol/L)  | 0.29  | 1810     | 0.594537  | 0.470548  | 0.718526  | 1.89E-20 |
|               | XS.VLDL.L     | 0.52 (mmol/L)  | 0.15  | 1810     | 0.164410  | 0.037181  | 0.291639  | 0.011413 |
|               | IDL.L         | 1.24 (mmol/L)  | 0.30  | 1810     | 0.071160  | -0.056298 | 0.198617  | 0.274003 |
|               | L.LDL.L       | 1.55 (mmol/L)  | 0.39  | 1810     | 0.165097  | 0.037966  | 0.292228  | 0.011012 |
|               | M.LDL.L       | 0.92 (mmol/L)  | 0.25  | 1810     | 0.258032  | 0.131310  | 0.384754  | 6.88E-05 |
|               | S.LDL.L       | 0.57 (mmol/L)  | 0.16  | 1810     | 0.336374  | 0.210047  | 0.462701  | 2.04E-07 |
|               | XL.HDL.L      | 0.36 (mmol/L)  | 0.24  | 1810     | -0.569869 | -0.693956 | -0.445782 | 6.30E-19 |
|               | L.HDL.L       | 0.81 (mmol/L)  | 0.40  | 1810     | -0.604677 | -0.728329 | -0.481025 | 3.49E-21 |
|               | M.HDL.L       | 1.05 (mmol/L)  | 0.19  | 1810     | 0.150296  | 0.023359  | 0.277234  | 0.020432 |
|               | S.HDL.L       | 1.27 (mmol/L)  | 0.14  | 1810     | 0.461090  | 0.335528  | 0.586651  | 9.47E-13 |
| Phospholipids | PC            | 2.00 (mmol/L)  | 0.39  | 1803     | 0.287382  | 0.160523  | 0.414242  | 9.62E-06 |
|               | SM            | 0.26 (mmol/L)  | 0.05  | 1803     | 0.010710  | -0.117213 | 0.138634  | 0.869673 |
|               | TotPG         | 0.85 (mmol/L)  | 0.19  | 1803     | 0.330287  | 0.203705  | 0.456870  | 3.54E-07 |
|               | XXL.VLDL.PL   | 0.002 (mmol/L) | 0.004 | 1810     | 0.758473  | 0.636586  | 0.880360  | 9.42E-33 |
|               | XL.VLDL.PL    | 0.01 (mmol/L)  | 0.02  | 1810     | 0.743177  | 0.621291  | 0.865064  | 1.45E-31 |
|               | L.VLDL.PL     | 0.05 (mmol/L)  | 0.06  | 1810     | 0.706902  | 0.584324  | 0.829479  | 1.56E-28 |
|               | M.VLDL.PL     | 0.12 (mmol/L)  | 0.08  | 1810     | 0.663591  | 0.540387  | 0.786796  | 3.25E-25 |
|               | S.VLDL.PL     | 0.14 (mmol/L)  | 0.06  | 1810     | 0.563732  | 0.439391  | 0.688072  | 1.70E-18 |
|               | XS.VLDL.PL    | 0.17 (mmol/L)  | 0.05  | 1810     | 0.071896  | -0.055553 | 0.199345  | 0.269039 |
|               | IDL.PL        | 0.34 (mmol/L)  | 0.08  | 1810     | 0.056877  | -0.070614 | 0.184368  | 0.382033 |
|               | L.LDL.PL      | 0.38 (mmol/L)  | 0.08  | 1810     | 0.181640  | 0.054529  | 0.308751  | 0.005160 |
|               | M.LDL.PL      | 0.23 (mmol/L)  | 0.05  | 1810     | 0.339378  | 0.213075  | 0.465681  | 1.58E-07 |
|               | XL.HDL.PL     | 0.19 (mmol/L)  | 0.13  | 1810     | -0.615090 | -0.738650 | -0.491530 | 7.12E-22 |
|               | L.HDL.PL      | 0.41 (mmol/L)  | 0.17  | 1810     | -0.585698 | -0.709614 | -0.461783 | 6.28E-20 |
| M.HDL.PL      | 0.48 (mmol/L) | 0.08           | 1810  | 0.134743 | 0.007717  | 0.261770  | 0.037774  |          |
| Cholesterol   | L.VLDL.C      | 0.05 (mmol/L)  | 0.07  | 1810     | 0.657546  | 0.534380  | 0.780711  | 8.15E-25 |
|               | M.VLDL.C      | 0.16 (mmol/L)  | 0.11  | 1810     | 0.613290  | 0.489521  | 0.737059  | 1.08E-21 |
|               | S.VLDL.C      | 0.24 (mmol/L)  | 0.09  | 1810     | 0.438444  | 0.313010  | 0.563878  | 1.05E-11 |
|               | IDL.C         | 0.24 (mmol/L)  | 0.11  | 1810     | 0.516311  | 0.391650  | 0.640971  | 9.51E-16 |



|                    |           |               |      |      |           |           |           |          |
|--------------------|-----------|---------------|------|------|-----------|-----------|-----------|----------|
|                    | LDL.C     | 3.09 (mmol/L) | 0.72 | 1810 | -0.064136 | -0.191474 | 0.063202  | 0.323701 |
|                    | L.LDL.C   | 1.05 (mmol/L) | 0.28 | 1810 | 0.137780  | 0.010606  | 0.264955  | 0.033872 |
|                    | M.LDL.C   | 0.62 (mmol/L) | 0.19 | 1810 | 0.216161  | 0.089289  | 0.343034  | 0.000859 |
|                    | S.LDL.C   | 0.37 (mmol/L) | 0.11 | 1810 | 0.254471  | 0.127732  | 0.381211  | 8.67E-05 |
|                    | HDL.C     | 1.59 (mmol/L) | 0.37 | 1810 | -0.472205 | -0.597230 | -0.347181 | 2.17E-13 |
|                    | XL.HDL.C  | 0.15 (mmol/L) | 0.11 | 1810 | -0.505390 | -0.630158 | -0.380623 | 3.85E-15 |
|                    | L.HDL.C   | 0.36 (mmol/L) | 0.21 | 1810 | -0.611545 | -0.735071 | -0.488019 | 1.17E-21 |
|                    | M.HDL.C   | 0.52 (mmol/L) | 0.11 | 1810 | 0.079695  | -0.047351 | 0.206740  | 0.219072 |
|                    | Est.C     | 3.66 (mmol/L) | 0.71 | 1803 | 0.130657  | 0.003264  | 0.258049  | 0.044580 |
|                    | Serum.C   | 5.07 (mmol/L) | 0.97 | 1810 | 0.114793  | -0.012432 | 0.242018  | 0.077177 |
|                    | Free.C    | 1.41 (mmol/L) | 0.28 | 1803 | 0.065175  | -0.062361 | 0.192711  | 0.316680 |
| Free cholesterol   | L.VLDL.FC | 0.03 (mmol/L) | 0.04 | 1810 | 0.697583  | 0.574923  | 0.820244  | 8.02E-28 |
|                    | M.VLDL.FC | 0.07 (mmol/L) | 0.05 | 1810 | 0.660673  | 0.537449  | 0.783896  | 5.23E-25 |
|                    | S.VLDL.FC | 0.09 (mmol/L) | 0.04 | 1810 | 0.535699  | 0.411084  | 0.660314  | 8.00E-17 |
|                    | IDL.FC    | 0.23 (mmol/L) | 0.06 | 1810 | -0.116098 | -0.243473 | 0.011277  | 0.074216 |
|                    | L.LDL.FC  | 0.29 (mmol/L) | 0.07 | 1810 | -0.006743 | -0.134149 | 0.120662  | 0.917391 |
|                    | XL.HDL.FC | 0.04 (mmol/L) | 0.03 | 1810 | -0.517868 | -0.642522 | -0.393213 | 7.81E-16 |
|                    | L.HDL.FC  | 0.08 (mmol/L) | 0.05 | 1810 | -0.694075 | -0.816601 | -0.571548 | 1.27E-27 |
|                    | M.HDL.FC  | 0.10 (mmol/L) | 0.02 | 1810 | -0.005265 | -0.132485 | 0.121954  | 0.935355 |
| Cholesterol esters | L.VLDL.CE | 0.02 (mmol/L) | 0.03 | 1810 | 0.614507  | 0.490828  | 0.738186  | 8.47E-22 |
|                    | M.VLDL.CE | 0.09 (mmol/L) | 0.05 | 1810 | 0.555136  | 0.430778  | 0.679494  | 5.43E-18 |
|                    | L.LDL.CE  | 0.76 (mmol/L) | 0.22 | 1810 | 0.177498  | 0.050459  | 0.304536  | 0.006242 |
|                    | M.LDL.CE  | 0.46 (mmol/L) | 0.15 | 1810 | 0.217818  | 0.090935  | 0.344700  | 0.000785 |
|                    | XL.HDL.CE | 0.11 (mmol/L) | 0.08 | 1810 | -0.524584 | -0.649178 | -0.399989 | 3.26E-16 |
|                    | L.HDL.CE  | 0.28 (mmol/L) | 0.16 | 1810 | -0.567315 | -0.691328 | -0.443302 | 8.53E-19 |
|                    | M.HDL.CE  | 0.42 (mmol/L) | 0.09 | 1810 | 0.100047  | -0.026947 | 0.227041  | 0.122765 |
| Fluid balance      | Alb       | 0.11 (mmol/L) | 0.01 | 1810 | 0.046044  | -0.081141 | 0.173230  | 0.478078 |
|                    | Crea      | 0.06 (mmol/L) | 0.01 | 1804 | -0.170610 | -0.298141 | -0.043079 | 0.008824 |
|                    | Urea      | 0.07 (mmol/L) | 0.02 | 1790 | -0.119644 | -0.247575 | 0.008287  | 0.066988 |
| Inflammation       | Gp        | 1.55 (mmol/L) | 0.23 | 1807 | 0.707459  | 0.584489  | 0.830430  | 2.08E-28 |

**Table S3. NAFLD risk allele associations with circulating metabolic traits.**

Metabolic effect estimates and the corresponding 95% confidence intervals (BETA, CI95L, CI95U) of *PNPLA3* rs738409-G, *GCKR* rs1260326-T, *GCKR* rs780094-T, *TM6SF2* rs58542926-T, *NCAN* rs2228603-T, and *LYPLAL1* rs12137855-C were acquired from a published GWAS (19). The risk allele effects were scaled with respect to the log(odds ratio) on histologic NAFLD associated with the corresponding locus (SCALED BETA, SCALED CI95L, SCALED CI95U) (12). Biomarker abbreviations as in Supplementary Table 1.

|               | BIOMARKER  | GENE         | RISK ALLELE  | BETA     | CI95L    | CI95U    | SCALED BETA | SCALED CI95L | SCALED CI95U | P-VALUE  | N     | RISK ALLELE FREQUENCY |
|---------------|------------|--------------|--------------|----------|----------|----------|-------------|--------------|--------------|----------|-------|-----------------------|
| Concentration | XXL.VLDL.P | GCKR         | rs1260326-T  | 0.08606  | 0.06494  | 0.10718  | 0.51995     | 0.39234      | 0.64756      | 2.64E-15 | 18960 | 0.363                 |
|               |            | GCKR         | rs780094-T   | 0.08343  | 0.06241  | 0.10444  | 0.50403     | 0.37705      | 0.63101      | 1.34E-14 | 18960 | 0.369                 |
|               |            | LYPLAL1      | rs12137855-C | 0.02672  | 0.00340  | 0.05005  | 0.14019     | 0.01781      | 0.26257      | 0.02613  | 18440 | 0.732                 |
|               |            | PNPLA3       | rs738409-G   | 0.00717  | -0.01715 | 0.03148  | 0.00610     | -0.01459     | 0.02678      | 0.56712  | 18955 | 0.231                 |
|               |            | TM6SF2       | rs58542926-T | -0.11648 | -0.15815 | -0.07480 | -0.18147    | -0.24640     | -0.11654     | 5.85E-08 | 18955 | 0.063                 |
|               |            | NCAN         | rs2228603-T  | -0.10422 | -0.14517 | -0.06328 | -0.16238    | -0.22618     | -0.09858     | 7.84E-07 | 18960 | 0.068                 |
|               | XL.VLDL.P  | GCKR         | rs1260326-T  | 0.08788  | 0.06689  | 0.10888  | 0.53096     | 0.40412      | 0.65780      | 4.17E-16 | 18960 | 0.363                 |
|               |            | GCKR         | rs780094-T   | 0.08340  | 0.06251  | 0.10429  | 0.50388     | 0.37766      | 0.63010      | 8.73E-15 | 18960 | 0.369                 |
|               |            | LYPLAL1      | rs12137855-C | 0.03116  | 0.00826  | 0.05407  | 0.16348     | 0.04333      | 0.28363      | 0.00817  | 18955 | 0.733                 |
|               |            | PNPLA3       | rs738409-G   | 0.00930  | -0.01492 | 0.03352  | 0.00791     | -0.01269     | 0.02852      | 0.45519  | 18955 | 0.231                 |
|               |            | TM6SF2       | rs58542926-T | -0.13157 | -0.17728 | -0.08587 | -0.20499    | -0.27620     | -0.13378     | 2.23E-08 | 15294 | 0.064                 |
|               |            | NCAN         | rs2228603-T  | -0.11567 | -0.16070 | -0.07064 | -0.18021    | -0.25037     | -0.11006     | 6.00E-07 | 15299 | 0.069                 |
| L.VLDL.P      | GCKR       | rs1260326-T  | 0.09825      | 0.07724  | 0.11927  | 0.59361  | 0.46664     | 0.72058      | 1.90E-19     | 18960    | 0.363 |                       |
|               | GCKR       | rs780094-T   | 0.09187      | 0.07096  | 0.11279  | 0.55508  | 0.42873     | 0.68143      | 2.37E-17     | 18960    | 0.369 |                       |
|               | LYPLAL1    | rs12137855-C | 0.02712      | 0.00420  | 0.05005  | 0.14229  | 0.02202     | 0.26256      | 0.02240      | 18955    | 0.733 |                       |
|               | PNPLA3     | rs738409-G   | 0.01187      | -0.01238 | 0.03612  | 0.01010  | -0.01053    | 0.03072      | 0.34461      | 18955    | 0.231 |                       |
|               | TM6SF2     | rs58542926-T | -0.14342     | -0.18497 | -0.10187 | -0.22345 | -0.28818    | -0.15871     | 2.78E-11     | 18955    | 0.063 |                       |
|               | NCAN       | rs2228603-T  | -0.11852     | -0.15925 | -0.07779 | -0.18464 | -0.24810    | -0.12119     | 1.99E-08     | 18960    | 0.068 |                       |
| M.VLDL.P      | GCKR       | rs1260326-T  | 0.09611      | 0.07529  | 0.11694  | 0.58069  | 0.45485     | 0.70652      | 4.67E-19     | 19273    | 0.363 |                       |
|               | GCKR       | rs780094-T   | 0.08936      | 0.06863  | 0.11008  | 0.53989  | 0.41467     | 0.66510      | 7.84E-17     | 19273    | 0.370 |                       |
|               | LYPLAL1    | rs12137855-C | 0.02565      | 0.00290  | 0.04841  | 0.13458  | 0.01521     | 0.25396      | 0.02923      | 19268    | 0.732 |                       |
|               | PNPLA3     | rs738409-G   | 0.01756      | -0.00653 | 0.04164  | 0.01493  | -0.00555    | 0.03542      | 0.15852      | 19268    | 0.231 |                       |
|               | TM6SF2     | rs58542926-T | -0.14754     | -0.18881 | -0.10627 | -0.22987 | -0.29417    | -0.16557     | 4.85E-12     | 19268    | 0.063 |                       |
|               | NCAN       | rs2228603-T  | -0.11721     | -0.15759 | -0.07683 | -0.18261 | -0.24552    | -0.11970     | 2.01E-08     | 19273    | 0.068 |                       |
| S.VLDL.P      | GCKR       | rs1260326-T  | 0.09499      | 0.07418  | 0.11581  | 0.57393  | 0.44819     | 0.69967      | 1.17E-18     | 19273    | 0.363 |                       |
|               | GCKR       | rs780094-T   | 0.08855      | 0.06784  | 0.10926  | 0.53502  | 0.40990     | 0.66014      | 1.46E-16     | 19273    | 0.370 |                       |
|               | LYPLAL1    | rs12137855-C | 0.02246      | -0.00028 | 0.04519  | 0.11780  | -0.00147    | 0.23708      | 0.05624      | 19268    | 0.732 |                       |
|               | PNPLA3     | rs738409-G   | 0.01717      | -0.00689 | 0.04123  | 0.01460  | -0.00586    | 0.03507      | 0.16777      | 19268    | 0.231 |                       |
|               | TM6SF2     | rs58542926-T | -0.15575     | -0.19697 | -0.11453 | -0.24265 | -0.30688    | -0.17843     | 2.92E-13     | 19268    | 0.063 |                       |
|               | NCAN       | rs2228603-T  | -0.13827     | -0.17860 | -0.09793 | -0.21542 | -0.27826    | -0.15257     | 3.56E-11     | 19273    | 0.068 |                       |
| XS.VLDL.P     | GCKR       | rs1260326-T  | 0.05864      | 0.03776  | 0.07953  | 0.35430  | 0.22811     | 0.48049      | 6.00E-08     | 19273    | 0.363 |                       |
|               | GCKR       | rs780094-T   | 0.05591      | 0.03513  | 0.07669  | 0.33778  | 0.21223     | 0.46332      | 2.08E-07     | 19273    | 0.370 |                       |

|         |         |              |          |          |          |          |          |          |          |       |       |
|---------|---------|--------------|----------|----------|----------|----------|----------|----------|----------|-------|-------|
| IDL.P   | LYPLAL1 | rs12137855-C | 0.01298  | -0.00979 | 0.03575  | 0.06809  | -0.05137 | 0.18755  | 0.27095  | 19268 | 0.732 |
|         | PNPLA3  | rs738409-G   | 0.02487  | 0.00077  | 0.04898  | 0.02116  | 0.00065  | 0.04166  | 0.04628  | 19268 | 0.231 |
|         | TM6SF2  | rs58542926-T | -0.15104 | -0.19236 | -0.10973 | -0.23532 | -0.29968 | -0.17096 | 1.71E-12 | 19268 | 0.063 |
|         | NCAN    | rs2228603-T  | -0.13666 | -0.17710 | -0.09621 | -0.21291 | -0.27593 | -0.14990 | 7.00E-11 | 19273 | 0.068 |
|         | GCKR    | rs1260326-T  | 0.04101  | 0.02013  | 0.06189  | 0.24777  | 0.12163  | 0.37391  | 0.00015  | 19273 | 0.363 |
|         | GCKR    | rs780094-T   | 0.03777  | 0.01699  | 0.05854  | 0.22818  | 0.10268  | 0.35368  | 0.00045  | 19273 | 0.370 |
|         | LYPLAL1 | rs12137855-C | 0.00752  | -0.01524 | 0.03028  | 0.03946  | -0.07992 | 0.15883  | 0.52323  | 19268 | 0.732 |
|         | PNPLA3  | rs738409-G   | 0.01917  | -0.00492 | 0.04327  | 0.01631  | -0.00419 | 0.03680  | 0.12432  | 19268 | 0.231 |
|         | TM6SF2  | rs58542926-T | -0.12277 | -0.16408 | -0.08146 | -0.19127 | -0.25563 | -0.12691 | 9.68E-09 | 19268 | 0.063 |
|         | NCAN    | rs2228603-T  | -0.10939 | -0.14980 | -0.06898 | -0.17043 | -0.23339 | -0.10747 | 1.74E-07 | 19273 | 0.068 |
| L.LDL.P | GCKR    | rs1260326-T  | 0.04860  | 0.02774  | 0.06945  | 0.29362  | 0.16762  | 0.41962  | 7.01E-06 | 19273 | 0.363 |
|         | GCKR    | rs780094-T   | 0.04341  | 0.02266  | 0.06416  | 0.26226  | 0.13689  | 0.38762  | 5.48E-05 | 19273 | 0.370 |
|         | LYPLAL1 | rs12137855-C | 0.01025  | -0.01249 | 0.03299  | 0.05377  | -0.06553 | 0.17308  | 0.38448  | 19268 | 0.732 |
|         | PNPLA3  | rs738409-G   | 0.01281  | -0.01127 | 0.03689  | 0.01090  | -0.00959 | 0.03138  | 0.30463  | 19268 | 0.231 |
|         | TM6SF2  | rs58542926-T | -0.10591 | -0.14719 | -0.06462 | -0.16500 | -0.22932 | -0.10068 | 7.56E-07 | 19268 | 0.063 |
|         | NCAN    | rs2228603-T  | -0.09123 | -0.13160 | -0.05086 | -0.14214 | -0.20504 | -0.07923 | 1.32E-05 | 19273 | 0.068 |
|         | GCKR    | rs1260326-T  | 0.06007  | 0.03923  | 0.08091  | 0.36291  | 0.23698  | 0.48884  | 2.81E-08 | 19273 | 0.363 |
|         | GCKR    | rs780094-T   | 0.05329  | 0.03255  | 0.07402  | 0.32194  | 0.19664  | 0.44723  | 7.39E-07 | 19273 | 0.370 |
|         | LYPLAL1 | rs12137855-C | 0.01331  | -0.00941 | 0.03604  | 0.06984  | -0.04939 | 0.18907  | 0.25864  | 19268 | 0.732 |
|         | PNPLA3  | rs738409-G   | 0.00807  | -0.01600 | 0.03213  | 0.00686  | -0.01361 | 0.02733  | 0.51806  | 19268 | 0.231 |
| M.LDL.P | TM6SF2  | rs58542926-T | -0.10424 | -0.14550 | -0.06298 | -0.16240 | -0.22668 | -0.09812 | 1.12E-06 | 19268 | 0.063 |
|         | NCAN    | rs2228603-T  | -0.08736 | -0.12772 | -0.04700 | -0.13610 | -0.19898 | -0.07322 | 3.03E-05 | 19273 | 0.068 |
|         | GCKR    | rs1260326-T  | 0.07465  | 0.05382  | 0.09548  | 0.45101  | 0.32513  | 0.57689  | 4.91E-12 | 19273 | 0.363 |
|         | GCKR    | rs780094-T   | 0.06769  | 0.04696  | 0.08842  | 0.40897  | 0.28370  | 0.53423  | 3.07E-10 | 19273 | 0.370 |
|         | LYPLAL1 | rs12137855-C | 0.01565  | -0.00708 | 0.03839  | 0.08212  | -0.03712 | 0.20136  | 0.18388  | 19268 | 0.732 |
|         | PNPLA3  | rs738409-G   | 0.00529  | -0.01877 | 0.02935  | 0.00450  | -0.01597 | 0.02497  | 0.67146  | 19268 | 0.231 |
|         | TM6SF2  | rs58542926-T | -0.12401 | -0.16526 | -0.08276 | -0.19321 | -0.25747 | -0.12894 | 6.76E-09 | 19268 | 0.063 |
|         | NCAN    | rs2228603-T  | -0.10463 | -0.14499 | -0.06427 | -0.16302 | -0.22590 | -0.10013 | 5.78E-07 | 19273 | 0.068 |
|         | GCKR    | rs1260326-T  | -0.03046 | -0.05135 | -0.00956 | -0.18401 | -0.31026 | -0.05777 | 0.00462  | 19273 | 0.363 |
|         | GCKR    | rs780094-T   | -0.02140 | -0.04219 | -0.00060 | -0.12926 | -0.25488 | -0.00365 | 0.04550  | 19273 | 0.370 |
| S.LDL.P | LYPLAL1 | rs12137855-C | -0.01462 | -0.03741 | 0.00817  | -0.07669 | -0.19622 | 0.04284  | 0.21231  | 19268 | 0.732 |
|         | PNPLA3  | rs738409-G   | -0.01801 | -0.04213 | 0.00611  | -0.01532 | -0.03583 | 0.00519  | 0.14656  | 19268 | 0.231 |
|         | TM6SF2  | rs58542926-T | 0.01289  | -0.02850 | 0.05427  | 0.02007  | -0.04440 | 0.08455  | 0.54504  | 19268 | 0.063 |
|         | NCAN    | rs2228603-T  | 0.01680  | -0.02367 | 0.05726  | 0.02617  | -0.03687 | 0.08920  | 0.41974  | 19273 | 0.068 |
|         | GCKR    | rs1260326-T  | -0.02987 | -0.05075 | -0.00899 | -0.18046 | -0.30662 | -0.05430 | 0.00562  | 19273 | 0.363 |
|         | GCKR    | rs780094-T   | -0.02472 | -0.04550 | -0.00394 | -0.14935 | -0.27487 | -0.02382 | 0.02126  | 19273 | 0.370 |
|         | LYPLAL1 | rs12137855-C | -0.00607 | -0.02882 | 0.01668  | -0.03182 | -0.15117 | 0.08752  | 0.60564  | 19268 | 0.732 |
|         | PNPLA3  | rs738409-G   | 0.00084  | -0.02324 | 0.02492  | 0.00071  | -0.01977 | 0.02120  | 0.94613  | 19268 | 0.231 |
|         | TM6SF2  | rs58542926-T | 0.02572  | -0.01559 | 0.06703  | 0.04007  | -0.02428 | 0.10443  | 0.22794  | 19268 | 0.063 |
|         | NCAN    | rs2228603-T  | 0.03216  | -0.00825 | 0.07256  | 0.05010  | -0.01285 | 0.11305  | 0.12329  | 19273 | 0.068 |
| M.HDL.P | GCKR    | rs1260326-T  | 0.05176  | 0.03091  | 0.07261  | 0.31270  | 0.18673  | 0.43868  | 1.42E-06 | 19273 | 0.363 |

|                 |         |         |              |          |          |          |          |          |          |          |       |       |
|-----------------|---------|---------|--------------|----------|----------|----------|----------|----------|----------|----------|-------|-------|
|                 |         | GCKR    | rs780094-T   | 0.04825  | 0.02751  | 0.06900  | 0.29153  | 0.16619  | 0.41688  | 6.22E-06 | 19273 | 0.370 |
|                 |         | LYPLAL1 | rs12137855-C | 0.01208  | -0.01064 | 0.03480  | 0.06339  | -0.05579 | 0.18257  | 0.30110  | 19268 | 0.732 |
|                 |         | PNPLA3  | rs738409-G   | 0.00845  | -0.01559 | 0.03250  | 0.00719  | -0.01327 | 0.02765  | 0.49433  | 19268 | 0.231 |
|                 |         | TM6SF2  | rs58542926-T | -0.07043 | -0.11169 | -0.02917 | -0.10973 | -0.17402 | -0.04545 | 0.00091  | 19268 | 0.063 |
|                 |         | NCAN    | rs2228603-T  | -0.04883 | -0.08921 | -0.00845 | -0.07608 | -0.13898 | -0.01317 | 0.01873  | 19273 | 0.068 |
|                 | S.HDL.P | GCKR    | rs1260326-T  | 0.08658  | 0.06578  | 0.10738  | 0.52310  | 0.39745  | 0.64874  | 5.41E-16 | 19273 | 0.363 |
|                 |         | GCKR    | rs780094-T   | 0.07670  | 0.05600  | 0.09740  | 0.46339  | 0.33834  | 0.58844  | 5.54E-13 | 19273 | 0.370 |
|                 |         | LYPLAL1 | rs12137855-C | 0.01904  | -0.00369 | 0.04176  | 0.09987  | -0.01933 | 0.21907  | 0.10275  | 19268 | 0.732 |
|                 |         | PNPLA3  | rs738409-G   | -0.00668 | -0.03072 | 0.01736  | -0.00568 | -0.02613 | 0.01477  | 0.58832  | 19268 | 0.231 |
|                 |         | TM6SF2  | rs58542926-T | -0.06363 | -0.10488 | -0.02238 | -0.09913 | -0.16339 | -0.03486 | 0.00267  | 19268 | 0.063 |
|                 |         | NCAN    | rs2228603-T  | -0.04270 | -0.08304 | -0.00235 | -0.06652 | -0.12938 | -0.00366 | 0.03932  | 19273 | 0.068 |
| Diameter        | VLDL.D  | GCKR    | rs1260326-T  | 0.09756  | 0.07679  | 0.11833  | 0.58942  | 0.46394  | 0.71489  | 7.90E-20 | 19273 | 0.363 |
|                 |         | GCKR    | rs780094-T   | 0.08965  | 0.06899  | 0.11032  | 0.54167  | 0.41680  | 0.66654  | 3.88E-17 | 19273 | 0.370 |
|                 |         | LYPLAL1 | rs12137855-C | 0.03216  | 0.00947  | 0.05486  | 0.16873  | 0.04968  | 0.28779  | 0.00594  | 19268 | 0.732 |
|                 |         | PNPLA3  | rs738409-G   | 0.00168  | -0.02234 | 0.02570  | 0.00143  | -0.01901 | 0.02186  | 0.89218  | 19268 | 0.231 |
|                 |         | TM6SF2  | rs58542926-T | -0.09839 | -0.13958 | -0.05721 | -0.15330 | -0.21746 | -0.08913 | 3.55E-06 | 19268 | 0.063 |
|                 |         | NCAN    | rs2228603-T  | -0.08014 | -0.12045 | -0.03984 | -0.12486 | -0.18766 | -0.06207 | 0.00011  | 19273 | 0.068 |
|                 | LDL.D   | GCKR    | rs1260326-T  | -0.06494 | -0.08579 | -0.04409 | -0.39236 | -0.51834 | -0.26637 | 1.39E-09 | 19273 | 0.363 |
|                 |         | GCKR    | rs780094-T   | -0.05773 | -0.07848 | -0.03698 | -0.34876 | -0.47413 | -0.22339 | 6.27E-08 | 19273 | 0.370 |
|                 |         | LYPLAL1 | rs12137855-C | -0.01707 | -0.03980 | 0.00567  | -0.08953 | -0.20881 | 0.02974  | 0.14397  | 19268 | 0.732 |
|                 |         | PNPLA3  | rs738409-G   | 0.02176  | -0.00231 | 0.04584  | 0.01851  | -0.00197 | 0.03899  | 0.07849  | 19268 | 0.231 |
|                 |         | TM6SF2  | rs58542926-T | 0.00638  | -0.03495 | 0.04770  | 0.00994  | -0.05444 | 0.07432  | 0.76386  | 19268 | 0.063 |
|                 |         | NCAN    | rs2228603-T  | -0.00810 | -0.04852 | 0.03233  | -0.01261 | -0.07559 | 0.05037  | 0.69669  | 19273 | 0.068 |
|                 | HDL.D   | GCKR    | rs1260326-T  | -0.04124 | -0.06212 | -0.02037 | -0.24918 | -0.37532 | -0.12304 | 0.00012  | 19273 | 0.363 |
|                 |         | GCKR    | rs780094-T   | -0.03287 | -0.05364 | -0.01209 | -0.19858 | -0.32410 | -0.07306 | 0.00211  | 19273 | 0.370 |
|                 |         | LYPLAL1 | rs12137855-C | -0.00887 | -0.03162 | 0.01388  | -0.04653 | -0.16586 | 0.07281  | 0.44851  | 19268 | 0.732 |
|                 |         | PNPLA3  | rs738409-G   | -0.00084 | -0.02491 | 0.02324  | -0.00071 | -0.02119 | 0.01977  | 0.94605  | 19268 | 0.231 |
|                 |         | TM6SF2  | rs58542926-T | 0.02170  | -0.01960 | 0.06301  | 0.03381  | -0.03054 | 0.09816  | 0.30699  | 19268 | 0.063 |
|                 |         | NCAN    | rs2228603-T  | 0.02547  | -0.01497 | 0.06590  | 0.03967  | -0.02332 | 0.10266  | 0.22078  | 19273 | 0.068 |
| Apolipoproteins | ApoA1   | GCKR    | rs1260326-T  | 0.03938  | 0.01808  | 0.06068  | 0.23790  | 0.10922  | 0.36659  | 0.00033  | 18404 | 0.364 |
|                 |         | GCKR    | rs780094-T   | 0.03791  | 0.01672  | 0.05910  | 0.22905  | 0.10102  | 0.35708  | 0.00051  | 18404 | 0.370 |
|                 |         | LYPLAL1 | rs12137855-C | 0.01414  | -0.00920 | 0.03748  | 0.07419  | -0.04825 | 0.19664  | 0.23879  | 18402 | 0.734 |
|                 |         | PNPLA3  | rs738409-G   | -0.00648 | -0.03109 | 0.01813  | -0.00551 | -0.02645 | 0.01542  | 0.60864  | 18402 | 0.231 |
|                 |         | TM6SF2  | rs58542926-T | -0.04588 | -0.08814 | -0.00363 | -0.07148 | -0.13731 | -0.00565 | 0.03481  | 18399 | 0.063 |
|                 |         | NCAN    | rs2228603-T  | -0.01830 | -0.05956 | 0.02295  | -0.02851 | -0.09279 | 0.03576  | 0.38848  | 18403 | 0.068 |
|                 | ApoB    | GCKR    | rs1260326-T  | 0.06679  | 0.04642  | 0.08716  | 0.40350  | 0.28043  | 0.52657  | 2.51E-10 | 20690 | 0.361 |
|                 |         | GCKR    | rs780094-T   | 0.06118  | 0.04094  | 0.08142  | 0.36964  | 0.24733  | 0.49194  | 5.48E-09 | 20690 | 0.367 |
|                 |         | LYPLAL1 | rs12137855-C | 0.01665  | -0.00583 | 0.03913  | 0.08736  | -0.03056 | 0.20529  | 0.15251  | 20688 | 0.744 |
|                 |         | PNPLA3  | rs738409-G   | 0.00839  | -0.01524 | 0.03201  | 0.00713  | -0.01296 | 0.02722  | 0.49299  | 20688 | 0.231 |
|                 |         | TM6SF2  | rs58542926-T | -0.13005 | -0.17121 | -0.08889 | -0.20262 | -0.26675 | -0.13848 | 1.08E-09 | 20685 | 0.063 |
|                 |         | NCAN    | rs2228603-T  | -0.11150 | -0.15193 | -0.07108 | -0.17372 | -0.23670 | -0.11073 | 1.02E-07 | 20689 | 0.067 |

|               |             |              |              |          |          |          |          |          |          |          |       |       |
|---------------|-------------|--------------|--------------|----------|----------|----------|----------|----------|----------|----------|-------|-------|
| Triglycerides | XXL.VLDL.TG | GCKR         | rs1260326-T  | 0.09349  | 0.07349  | 0.11349  | 0.56483  | 0.44399  | 0.68568  | 8.01E-20 | 21540 | 0.361 |
|               |             | GCKR         | rs780094-T   | 0.08932  | 0.06944  | 0.10920  | 0.53966  | 0.41956  | 0.65976  | 1.94E-18 | 21540 | 0.367 |
|               |             | LYPLAL1      | rs12137855-C | 0.02983  | 0.00789  | 0.05177  | 0.15647  | 0.04138  | 0.27156  | 0.00800  | 21535 | 0.742 |
|               |             | PNPLA3       | rs738409-G   | 0.00656  | -0.01660 | 0.02971  | 0.00558  | -0.01412 | 0.02527  | 0.58063  | 21535 | 0.230 |
|               |             | TM6SF2       | rs58542926-T | -0.11818 | -0.15846 | -0.07789 | -0.18412 | -0.24688 | -0.12135 | 1.07E-08 | 21535 | 0.063 |
|               |             | NCAN         | rs2228603-T  | -0.11220 | -0.15184 | -0.07256 | -0.17480 | -0.23657 | -0.11304 | 3.42E-08 | 21540 | 0.067 |
|               | XL.VLDL.TG  | GCKR         | rs1260326-T  | 0.09300  | 0.07302  | 0.11298  | 0.56189  | 0.44117  | 0.68261  | 1.43E-19 | 21548 | 0.361 |
|               |             | GCKR         | rs780094-T   | 0.08864  | 0.06878  | 0.10849  | 0.53554  | 0.41558  | 0.65549  | 3.97E-18 | 21548 | 0.367 |
|               |             | LYPLAL1      | rs12137855-C | 0.02422  | 0.00230  | 0.04614  | 0.12706  | 0.01207  | 0.24206  | 0.03159  | 21543 | 0.742 |
|               |             | PNPLA3       | rs738409-G   | 0.00787  | -0.01526 | 0.03100  | 0.00669  | -0.01298 | 0.02637  | 0.50812  | 21543 | 0.230 |
|               |             | TM6SF2       | rs58542926-T | -0.13557 | -0.17835 | -0.09278 | -0.21121 | -0.27787 | -0.14455 | 7.28E-10 | 19153 | 0.064 |
|               |             | NCAN         | rs2228603-T  | -0.12161 | -0.16389 | -0.07933 | -0.18947 | -0.25533 | -0.12360 | 2.24E-08 | 19158 | 0.067 |
|               | L.VLDL.TG   | GCKR         | rs1260326-T  | 0.09421  | 0.07406  | 0.11435  | 0.56918  | 0.44747  | 0.69089  | 9.83E-20 | 21239 | 0.361 |
|               |             | GCKR         | rs780094-T   | 0.09071  | 0.07069  | 0.11073  | 0.54806  | 0.42710  | 0.66903  | 1.28E-18 | 21239 | 0.366 |
|               |             | LYPLAL1      | rs12137855-C | 0.03136  | 0.00925  | 0.05348  | 0.16453  | 0.04853  | 0.28054  | 0.00581  | 21234 | 0.742 |
|               |             | PNPLA3       | rs738409-G   | 0.01650  | -0.00680 | 0.03980  | 0.01404  | -0.00578 | 0.03386  | 0.16833  | 21234 | 0.230 |
|               |             | TM6SF2       | rs58542926-T | -0.12928 | -0.16981 | -0.08875 | -0.20141 | -0.26456 | -0.13826 | 5.66E-10 | 21234 | 0.063 |
|               |             | NCAN         | rs2228603-T  | -0.10886 | -0.14881 | -0.06892 | -0.16960 | -0.23184 | -0.10737 | 1.18E-07 | 21239 | 0.067 |
|               | M.VLDL.TG   | GCKR         | rs1260326-T  | 0.09462  | 0.07447  | 0.11477  | 0.57167  | 0.44991  | 0.69342  | 6.80E-20 | 21241 | 0.361 |
|               |             | GCKR         | rs780094-T   | 0.08915  | 0.06912  | 0.10918  | 0.53862  | 0.41761  | 0.65964  | 4.90E-18 | 21241 | 0.366 |
|               |             | LYPLAL1      | rs12137855-C | 0.03041  | 0.00828  | 0.05254  | 0.15953  | 0.04344  | 0.27563  | 0.00751  | 21236 | 0.742 |
|               |             | PNPLA3       | rs738409-G   | 0.01936  | -0.00396 | 0.04268  | 0.01647  | -0.00337 | 0.03630  | 0.10614  | 21236 | 0.230 |
|               |             | TM6SF2       | rs58542926-T | -0.13081 | -0.17136 | -0.09026 | -0.20380 | -0.26697 | -0.14062 | 3.54E-10 | 21236 | 0.063 |
|               |             | NCAN         | rs2228603-T  | -0.11410 | -0.15407 | -0.07413 | -0.17776 | -0.24003 | -0.11549 | 2.84E-08 | 21241 | 0.067 |
|               | S.VLDL.TG   | GCKR         | rs1260326-T  | 0.09945  | 0.07946  | 0.11945  | 0.60088  | 0.48009  | 0.72167  | 6.23E-22 | 21558 | 0.361 |
|               |             | GCKR         | rs780094-T   | 0.09378  | 0.07391  | 0.11365  | 0.56658  | 0.44654  | 0.68662  | 6.74E-20 | 21558 | 0.367 |
|               |             | LYPLAL1      | rs12137855-C | 0.02696  | 0.00500  | 0.04892  | 0.14143  | 0.02621  | 0.25665  | 0.01749  | 21553 | 0.742 |
|               |             | PNPLA3       | rs738409-G   | 0.01396  | -0.00920 | 0.03712  | 0.01187  | -0.00783 | 0.03158  | 0.24325  | 21553 | 0.230 |
|               |             | TM6SF2       | rs58542926-T | -0.14865 | -0.18892 | -0.10837 | -0.23159 | -0.29433 | -0.16884 | 9.26E-13 | 21553 | 0.063 |
|               |             | NCAN         | rs2228603-T  | -0.13430 | -0.17392 | -0.09468 | -0.20923 | -0.27096 | -0.14750 | 5.46E-11 | 21558 | 0.067 |
|               | XS.VLDL.TG  | GCKR         | rs1260326-T  | 0.08106  | 0.06018  | 0.10193  | 0.48972  | 0.36358  | 0.61586  | 6.60E-14 | 19273 | 0.363 |
|               |             | GCKR         | rs780094-T   | 0.07698  | 0.05621  | 0.09776  | 0.46511  | 0.33960  | 0.59063  | 8.39E-13 | 19273 | 0.370 |
| LYPLAL1       |             | rs12137855-C | 0.01845      | -0.00433 | 0.04122  | 0.09676  | -0.02271 | 0.21623  | 0.11760  | 19268    | 0.732 |       |
| PNPLA3        |             | rs738409-G   | 0.02386      | -0.00025 | 0.04797  | 0.02030  | -0.00021 | 0.04080  | 0.05583  | 19268    | 0.231 |       |
| TM6SF2        |             | rs58542926-T | -0.15327     | -0.19457 | -0.11196 | -0.23879 | -0.30314 | -0.17444 | 7.85E-13 | 19268    | 0.063 |       |
| NCAN          |             | rs2228603-T  | -0.13539     | -0.17584 | -0.09495 | -0.21094 | -0.27396 | -0.14793 | 1.03E-10 | 19273    | 0.068 |       |
| IDL.TG        | GCKR        | rs1260326-T  | 0.05457      | 0.03368  | 0.07546  | 0.32969  | 0.20346  | 0.45593  | 4.57E-07 | 19273    | 0.363 |       |
|               | GCKR        | rs780094-T   | 0.05282      | 0.03204  | 0.07361  | 0.31913  | 0.19354  | 0.44471  | 9.23E-07 | 19273    | 0.370 |       |
|               | LYPLAL1     | rs12137855-C | 0.01167      | -0.01110 | 0.03443  | 0.06119  | -0.05821 | 0.18060  | 0.32199  | 19268    | 0.732 |       |
|               | PNPLA3      | rs738409-G   | 0.02570      | 0.00161  | 0.04979  | 0.02186  | 0.00137  | 0.04235  | 0.03923  | 19268    | 0.231 |       |
|               | TM6SF2      | rs58542926-T | -0.14101     | -0.18230 | -0.09972 | -0.21969 | -0.28402 | -0.15536 | 4.28E-11 | 19268    | 0.063 |       |

|             |           |         |              |          |          |          |          |          |          |          |       |       |
|-------------|-----------|---------|--------------|----------|----------|----------|----------|----------|----------|----------|-------|-------|
|             |           | NCAN    | rs2228603-T  | -0.12376 | -0.16422 | -0.08330 | -0.19281 | -0.25585 | -0.12978 | 3.49E-09 | 19273 | 0.068 |
|             | XL.HDL.TG | GCKR    | rs1260326-T  | 0.03267  | 0.01264  | 0.05270  | 0.19737  | 0.07637  | 0.31837  | 0.00157  | 21536 | 0.361 |
|             |           | GCKR    | rs780094-T   | 0.03595  | 0.01605  | 0.05585  | 0.21721  | 0.09700  | 0.33743  | 0.00046  | 21536 | 0.367 |
|             |           | LYPLAL1 | rs12137855-C | 0.00591  | -0.01604 | 0.02785  | 0.03098  | -0.08415 | 0.14611  | 0.60187  | 21531 | 0.742 |
|             |           | PNPLA3  | rs738409-G   | 0.01285  | -0.01030 | 0.03601  | 0.01093  | -0.00876 | 0.03063  | 0.28179  | 21531 | 0.230 |
|             |           | TM6SF2  | rs58542926-T | -0.10615 | -0.14645 | -0.06586 | -0.16538 | -0.22816 | -0.10260 | 3.33E-07 | 21531 | 0.063 |
|             |           | NCAN    | rs2228603-T  | -0.08173 | -0.12135 | -0.04211 | -0.12733 | -0.18906 | -0.06560 | 6.42E-05 | 21536 | 0.067 |
|             | S.HDL.TG  | GCKR    | rs1260326-T  | 0.06854  | 0.04847  | 0.08860  | 0.41408  | 0.29287  | 0.53529  | 3.58E-11 | 21558 | 0.361 |
|             |           | GCKR    | rs780094-T   | 0.06504  | 0.04510  | 0.08498  | 0.39296  | 0.27250  | 0.51341  | 2.58E-10 | 21558 | 0.367 |
|             |           | LYPLAL1 | rs12137855-C | 0.01487  | -0.00714 | 0.03688  | 0.07801  | -0.03747 | 0.19349  | 0.19011  | 21553 | 0.742 |
|             |           | PNPLA3  | rs738409-G   | 0.01257  | -0.01065 | 0.03579  | 0.01069  | -0.00906 | 0.03045  | 0.29372  | 21553 | 0.230 |
|             |           | TM6SF2  | rs58542926-T | -0.10709 | -0.14748 | -0.06670 | -0.16685 | -0.22978 | -0.10392 | 2.76E-07 | 21553 | 0.063 |
|             |           | NCAN    | rs2228603-T  | -0.08444 | -0.12417 | -0.04471 | -0.13155 | -0.19345 | -0.06966 | 3.79E-05 | 21558 | 0.067 |
|             | Serum.TG  | GCKR    | rs1260326-T  | 0.10600  | 0.08599  | 0.12600  | 0.64040  | 0.51952  | 0.76129  | 1.00E-24 | 21545 | 0.361 |
|             |           | GCKR    | rs780094-T   | 0.10069  | 0.08080  | 0.12057  | 0.60833  | 0.48820  | 0.72847  | 1.00E-22 | 21545 | 0.367 |
|             |           | LYPLAL1 | rs12137855-C | 0.02769  | 0.00573  | 0.04965  | 0.14526  | 0.03005  | 0.26047  | 0.01452  | 21540 | 0.742 |
|             |           | PNPLA3  | rs738409-G   | 0.01718  | -0.00599 | 0.04034  | 0.01461  | -0.00509 | 0.03432  | 0.15044  | 21540 | 0.230 |
|             |           | TM6SF2  | rs58542926-T | -0.16398 | -0.20425 | -0.12370 | -0.25547 | -0.31822 | -0.19273 | 3.05E-15 | 21540 | 0.063 |
|             |           | NCAN    | rs2228603-T  | -0.14517 | -0.18482 | -0.10552 | -0.22617 | -0.28794 | -0.16439 | 1.30E-12 | 21545 | 0.067 |
| Fatty acids | Tot.FA    | GCKR    | rs1260326-T  | 0.11308  | 0.08824  | 0.13791  | 0.68318  | 0.53315  | 0.83320  | 6.24E-19 | 13505 | 0.363 |
|             |           | GCKR    | rs780094-T   | 0.10527  | 0.08060  | 0.12994  | 0.63604  | 0.48699  | 0.78509  | 8.18E-17 | 13505 | 0.370 |
|             |           | LYPLAL1 | rs12137855-C | 0.02449  | -0.00290 | 0.05188  | 0.12848  | -0.01518 | 0.27214  | 0.08069  | 13504 | 0.733 |
|             |           | PNPLA3  | rs738409-G   | 0.03625  | 0.00747  | 0.06502  | 0.03083  | 0.00636  | 0.05531  | 0.01390  | 13499 | 0.233 |
|             |           | TM6SF2  | rs58542926-T | -0.15387 | -0.20311 | -0.10464 | -0.23973 | -0.31643 | -0.16302 | 1.06E-09 | 13501 | 0.063 |
|             |           | NCAN    | rs2228603-T  | -0.13302 | -0.18104 | -0.08500 | -0.20724 | -0.28206 | -0.13242 | 6.44E-08 | 13505 | 0.067 |
|             | FAw3      | GCKR    | rs1260326-T  | 0.09680  | 0.07196  | 0.12165  | 0.58487  | 0.43475  | 0.73499  | 3.37E-14 | 13544 | 0.363 |
|             |           | GCKR    | rs780094-T   | 0.08944  | 0.06475  | 0.11412  | 0.54036  | 0.39122  | 0.68949  | 1.76E-12 | 13544 | 0.370 |
|             |           | LYPLAL1 | rs12137855-C | 0.00046  | -0.02687 | 0.02779  | 0.00242  | -0.14095 | 0.14578  | 0.97378  | 13543 | 0.733 |
|             |           | PNPLA3  | rs738409-G   | 0.01207  | -0.01666 | 0.04080  | 0.01027  | -0.01417 | 0.03471  | 0.41310  | 13540 | 0.234 |
|             |           | TM6SF2  | rs58542926-T | -0.16305 | -0.21224 | -0.11385 | -0.25402 | -0.33067 | -0.17738 | 1.11E-10 | 13540 | 0.063 |
|             |           | NCAN    | rs2228603-T  | -0.14595 | -0.19396 | -0.09794 | -0.22738 | -0.30218 | -0.15258 | 3.28E-09 | 13544 | 0.067 |
|             | DHA       | GCKR    | rs1260326-T  | 0.05949  | 0.03460  | 0.08438  | 0.35941  | 0.20902  | 0.50980  | 3.60E-06 | 13499 | 0.364 |
|             |           | GCKR    | rs780094-T   | 0.05483  | 0.03011  | 0.07955  | 0.33127  | 0.18190  | 0.48064  | 1.71E-05 | 13499 | 0.370 |
|             |           | LYPLAL1 | rs12137855-C | -0.00795 | -0.03529 | 0.01939  | -0.04170 | -0.18510 | 0.10171  | 0.57276  | 13498 | 0.733 |
|             |           | PNPLA3  | rs738409-G   | 0.00304  | -0.02566 | 0.03175  | 0.00259  | -0.02183 | 0.02701  | 0.83697  | 13494 | 0.234 |
|             |           | TM6SF2  | rs58542926-T | -0.14223 | -0.19136 | -0.09311 | -0.22160 | -0.29813 | -0.14506 | 1.99E-08 | 13495 | 0.063 |
|             |           | NCAN    | rs2228603-T  | -0.13012 | -0.17818 | -0.08207 | -0.20273 | -0.27761 | -0.12785 | 1.53E-07 | 13499 | 0.067 |
|             | FAw6      | GCKR    | rs1260326-T  | 0.07798  | 0.05305  | 0.10292  | 0.47114  | 0.32048  | 0.62179  | 9.73E-10 | 13506 | 0.363 |
|             |           | GCKR    | rs780094-T   | 0.07358  | 0.04882  | 0.09835  | 0.44458  | 0.29494  | 0.59421  | 6.32E-09 | 13506 | 0.370 |
|             |           | LYPLAL1 | rs12137855-C | 0.01829  | -0.00913 | 0.04570  | 0.09593  | -0.04789 | 0.23976  | 0.19189  | 13505 | 0.733 |
|             |           | PNPLA3  | rs738409-G   | 0.03542  | 0.00661  | 0.06423  | 0.03013  | 0.00562  | 0.05464  | 0.01618  | 13500 | 0.233 |

|            |              |         |              |          |          |          |          |          |          |          |       |       |
|------------|--------------|---------|--------------|----------|----------|----------|----------|----------|----------|----------|-------|-------|
|            |              | TM6SF2  | rs58542926-T | -0.12541 | -0.17473 | -0.07609 | -0.19538 | -0.27222 | -0.11854 | 6.66E-07 | 13502 | 0.063 |
|            |              | NCAN    | rs2228603-T  | -0.11232 | -0.16048 | -0.06417 | -0.17499 | -0.25002 | -0.09997 | 5.11E-06 | 13506 | 0.067 |
|            | LA           | GCKR    | rs1260326-T  | 0.08218  | 0.05731  | 0.10705  | 0.49650  | 0.34623  | 0.64677  | 1.28E-10 | 13527 | 0.363 |
|            |              | GCKR    | rs780094-T   | 0.07620  | 0.05149  | 0.10091  | 0.46040  | 0.31112  | 0.60968  | 1.95E-09 | 13527 | 0.370 |
|            |              | LYPLAL1 | rs12137855-C | 0.01220  | -0.01515 | 0.03955  | 0.06399  | -0.07950 | 0.20748  | 0.38511  | 13526 | 0.733 |
|            |              | PNPLA3  | rs738409-G   | 0.03605  | 0.00730  | 0.06480  | 0.03067  | 0.00621  | 0.05512  | 0.01463  | 13523 | 0.234 |
|            |              | TM6SF2  | rs58542926-T | -0.11494 | -0.16418 | -0.06570 | -0.17908 | -0.25579 | -0.10236 | 5.54E-06 | 13523 | 0.063 |
|            |              | NCAN    | rs2228603-T  | -0.10650 | -0.15455 | -0.05845 | -0.16592 | -0.24078 | -0.09106 | 1.61E-05 | 13527 | 0.067 |
|            | otPUFA       | GCKR    | rs1260326-T  | 0.07775  | 0.05292  | 0.10258  | 0.46974  | 0.31972  | 0.61977  | 1.13E-09 | 13549 | 0.363 |
|            |              | GCKR    | rs780094-T   | 0.07181  | 0.04714  | 0.09648  | 0.43385  | 0.28482  | 0.58288  | 1.49E-08 | 13549 | 0.370 |
|            |              | LYPLAL1 | rs12137855-C | 0.00058  | -0.02673 | 0.02788  | 0.00302  | -0.14021 | 0.14625  | 0.96730  | 13548 | 0.733 |
|            |              | PNPLA3  | rs738409-G   | 0.01385  | -0.01482 | 0.04252  | 0.01178  | -0.01261 | 0.03617  | 0.34699  | 13545 | 0.234 |
|            |              | TM6SF2  | rs58542926-T | -0.18289 | -0.23197 | -0.13381 | -0.28494 | -0.36140 | -0.20848 | 4.22E-13 | 13545 | 0.063 |
|            |              | NCAN    | rs2228603-T  | -0.15896 | -0.20690 | -0.11103 | -0.24766 | -0.32235 | -0.17298 | 1.12E-10 | 13549 | 0.067 |
|            | MUFA         | GCKR    | rs1260326-T  | 0.11754  | 0.09274  | 0.14234  | 0.71014  | 0.56032  | 0.85997  | 3.53E-20 | 13535 | 0.363 |
|            |              | GCKR    | rs780094-T   | 0.10966  | 0.08502  | 0.13430  | 0.66252  | 0.51364  | 0.81139  | 5.68E-18 | 13535 | 0.370 |
|            |              | LYPLAL1 | rs12137855-C | 0.02773  | 0.00042  | 0.05503  | 0.14546  | 0.00221  | 0.28871  | 0.04856  | 13534 | 0.733 |
|            |              | PNPLA3  | rs738409-G   | 0.03391  | 0.00522  | 0.06260  | 0.02885  | 0.00444  | 0.05325  | 0.02169  | 13532 | 0.234 |
|            |              | TM6SF2  | rs58542926-T | -0.14832 | -0.19745 | -0.09919 | -0.23109 | -0.30763 | -0.15454 | 4.62E-09 | 13531 | 0.063 |
|            |              | NCAN    | rs2228603-T  | -0.12725 | -0.17522 | -0.07928 | -0.19826 | -0.27299 | -0.12352 | 2.61E-07 | 13535 | 0.067 |
|            | FAw79S       | GCKR    | rs1260326-T  | 0.11490  | 0.09008  | 0.13972  | 0.69422  | 0.54426  | 0.84417  | 1.95E-19 | 13506 | 0.363 |
|            |              | GCKR    | rs780094-T   | 0.10653  | 0.08187  | 0.13119  | 0.64363  | 0.49465  | 0.79261  | 3.98E-17 | 13506 | 0.370 |
|            |              | LYPLAL1 | rs12137855-C | 0.02509  | -0.00228 | 0.05247  | 0.13163  | -0.01197 | 0.27523  | 0.07403  | 13505 | 0.733 |
|            |              | PNPLA3  | rs738409-G   | 0.03557  | 0.00681  | 0.06434  | 0.03026  | 0.00579  | 0.05473  | 0.01597  | 13500 | 0.233 |
|            |              | TM6SF2  | rs58542926-T | -0.14849 | -0.19772 | -0.09926 | -0.23135 | -0.30805 | -0.15465 | 4.26E-09 | 13502 | 0.063 |
|            |              | NCAN    | rs2228603-T  | -0.12696 | -0.17496 | -0.07895 | -0.19779 | -0.27259 | -0.12300 | 2.60E-07 | 13506 | 0.067 |
|            | FALen        | GCKR    | rs1260326-T  | -0.04157 | -0.06639 | -0.01674 | -0.25114 | -0.40115 | -0.10114 | 0.00111  | 13476 | 0.363 |
|            |              | GCKR    | rs780094-T   | -0.04275 | -0.06741 | -0.01809 | -0.25829 | -0.40726 | -0.10931 | 0.00074  | 13476 | 0.370 |
|            |              | LYPLAL1 | rs12137855-C | -0.01404 | -0.04137 | 0.01328  | -0.07366 | -0.21700 | 0.06968  | 0.31678  | 13475 | 0.733 |
|            |              | PNPLA3  | rs738409-G   | -0.00229 | -0.03102 | 0.02645  | -0.00194 | -0.02639 | 0.02250  | 0.87680  | 13470 | 0.233 |
|            |              | TM6SF2  | rs58542926-T | -0.00073 | -0.04995 | 0.04850  | -0.00113 | -0.07782 | 0.07556  | 0.97703  | 13472 | 0.063 |
|            |              | NCAN    | rs2228603-T  | -0.01673 | -0.06470 | 0.03123  | -0.02607 | -0.10080 | 0.04866  | 0.49674  | 13476 | 0.067 |
| Saturation | Bis.DB.ratio | GCKR    | rs1260326-T  | -0.06379 | -0.08861 | -0.03897 | -0.38539 | -0.53534 | -0.23543 | 5.89E-07 | 13524 | 0.363 |
|            |              | GCKR    | rs780094-T   | -0.06085 | -0.08551 | -0.03620 | -0.36765 | -0.51660 | -0.21871 | 1.61E-06 | 13524 | 0.370 |
|            |              | LYPLAL1 | rs12137855-C | -0.03757 | -0.06488 | -0.01025 | -0.19708 | -0.34037 | -0.05378 | 0.00749  | 13523 | 0.733 |
|            |              | PNPLA3  | rs738409-G   | -0.02658 | -0.05529 | 0.00214  | -0.02261 | -0.04703 | 0.00182  | 0.07185  | 13520 | 0.234 |
|            |              | TM6SF2  | rs58542926-T | 0.00922  | -0.04002 | 0.05845  | 0.01436  | -0.06235 | 0.09107  | 0.71581  | 13520 | 0.063 |
|            |              | NCAN    | rs2228603-T  | -0.00050 | -0.04849 | 0.04748  | -0.00078 | -0.07554 | 0.07397  | 0.98372  | 13524 | 0.067 |
|            | Bis.FA.ratio | GCKR    | rs1260326-T  | -0.07096 | -0.09611 | -0.04580 | -0.42870 | -0.58067 | -0.27673 | 4.04E-08 | 13171 | 0.363 |
|            |              | GCKR    | rs780094-T   | -0.06912 | -0.09411 | -0.04413 | -0.41759 | -0.56856 | -0.26663 | 7.34E-08 | 13171 | 0.370 |
|            |              | LYPLAL1 | rs12137855-C | -0.02795 | -0.05564 | -0.00027 | -0.14665 | -0.29186 | -0.00143 | 0.04925  | 13170 | 0.733 |

|                |              |         |              |          |          |          |          |          |          |          |       |       |
|----------------|--------------|---------|--------------|----------|----------|----------|----------|----------|----------|----------|-------|-------|
|                |              | PNPLA3  | rs738409-G   | -0.01832 | -0.04738 | 0.01074  | -0.01559 | -0.04031 | 0.00913  | 0.21948  | 13166 | 0.233 |
|                |              | TM6SF2  | rs58542926-T | -0.02069 | -0.07048 | 0.02911  | -0.03223 | -0.10980 | 0.04535  | 0.41852  | 13167 | 0.063 |
|                |              | NCAN    | rs2228603-T  | -0.03041 | -0.07905 | 0.01823  | -0.04738 | -0.12315 | 0.02840  | 0.22339  | 13171 | 0.067 |
|                | CH2.DB.ratio | GCKR    | rs1260326-T  | 0.05580  | 0.03096  | 0.08063  | 0.33710  | 0.18706  | 0.48714  | 1.15E-05 | 13532 | 0.363 |
|                |              | GCKR    | rs780094-T   | 0.05317  | 0.02851  | 0.07784  | 0.32126  | 0.17223  | 0.47029  | 2.57E-05 | 13532 | 0.370 |
|                |              | LYPLAL1 | rs12137855-C | 0.01373  | -0.01355 | 0.04101  | 0.07202  | -0.07110 | 0.21514  | 0.32552  | 13531 | 0.733 |
|                |              | PNPLA3  | rs738409-G   | 0.01705  | -0.01164 | 0.04574  | 0.01450  | -0.00991 | 0.03891  | 0.24574  | 13527 | 0.234 |
|                |              | TM6SF2  | rs58542926-T | 0.03314  | -0.01604 | 0.08232  | 0.05163  | -0.02498 | 0.12825  | 0.18796  | 13528 | 0.063 |
|                |              | NCAN    | rs2228603-T  | 0.04231  | -0.00567 | 0.09029  | 0.06592  | -0.00884 | 0.14067  | 0.08494  | 13532 | 0.067 |
|                | DB.in.FA     | GCKR    | rs1260326-T  | -0.06135 | -0.08619 | -0.03651 | -0.37067 | -0.52074 | -0.22060 | 1.31E-06 | 13501 | 0.363 |
|                |              | GCKR    | rs780094-T   | -0.05957 | -0.08424 | -0.03490 | -0.35990 | -0.50895 | -0.21084 | 2.26E-06 | 13501 | 0.370 |
|                |              | LYPLAL1 | rs12137855-C | -0.01330 | -0.03914 | 0.01254  | -0.06977 | -0.20531 | 0.06577  | 0.31299  | 15727 | 0.743 |
|                |              | PNPLA3  | rs738409-G   | -0.01208 | -0.04080 | 0.01664  | -0.01028 | -0.03471 | 0.01415  | 0.40953  | 13495 | 0.233 |
|                |              | TM6SF2  | rs58542926-T | -0.02395 | -0.06944 | 0.02154  | -0.03732 | -0.10818 | 0.03355  | 0.30203  | 15724 | 0.065 |
|                |              | NCAN    | rs2228603-T  | -0.03468 | -0.07967 | 0.01030  | -0.05404 | -0.12412 | 0.01605  | 0.13074  | 15728 | 0.068 |
|                | CH2.in.FA    | GCKR    | rs1260326-T  | 0.05236  | 0.02967  | 0.07506  | 0.31637  | 0.17922  | 0.45351  | 6.23E-06 | 16794 | 0.360 |
|                |              | GCKR    | rs780094-T   | 0.05006  | 0.02749  | 0.07263  | 0.30244  | 0.16607  | 0.43882  | 1.40E-05 | 16794 | 0.365 |
|                |              | LYPLAL1 | rs12137855-C | 0.00144  | -0.02279 | 0.02567  | 0.00755  | -0.11956 | 0.13466  | 0.90730  | 19020 | 0.757 |
|                |              | PNPLA3  | rs738409-G   | 0.00931  | -0.01727 | 0.03588  | 0.00792  | -0.01469 | 0.03052  | 0.49261  | 16788 | 0.228 |
|                |              | TM6SF2  | rs58542926-T | -0.00801 | -0.05260 | 0.03658  | -0.01248 | -0.08195 | 0.05699  | 0.72480  | 17825 | 0.065 |
|                |              | NCAN    | rs2228603-T  | 0.00112  | -0.04320 | 0.04543  | 0.00174  | -0.06730 | 0.07078  | 0.96063  | 17829 | 0.067 |
| Beta-oxidation | AcAce        | GCKR    | rs1260326-T  | 0.01539  | -0.00557 | 0.03634  | 0.09295  | -0.03366 | 0.21957  | 0.15228  | 19262 | 0.363 |
|                |              | GCKR    | rs780094-T   | 0.01593  | -0.00492 | 0.03677  | 0.09622  | -0.02973 | 0.22217  | 0.13633  | 19262 | 0.369 |
|                |              | LYPLAL1 | rs12137855-C | 0.00329  | -0.02104 | 0.02761  | 0.01724  | -0.11035 | 0.14484  | 0.79217  | 16867 | 0.733 |
|                |              | PNPLA3  | rs738409-G   | 0.00223  | -0.02192 | 0.02639  | 0.00190  | -0.01865 | 0.02245  | 0.85687  | 19257 | 0.231 |
|                |              | TM6SF2  | rs58542926-T | -0.05347 | -0.09490 | -0.01203 | -0.08330 | -0.14785 | -0.01875 | 0.01188  | 19257 | 0.063 |
|                |              | NCAN    | rs2228603-T  | -0.05056 | -0.09111 | -0.01001 | -0.07877 | -0.14195 | -0.01560 | 0.01507  | 19262 | 0.068 |
|                | Ace          | GCKR    | rs1260326-T  | -0.02911 | -0.04880 | -0.00942 | -0.17586 | -0.29481 | -0.05691 | 0.00377  | 22521 | 0.361 |
|                |              | GCKR    | rs780094-T   | -0.03089 | -0.05048 | -0.01130 | -0.18661 | -0.30495 | -0.06826 | 0.00201  | 22521 | 0.366 |
|                |              | LYPLAL1 | rs12137855-C | 0.00313  | -0.01784 | 0.02410  | 0.01641  | -0.09360 | 0.12643  | 0.76996  | 24744 | 0.750 |
|                |              | PNPLA3  | rs738409-G   | 0.00737  | -0.01554 | 0.03028  | 0.00627  | -0.01322 | 0.02576  | 0.52817  | 22517 | 0.227 |
|                |              | TM6SF2  | rs58542926-T | -0.00287 | -0.04142 | 0.03568  | -0.00447 | -0.06453 | 0.05559  | 0.88405  | 23552 | 0.064 |
|                |              | NCAN    | rs2228603-T  | 0.01127  | -0.02696 | 0.04949  | 0.01755  | -0.04200 | 0.07711  | 0.56349  | 23554 | 0.067 |
|                | bOHBut       | GCKR    | rs1260326-T  | -0.01671 | -0.03820 | 0.00479  | -0.10093 | -0.23079 | 0.02893  | 0.12766  | 18712 | 0.363 |
|                |              | GCKR    | rs780094-T   | -0.02009 | -0.04151 | 0.00133  | -0.12138 | -0.25079 | 0.00803  | 0.06601  | 18712 | 0.367 |
|                |              | LYPLAL1 | rs12137855-C | -0.00428 | -0.02717 | 0.01861  | -0.02244 | -0.14252 | 0.09763  | 0.71417  | 20935 | 0.755 |
|                |              | PNPLA3  | rs738409-G   | 0.00658  | -0.01651 | 0.02967  | 0.00559  | -0.01405 | 0.02524  | 0.57665  | 21923 | 0.227 |
|                |              | TM6SF2  | rs58542926-T | 0.00143  | -0.03764 | 0.04050  | 0.00223  | -0.05864 | 0.06310  | 0.94270  | 22958 | 0.064 |
|                |              | NCAN    | rs2228603-T  | -0.00264 | -0.04501 | 0.03973  | -0.00411 | -0.07012 | 0.06190  | 0.90288  | 19746 | 0.067 |
| Glycolysis     | Glc          | GCKR    | rs1260326-T  | -0.02390 | -0.04363 | -0.00416 | -0.14437 | -0.26359 | -0.02516 | 0.01776  | 22452 | 0.361 |
|                |              | GCKR    | rs780094-T   | -0.02442 | -0.04406 | -0.00478 | -0.14755 | -0.26621 | -0.02890 | 0.01493  | 22452 | 0.366 |



|             |      |         |              |          |          |          |          |          |          |          |       |       |
|-------------|------|---------|--------------|----------|----------|----------|----------|----------|----------|----------|-------|-------|
|             |      | LYPLAL1 | rs12137855-C | 0.00107  | -0.01983 | 0.02196  | 0.00561  | -0.10401 | 0.11523  | 0.92019  | 24674 | 0.750 |
|             |      | PNPLA3  | rs738409-G   | 0.02413  | 0.00117  | 0.04709  | 0.02053  | 0.00099  | 0.04006  | 0.03966  | 22446 | 0.227 |
|             |      | TM6SF2  | rs58542926-T | -0.03045 | -0.06897 | 0.00807  | -0.04744 | -0.10745 | 0.01257  | 0.12166  | 23483 | 0.064 |
|             |      | NCAN    | rs2228603-T  | -0.04034 | -0.07857 | -0.00211 | -0.06285 | -0.12242 | -0.00328 | 0.03888  | 23487 | 0.067 |
|             | Lac  | GCKR    | rs1260326-T  | 0.05771  | 0.03818  | 0.07725  | 0.34869  | 0.23065  | 0.46673  | 7.23E-09 | 22644 | 0.361 |
|             |      | GCKR    | rs780094-T   | 0.05483  | 0.03538  | 0.07428  | 0.33125  | 0.21373  | 0.44877  | 3.37E-08 | 22644 | 0.365 |
|             |      | LYPLAL1 | rs12137855-C | 0.01820  | -0.00263 | 0.03902  | 0.09545  | -0.01382 | 0.20472  | 0.08687  | 24866 | 0.751 |
|             |      | PNPLA3  | rs738409-G   | 0.00783  | -0.01489 | 0.03054  | 0.00666  | -0.01266 | 0.02598  | 0.49933  | 22638 | 0.227 |
|             |      | TM6SF2  | rs58542926-T | 0.00569  | -0.03265 | 0.04403  | 0.00887  | -0.05086 | 0.06860  | 0.77099  | 23675 | 0.064 |
|             |      | NCAN    | rs2228603-T  | -0.00397 | -0.04200 | 0.03406  | -0.00618 | -0.06543 | 0.05307  | 0.83795  | 23677 | 0.067 |
|             | Pyr  | GCKR    | rs1260326-T  | 0.08080  | 0.06127  | 0.10034  | 0.48818  | 0.37015  | 0.60621  | 5.47E-16 | 22529 | 0.361 |
|             |      | GCKR    | rs780094-T   | 0.07820  | 0.05875  | 0.09764  | 0.47244  | 0.35495  | 0.58992  | 3.38E-15 | 22529 | 0.366 |
|             |      | LYPLAL1 | rs12137855-C | 0.01043  | -0.01036 | 0.03123  | 0.05473  | -0.05436 | 0.16381  | 0.32543  | 24751 | 0.751 |
|             |      | PNPLA3  | rs738409-G   | -0.00317 | -0.02590 | 0.01955  | -0.00270 | -0.02203 | 0.01663  | 0.78444  | 22525 | 0.227 |
|             |      | TM6SF2  | rs58542926-T | -0.03700 | -0.07535 | 0.00135  | -0.05765 | -0.11739 | 0.00210  | 0.05860  | 23559 | 0.064 |
|             |      | NCAN    | rs2228603-T  | -0.03900 | -0.07706 | -0.00095 | -0.06077 | -0.12006 | -0.00148 | 0.04458  | 23563 | 0.067 |
|             | Cit  | GCKR    | rs1260326-T  | -0.03230 | -0.05192 | -0.01269 | -0.19517 | -0.31370 | -0.07665 | 0.00126  | 22543 | 0.361 |
|             |      | GCKR    | rs780094-T   | -0.02994 | -0.04946 | -0.01042 | -0.18088 | -0.29882 | -0.06293 | 0.00266  | 22543 | 0.366 |
|             |      | LYPLAL1 | rs12137855-C | -0.00561 | -0.02650 | 0.01528  | -0.02942 | -0.13903 | 0.08018  | 0.59878  | 24766 | 0.751 |
|             |      | PNPLA3  | rs738409-G   | 0.03416  | 0.01131  | 0.05700  | 0.02905  | 0.00962  | 0.04849  | 0.00340  | 22539 | 0.227 |
|             |      | TM6SF2  | rs58542926-T | 0.04256  | 0.00413  | 0.08099  | 0.06630  | 0.00643  | 0.12617  | 0.03000  | 23573 | 0.064 |
|             |      | NCAN    | rs2228603-T  | 0.04436  | 0.00623  | 0.08248  | 0.06910  | 0.00970  | 0.12851  | 0.02262  | 23577 | 0.067 |
|             | Glol | GCKR    | rs1260326-T  | 0.05772  | 0.03564  | 0.07980  | 0.34872  | 0.21530  | 0.48215  | 3.07E-07 | 18008 | 0.359 |
|             |      | GCKR    | rs780094-T   | 0.04896  | 0.02698  | 0.07094  | 0.29581  | 0.16303  | 0.42859  | 1.28E-05 | 18008 | 0.363 |
|             |      | LYPLAL1 | rs12137855-C | 0.01697  | -0.00639 | 0.04034  | 0.08904  | -0.03353 | 0.21162  | 0.15447  | 20233 | 0.755 |
|             |      | PNPLA3  | rs738409-G   | 0.00901  | -0.01664 | 0.03466  | 0.00767  | -0.01415 | 0.02948  | 0.49105  | 18007 | 0.229 |
|             |      | TM6SF2  | rs58542926-T | -0.08953 | -0.13306 | -0.04600 | -0.13948 | -0.20730 | -0.07166 | 5.61E-05 | 19042 | 0.063 |
|             |      | NCAN    | rs2228603-T  | -0.09122 | -0.13428 | -0.04816 | -0.14212 | -0.20921 | -0.07503 | 3.34E-05 | 19043 | 0.065 |
| Amino acids | Ala  | GCKR    | rs1260326-T  | 0.10458  | 0.08510  | 0.12406  | 0.63186  | 0.51415  | 0.74957  | 7.40E-26 | 22569 | 0.361 |
|             |      | GCKR    | rs780094-T   | 0.09731  | 0.07791  | 0.11671  | 0.58791  | 0.47069  | 0.70514  | 8.95E-23 | 22569 | 0.366 |
|             |      | LYPLAL1 | rs12137855-C | 0.00762  | -0.01327 | 0.02850  | 0.03997  | -0.06960 | 0.14954  | 0.47462  | 24791 | 0.750 |
|             |      | PNPLA3  | rs738409-G   | 0.02221  | -0.00057 | 0.04499  | 0.01889  | -0.00048 | 0.03827  | 0.05599  | 22564 | 0.227 |
|             |      | TM6SF2  | rs58542926-T | -0.05151 | -0.08986 | -0.01315 | -0.08025 | -0.14001 | -0.02049 | 0.00850  | 23599 | 0.064 |
|             |      | NCAN    | rs2228603-T  | -0.04692 | -0.08501 | -0.00883 | -0.07310 | -0.13244 | -0.01376 | 0.01578  | 23604 | 0.067 |
|             | Gln  | GCKR    | rs1260326-T  | -0.06167 | -0.08143 | -0.04191 | -0.37257 | -0.49196 | -0.25318 | 9.87E-10 | 22235 | 0.361 |
|             |      | GCKR    | rs780094-T   | -0.05922 | -0.07889 | -0.03954 | -0.35776 | -0.47663 | -0.23889 | 3.75E-09 | 22235 | 0.365 |
|             |      | LYPLAL1 | rs12137855-C | 0.01308  | -0.00803 | 0.03418  | 0.06860  | -0.04211 | 0.17931  | 0.22453  | 24457 | 0.751 |
|             |      | PNPLA3  | rs738409-G   | 0.02546  | 0.00240  | 0.04852  | 0.02166  | 0.00204  | 0.04128  | 0.03051  | 22231 | 0.227 |
|             |      | TM6SF2  | rs58542926-T | -0.00584 | -0.04463 | 0.03294  | -0.00910 | -0.06953 | 0.05132  | 0.76783  | 23264 | 0.064 |
|             |      | NCAN    | rs2228603-T  | -0.00381 | -0.04233 | 0.03472  | -0.00593 | -0.06594 | 0.05409  | 0.84648  | 23269 | 0.067 |
|             | Gly  | GCKR    | rs1260326-T  | -0.00603 | -0.02876 | 0.01670  | -0.03644 | -0.17377 | 0.10089  | 0.60307  | 16507 | 0.365 |

|     |         |              |          |          |          |          |          |          |          |       |       |
|-----|---------|--------------|----------|----------|----------|----------|----------|----------|----------|-------|-------|
| His | GCKR    | rs780094-T   | -0.00221 | -0.02487 | 0.02045  | -0.01335 | -0.15023 | 0.12353  | 0.84840  | 16507 | 0.371 |
|     | LYPLAL1 | rs12137855-C | 0.02417  | 0.00011  | 0.04822  | 0.12677  | 0.00059  | 0.25295  | 0.04894  | 18732 | 0.749 |
|     | PNPLA3  | rs738409-G   | 0.00687  | -0.01934 | 0.03309  | 0.00585  | -0.01645 | 0.02814  | 0.60741  | 16504 | 0.228 |
|     | TM6SF2  | rs58542926-T | -0.01780 | -0.06171 | 0.02611  | -0.02773 | -0.09614 | 0.04068  | 0.42694  | 17539 | 0.064 |
|     | NCAN    | rs2228603-T  | -0.01008 | -0.05334 | 0.03318  | -0.01570 | -0.08311 | 0.05170  | 0.64794  | 17542 | 0.068 |
|     | GCKR    | rs1260326-T  | -0.02611 | -0.04695 | -0.00526 | -0.15773 | -0.28368 | -0.03178 | 0.01467  | 19244 | 0.363 |
|     | GCKR    | rs780094-T   | -0.03076 | -0.05149 | -0.01002 | -0.18582 | -0.31112 | -0.06052 | 0.00386  | 19244 | 0.369 |
|     | LYPLAL1 | rs12137855-C | 0.00322  | -0.01953 | 0.02596  | 0.01688  | -0.10243 | 0.13618  | 0.78280  | 19240 | 0.732 |
|     | PNPLA3  | rs738409-G   | 0.02971  | 0.00565  | 0.05378  | 0.02528  | 0.00481  | 0.04574  | 0.01611  | 19239 | 0.231 |
|     | TM6SF2  | rs58542926-T | -0.07277 | -0.11406 | -0.03147 | -0.11337 | -0.17771 | -0.04902 | 0.00060  | 19239 | 0.063 |
| Ile | NCAN    | rs2228603-T  | -0.05552 | -0.09590 | -0.01514 | -0.08650 | -0.14941 | -0.02359 | 0.00738  | 19244 | 0.068 |
|     | GCKR    | rs1260326-T  | 0.08568  | 0.06621  | 0.10515  | 0.51765  | 0.40001  | 0.63528  | 9.75E-18 | 22549 | 0.361 |
|     | GCKR    | rs780094-T   | 0.08071  | 0.06132  | 0.10010  | 0.48763  | 0.37046  | 0.60481  | 5.00E-16 | 22549 | 0.366 |
|     | LYPLAL1 | rs12137855-C | 0.00636  | -0.01447 | 0.02720  | 0.03338  | -0.07593 | 0.14269  | 0.55140  | 24771 | 0.750 |
|     | PNPLA3  | rs738409-G   | 0.01558  | -0.00714 | 0.03829  | 0.01325  | -0.00608 | 0.03258  | 0.18108  | 22545 | 0.227 |
|     | TM6SF2  | rs58542926-T | -0.06207 | -0.10035 | -0.02379 | -0.09670 | -0.15634 | -0.03706 | 0.00157  | 23579 | 0.064 |
|     | NCAN    | rs2228603-T  | -0.05574 | -0.09380 | -0.01768 | -0.08684 | -0.14614 | -0.02754 | 0.00430  | 23584 | 0.067 |
|     | GCKR    | rs1260326-T  | 0.07981  | 0.06033  | 0.09928  | 0.48218  | 0.36451  | 0.59985  | 1.07E-15 | 22500 | 0.361 |
|     | GCKR    | rs780094-T   | 0.07411  | 0.05470  | 0.09352  | 0.44777  | 0.33050  | 0.56504  | 7.90E-14 | 22501 | 0.365 |
|     | LYPLAL1 | rs12137855-C | 0.00881  | -0.01207 | 0.02970  | 0.04623  | -0.06333 | 0.15580  | 0.40862  | 24724 | 0.751 |
| Leu | PNPLA3  | rs738409-G   | 0.01445  | -0.00826 | 0.03717  | 0.01230  | -0.00703 | 0.03162  | 0.21262  | 22497 | 0.227 |
|     | TM6SF2  | rs58542926-T | -0.04177 | -0.08015 | -0.00338 | -0.06507 | -0.12487 | -0.00527 | 0.03311  | 23531 | 0.064 |
|     | NCAN    | rs2228603-T  | -0.04208 | -0.08014 | -0.00401 | -0.06555 | -0.12486 | -0.00625 | 0.03041  | 23535 | 0.067 |
|     | GCKR    | rs1260326-T  | 0.05174  | 0.03237  | 0.07112  | 0.31262  | 0.19557  | 0.42966  | 1.68E-07 | 22673 | 0.361 |
|     | GCKR    | rs780094-T   | 0.04584  | 0.02653  | 0.06515  | 0.27693  | 0.16026  | 0.39360  | 3.33E-06 | 22673 | 0.365 |
|     | LYPLAL1 | rs12137855-C | 0.00058  | -0.02019 | 0.02134  | 0.00303  | -0.10590 | 0.11196  | 0.95655  | 24895 | 0.751 |
|     | PNPLA3  | rs738409-G   | 0.00526  | -0.01735 | 0.02787  | 0.00448  | -0.01476 | 0.02371  | 0.64830  | 22669 | 0.227 |
|     | TM6SF2  | rs58542926-T | -0.02868 | -0.06694 | 0.00958  | -0.04468 | -0.10429 | 0.01492  | 0.14175  | 23703 | 0.064 |
|     | NCAN    | rs2228603-T  | -0.03445 | -0.07238 | 0.00347  | -0.05368 | -0.11277 | 0.00541  | 0.07500  | 23707 | 0.067 |
|     | GCKR    | rs1260326-T  | 0.01705  | -0.00323 | 0.03733  | 0.10302  | -0.01952 | 0.22556  | 0.10028  | 20436 | 0.363 |
| Phe | GCKR    | rs780094-T   | 0.01415  | -0.00607 | 0.03437  | 0.08550  | -0.03667 | 0.20768  | 0.17120  | 20436 | 0.368 |
|     | LYPLAL1 | rs12137855-C | 0.01779  | -0.00370 | 0.03928  | 0.09332  | -0.01942 | 0.20607  | 0.10561  | 22658 | 0.744 |
|     | PNPLA3  | rs738409-G   | 0.03516  | 0.01159  | 0.05873  | 0.02991  | 0.00986  | 0.04996  | 0.00356  | 20432 | 0.227 |
|     | TM6SF2  | rs58542926-T | 0.00979  | -0.02933 | 0.04892  | 0.01525  | -0.04570 | 0.07621  | 0.62466  | 21466 | 0.064 |
|     | NCAN    | rs2228603-T  | 0.00301  | -0.03564 | 0.04165  | 0.00469  | -0.05552 | 0.06489  | 0.87902  | 21470 | 0.068 |
|     | GCKR    | rs1260326-T  | 0.00505  | -0.01435 | 0.02446  | 0.03052  | -0.08671 | 0.14776  | 0.60985  | 22698 | 0.361 |
|     | GCKR    | rs780094-T   | 0.00112  | -0.01819 | 0.02043  | 0.00677  | -0.10988 | 0.12341  | 0.90946  | 22698 | 0.366 |
|     | LYPLAL1 | rs12137855-C | 0.00691  | -0.01389 | 0.02771  | 0.03624  | -0.07288 | 0.14537  | 0.51508  | 24921 | 0.751 |
|     | PNPLA3  | rs738409-G   | 0.04021  | 0.01761  | 0.06281  | 0.03420  | 0.01498  | 0.05343  | 0.00049  | 22693 | 0.227 |
|     | TM6SF2  | rs58542926-T | 0.00520  | -0.03310 | 0.04350  | 0.00810  | -0.05157 | 0.06778  | 0.79019  | 23728 | 0.064 |
| Tyr | NCAN    | rs2228603-T  | 0.00329  | -0.03468 | 0.04126  | 0.00513  | -0.05403 | 0.06429  | 0.86509  | 23732 | 0.067 |

|              |            |              |              |          |          |          |          |          |          |          |       |       |
|--------------|------------|--------------|--------------|----------|----------|----------|----------|----------|----------|----------|-------|-------|
| Total lipids | XXL.VLDL.L | GCKR         | rs1260326-T  | 0.07414  | 0.05311  | 0.09517  | 0.44794  | 0.32087  | 0.57502  | 6.52E-12 | 18960 | 0.363 |
|              |            | GCKR         | rs780094-T   | 0.07087  | 0.04994  | 0.09180  | 0.42819  | 0.30174  | 0.55464  | 4.17E-11 | 18960 | 0.369 |
|              |            | LYPLAL1      | rs12137855-C | 0.02401  | 0.00107  | 0.04695  | 0.12594  | 0.00560  | 0.24628  | 0.04131  | 18955 | 0.733 |
|              |            | PNPLA3       | rs738409-G   | 0.00363  | -0.02063 | 0.02790  | 0.00309  | -0.01755 | 0.02373  | 0.77045  | 18955 | 0.231 |
|              |            | TM6SF2       | rs58542926-T | -0.11581 | -0.15740 | -0.07422 | -0.18043 | -0.24523 | -0.11564 | 5.78E-08 | 18955 | 0.063 |
|              |            | NCAN         | rs2228603-T  | -0.10146 | -0.14223 | -0.06069 | -0.15807 | -0.22159 | -0.09455 | 1.24E-06 | 18960 | 0.068 |
|              | XL.VLDL.L  | GCKR         | rs1260326-T  | 0.08411  | 0.06330  | 0.10493  | 0.50820  | 0.38242  | 0.63397  | 4.43E-15 | 19273 | 0.363 |
|              |            | GCKR         | rs780094-T   | 0.07948  | 0.05877  | 0.10020  | 0.48022  | 0.35507  | 0.60536  | 9.51E-14 | 19273 | 0.370 |
|              |            | LYPLAL1      | rs12137855-C | 0.02274  | 0.00003  | 0.04545  | 0.11930  | 0.00018  | 0.23842  | 0.05177  | 19268 | 0.732 |
|              |            | PNPLA3       | rs738409-G   | 0.00561  | -0.01843 | 0.02965  | 0.00477  | -0.01568 | 0.02522  | 0.65026  | 19268 | 0.231 |
|              |            | TM6SF2       | rs58542926-T | -0.13949 | -0.18069 | -0.09829 | -0.21733 | -0.28151 | -0.15314 | 5.00E-11 | 19268 | 0.063 |
|              |            | NCAN         | rs2228603-T  | -0.12107 | -0.16141 | -0.08073 | -0.18862 | -0.25147 | -0.12578 | 5.72E-09 | 19273 | 0.068 |
|              | L.VLDL.L   | GCKR         | rs1260326-T  | 0.08769  | 0.06670  | 0.10867  | 0.52978  | 0.40299  | 0.65658  | 4.90E-16 | 18960 | 0.363 |
|              |            | GCKR         | rs780094-T   | 0.08435  | 0.06346  | 0.10523  | 0.50961  | 0.38344  | 0.63579  | 4.40E-15 | 18960 | 0.369 |
|              |            | LYPLAL1      | rs12137855-C | 0.02975  | 0.00685  | 0.05266  | 0.15609  | 0.03594  | 0.27624  | 0.01160  | 18955 | 0.733 |
|              |            | PNPLA3       | rs738409-G   | 0.01480  | -0.00941 | 0.03901  | 0.01259  | -0.00800 | 0.03318  | 0.23484  | 18955 | 0.231 |
|              |            | TM6SF2       | rs58542926-T | -0.13302 | -0.17450 | -0.09153 | -0.20724 | -0.27186 | -0.14261 | 4.77E-10 | 18955 | 0.063 |
|              |            | NCAN         | rs2228603-T  | -0.10725 | -0.14793 | -0.06657 | -0.16710 | -0.23048 | -0.10372 | 3.07E-07 | 18960 | 0.068 |
|              | M.VLDL.L   | GCKR         | rs1260326-T  | 0.09624  | 0.07544  | 0.11704  | 0.58145  | 0.45581  | 0.70710  | 2.98E-19 | 19273 | 0.363 |
|              |            | GCKR         | rs780094-T   | 0.08977  | 0.06907  | 0.11046  | 0.54235  | 0.41733  | 0.66738  | 4.21E-17 | 19273 | 0.370 |
|              |            | LYPLAL1      | rs12137855-C | 0.02985  | 0.00712  | 0.05258  | 0.15659  | 0.03733  | 0.27585  | 0.01090  | 19268 | 0.732 |
|              |            | PNPLA3       | rs738409-G   | 0.01542  | -0.00864 | 0.03947  | 0.01311  | -0.00735 | 0.03358  | 0.21388  | 19268 | 0.231 |
|              |            | TM6SF2       | rs58542926-T | -0.15472 | -0.19593 | -0.11351 | -0.24105 | -0.30525 | -0.17685 | 3.43E-13 | 19268 | 0.063 |
|              |            | NCAN         | rs2228603-T  | -0.13438 | -0.17470 | -0.09407 | -0.20937 | -0.27218 | -0.14655 | 1.05E-10 | 19273 | 0.068 |
| S.VLDL.L     | GCKR       | rs1260326-T  | 0.09289      | 0.07208  | 0.11369  | 0.56119  | 0.43546  | 0.68691  | 6.64E-18 | 19273    | 0.363 |       |
|              | GCKR       | rs780094-T   | 0.08643      | 0.06572  | 0.10714  | 0.52217  | 0.39706  | 0.64728  | 7.58E-16 | 19273    | 0.370 |       |
|              | LYPLAL1    | rs12137855-C | 0.02114      | -0.00160 | 0.04387  | 0.11089  | -0.00838 | 0.23015  | 0.07235  | 19268    | 0.732 |       |
|              | PNPLA3     | rs738409-G   | 0.01672      | -0.00734 | 0.04079  | 0.01423  | -0.00624 | 0.03470  | 0.17917  | 19268    | 0.231 |       |
|              | TM6SF2     | rs58542926-T | -0.15699     | -0.19821 | -0.11576 | -0.24458 | -0.30881 | -0.18035 | 1.92E-13 | 19268    | 0.063 |       |
|              | NCAN       | rs2228603-T  | -0.13955     | -0.17988 | -0.09922 | -0.21742 | -0.28025 | -0.15459 | 2.35E-11 | 19273    | 0.068 |       |
| XS.VLDL.L    | GCKR       | rs1260326-T  | 0.05404      | 0.03314  | 0.07495  | 0.32652  | 0.20024  | 0.45280  | 5.91E-07 | 19273    | 0.363 |       |
|              | GCKR       | rs780094-T   | 0.05157      | 0.03077  | 0.07236  | 0.31156  | 0.18591  | 0.43720  | 1.67E-06 | 19273    | 0.370 |       |
|              | LYPLAL1    | rs12137855-C | 0.01156      | -0.01121 | 0.03434  | 0.06067  | -0.05882 | 0.18015  | 0.32643  | 19268    | 0.732 |       |
|              | PNPLA3     | rs738409-G   | 0.02309      | -0.00102 | 0.04720  | 0.01964  | -0.00087 | 0.04015  | 0.06415  | 19268    | 0.231 |       |
|              | TM6SF2     | rs58542926-T | -0.15043     | -0.19175 | -0.10911 | -0.23436 | -0.29874 | -0.16999 | 2.04E-12 | 19268    | 0.063 |       |
|              | NCAN       | rs2228603-T  | -0.13722     | -0.17768 | -0.09676 | -0.21379 | -0.27683 | -0.15075 | 5.73E-11 | 19273    | 0.068 |       |
| IDL.L        | GCKR       | rs1260326-T  | 0.03764      | 0.01676  | 0.05853  | 0.22742  | 0.10125  | 0.35360  | 0.00050  | 19273    | 0.363 |       |
|              | GCKR       | rs780094-T   | 0.03439      | 0.01362  | 0.05517  | 0.20779  | 0.08227  | 0.33332  | 0.00139  | 19273    | 0.370 |       |
|              | LYPLAL1    | rs12137855-C | 0.00651      | -0.01625 | 0.02928  | 0.03417  | -0.08525 | 0.15359  | 0.58033  | 19268    | 0.732 |       |
|              | PNPLA3     | rs738409-G   | 0.01669      | -0.00741 | 0.04079  | 0.01420  | -0.00630 | 0.03470  | 0.18077  | 19268    | 0.231 |       |
|              | TM6SF2     | rs58542926-T | -0.11800     | -0.15931 | -0.07669 | -0.18385 | -0.24821 | -0.11949 | 3.49E-08 | 19268    | 0.063 |       |

|          |         |              |          |          |          |          |          |          |          |       |       |
|----------|---------|--------------|----------|----------|----------|----------|----------|----------|----------|-------|-------|
| L.LDL.L  | NCAN    | rs2228603-T  | -0.10555 | -0.14597 | -0.06514 | -0.16445 | -0.22742 | -0.10149 | 4.60E-07 | 19273 | 0.068 |
|          | GCKR    | rs1260326-T  | 0.04667  | 0.02581  | 0.06753  | 0.28198  | 0.15595  | 0.40800  | 1.61E-05 | 19273 | 0.363 |
|          | GCKR    | rs780094-T   | 0.04142  | 0.02067  | 0.06217  | 0.25026  | 0.12487  | 0.37564  | 0.00012  | 19273 | 0.370 |
|          | LYPLAL1 | rs12137855-C | 0.01006  | -0.01268 | 0.03280  | 0.05280  | -0.06650 | 0.17209  | 0.39332  | 19268 | 0.732 |
|          | PNPLA3  | rs738409-G   | 0.01166  | -0.01242 | 0.03573  | 0.00991  | -0.01057 | 0.03040  | 0.35049  | 19268 | 0.231 |
|          | TM6SF2  | rs58542926-T | -0.10050 | -0.14179 | -0.05922 | -0.15658 | -0.22090 | -0.09226 | 2.70E-06 | 19268 | 0.063 |
| M.LDL.L  | NCAN    | rs2228603-T  | -0.08645 | -0.12683 | -0.04607 | -0.13469 | -0.19760 | -0.07178 | 3.67E-05 | 19273 | 0.068 |
|          | GCKR    | rs1260326-T  | 0.05731  | 0.03646  | 0.07815  | 0.34623  | 0.22029  | 0.47217  | 1.18E-07 | 19273 | 0.363 |
|          | GCKR    | rs780094-T   | 0.05045  | 0.02971  | 0.07119  | 0.30479  | 0.17948  | 0.43010  | 2.79E-06 | 19273 | 0.370 |
|          | LYPLAL1 | rs12137855-C | 0.01244  | -0.01029 | 0.03517  | 0.06526  | -0.05398 | 0.18449  | 0.29135  | 19268 | 0.732 |
|          | PNPLA3  | rs738409-G   | 0.00731  | -0.01676 | 0.03137  | 0.00622  | -0.01425 | 0.02669  | 0.55826  | 19268 | 0.231 |
|          | TM6SF2  | rs58542926-T | -0.09919 | -0.14045 | -0.05793 | -0.15454 | -0.21882 | -0.09025 | 3.63E-06 | 19268 | 0.063 |
| S.LDL.L  | NCAN    | rs2228603-T  | -0.08327 | -0.12363 | -0.04290 | -0.12973 | -0.19261 | -0.06684 | 7.05E-05 | 19273 | 0.068 |
|          | GCKR    | rs1260326-T  | 0.06956  | 0.04874  | 0.09039  | 0.42029  | 0.29446  | 0.54612  | 1.21E-10 | 19273 | 0.363 |
|          | GCKR    | rs780094-T   | 0.06227  | 0.04154  | 0.08299  | 0.37621  | 0.25100  | 0.50143  | 6.98E-09 | 19273 | 0.370 |
|          | LYPLAL1 | rs12137855-C | 0.01628  | -0.00644 | 0.03900  | 0.08542  | -0.03377 | 0.20460  | 0.16680  | 19268 | 0.732 |
|          | PNPLA3  | rs738409-G   | 0.00497  | -0.01909 | 0.02902  | 0.00423  | -0.01624 | 0.02469  | 0.69042  | 19268 | 0.231 |
|          | TM6SF2  | rs58542926-T | -0.11441 | -0.15565 | -0.07318 | -0.17826 | -0.24250 | -0.11401 | 8.88E-08 | 19268 | 0.063 |
| XL.HDL.L | NCAN    | rs2228603-T  | -0.09760 | -0.13794 | -0.05725 | -0.15205 | -0.21491 | -0.08920 | 3.11E-06 | 19273 | 0.068 |
|          | GCKR    | rs1260326-T  | -0.01738 | -0.03823 | 0.00346  | -0.10503 | -0.23094 | 0.02088  | 0.10340  | 19273 | 0.363 |
|          | GCKR    | rs780094-T   | -0.01173 | -0.03246 | 0.00901  | -0.07084 | -0.19611 | 0.05444  | 0.26955  | 19273 | 0.370 |
|          | LYPLAL1 | rs12137855-C | -0.00326 | -0.02601 | 0.01949  | -0.01711 | -0.13644 | 0.10223  | 0.77959  | 19268 | 0.732 |
|          | PNPLA3  | rs738409-G   | -0.01967 | -0.04373 | 0.00440  | -0.01673 | -0.03720 | 0.00374  | 0.11054  | 19268 | 0.231 |
|          | TM6SF2  | rs58542926-T | 0.00950  | -0.03179 | 0.05079  | 0.01480  | -0.04953 | 0.07913  | 0.65335  | 19268 | 0.063 |
| L.HDL.L  | NCAN    | rs2228603-T  | 0.01669  | -0.02368 | 0.05707  | 0.02601  | -0.03689 | 0.08891  | 0.41945  | 19273 | 0.068 |
|          | GCKR    | rs1260326-T  | -0.03082 | -0.05171 | -0.00994 | -0.18623 | -0.31239 | -0.06007 | 0.00426  | 19273 | 0.363 |
|          | GCKR    | rs780094-T   | -0.02558 | -0.04636 | -0.00480 | -0.15456 | -0.28010 | -0.02902 | 0.01711  | 19273 | 0.370 |
|          | LYPLAL1 | rs12137855-C | -0.00660 | -0.02935 | 0.01616  | -0.03460 | -0.15397 | 0.08478  | 0.57458  | 19268 | 0.732 |
|          | PNPLA3  | rs738409-G   | -0.00118 | -0.02526 | 0.02291  | -0.00100 | -0.02148 | 0.01948  | 0.92463  | 19268 | 0.231 |
|          | TM6SF2  | rs58542926-T | 0.03114  | -0.01017 | 0.07245  | 0.04852  | -0.01584 | 0.11288  | 0.14424  | 19268 | 0.063 |
| M.HDL.L  | NCAN    | rs2228603-T  | 0.03616  | -0.00426 | 0.07657  | 0.05633  | -0.00663 | 0.11929  | 0.08310  | 19273 | 0.068 |
|          | GCKR    | rs1260326-T  | 0.04672  | 0.02588  | 0.06756  | 0.28226  | 0.15633  | 0.40819  | 1.34E-05 | 19273 | 0.363 |
|          | GCKR    | rs780094-T   | 0.04330  | 0.02256  | 0.06404  | 0.26160  | 0.13631  | 0.38688  | 5.00E-05 | 19273 | 0.370 |
|          | LYPLAL1 | rs12137855-C | 0.01046  | -0.01226 | 0.03317  | 0.05485  | -0.06429 | 0.17399  | 0.37090  | 19268 | 0.732 |
|          | PNPLA3  | rs738409-G   | 0.00729  | -0.01676 | 0.03133  | 0.00620  | -0.01425 | 0.02665  | 0.55590  | 19268 | 0.231 |
|          | TM6SF2  | rs58542926-T | -0.05605 | -0.09730 | -0.01479 | -0.08732 | -0.15160 | -0.02305 | 0.00830  | 19268 | 0.063 |
| S.HDL.L  | NCAN    | rs2228603-T  | -0.03798 | -0.07835 | 0.00238  | -0.05918 | -0.12206 | 0.00371  | 0.06742  | 19273 | 0.068 |
|          | GCKR    | rs1260326-T  | 0.07852  | 0.05773  | 0.09931  | 0.47439  | 0.34876  | 0.60002  | 1.91E-13 | 19273 | 0.363 |
|          | GCKR    | rs780094-T   | 0.06849  | 0.04779  | 0.08918  | 0.41379  | 0.28876  | 0.53882  | 1.15E-10 | 19273 | 0.370 |
|          | LYPLAL1 | rs12137855-C | 0.01689  | -0.00583 | 0.03962  | 0.08863  | -0.03057 | 0.20782  | 0.14722  | 19268 | 0.732 |
|          | PNPLA3  | rs738409-G   | -0.00522 | -0.02926 | 0.01883  | -0.00444 | -0.02489 | 0.01602  | 0.67248  | 19268 | 0.231 |

|               |           |             |              |              |          |          |          |          |          |          |          |       |       |
|---------------|-----------|-------------|--------------|--------------|----------|----------|----------|----------|----------|----------|----------|-------|-------|
|               |           | TM6SF2      | rs58542926-T | -0.06161     | -0.10287 | -0.02035 | -0.09598 | -0.16026 | -0.03171 | 0.00362  | 19268    | 0.063 |       |
|               |           | NCAN        | rs2228603-T  | -0.04092     | -0.08124 | -0.00060 | -0.06376 | -0.12657 | -0.00094 | 0.04791  | 19273    | 0.068 |       |
| Phospholipids | PC        | GCKR        | rs1260326-T  | 0.06691      | 0.04213  | 0.09170  | 0.40427  | 0.25453  | 0.55401  | 1.49E-07 | 13542    | 0.364 |       |
|               |           | GCKR        | rs780094-T   | 0.06435      | 0.03973  | 0.08897  | 0.38879  | 0.24005  | 0.53752  | 3.64E-07 | 13542    | 0.371 |       |
|               |           | LYPLAL1     | rs12137855-C | 0.01460      | -0.01266 | 0.04187  | 0.07661  | -0.06641 | 0.21962  | 0.29685  | 13539    | 0.735 |       |
|               |           | PNPLA3      | rs738409-G   | 0.03188      | 0.00324  | 0.06053  | 0.02712  | 0.00275  | 0.05149  | 0.03022  | 13538    | 0.232 |       |
|               |           | TM6SF2      | rs58542926-T | -0.12209     | -0.17116 | -0.07301 | -0.19021 | -0.26667 | -0.11375 | 1.29E-06 | 13538    | 0.063 |       |
|               |           | NCAN        | rs2228603-T  | -0.10101     | -0.14887 | -0.05315 | -0.15737 | -0.23194 | -0.08280 | 4.00E-05 | 13542    | 0.068 |       |
|               |           | SM          | GCKR         | rs1260326-T  | 0.03150  | 0.00665  | 0.05634  | 0.19029  | 0.04020  | 0.34039  | 0.01329  | 13476 | 0.364 |
|               |           |             | GCKR         | rs780094-T   | 0.02878  | 0.00410  | 0.05346  | 0.17388  | 0.02479  | 0.32297  | 0.02275  | 13476 | 0.370 |
|               |           |             | LYPLAL1      | rs12137855-C | 0.00748  | -0.01984 | 0.03479  | 0.03922  | -0.10406 | 0.18251  | 0.59288  | 13475 | 0.733 |
|               |           |             | PNPLA3       | rs738409-G   | 0.03456  | 0.00584  | 0.06327  | 0.02940  | 0.00497  | 0.05382  | 0.01876  | 13470 | 0.233 |
|               |           |             | TM6SF2       | rs58542926-T | -0.09909 | -0.14827 | -0.04991 | -0.15438 | -0.23100 | -0.07775 | 8.38E-05 | 13472 | 0.063 |
|               |           |             | NCAN         | rs2228603-T  | -0.09821 | -0.14616 | -0.05025 | -0.15300 | -0.22772 | -0.07829 | 6.40E-05 | 13476 | 0.067 |
|               |           | TotPG       | GCKR         | rs1260326-T  | 0.07379  | 0.04900  | 0.09859  | 0.44583  | 0.29602  | 0.59564  | 6.83E-09 | 13519 | 0.363 |
|               |           |             | GCKR         | rs780094-T   | 0.07093  | 0.04630  | 0.09556  | 0.42852  | 0.27972  | 0.57733  | 2.05E-08 | 13519 | 0.370 |
|               |           |             | LYPLAL1      | rs12137855-C | 0.02572  | -0.00157 | 0.05301  | 0.13493  | -0.00825 | 0.27811  | 0.06631  | 13518 | 0.734 |
|               |           |             | PNPLA3       | rs738409-G   | 0.02818  | -0.00049 | 0.05684  | 0.02397  | -0.00042 | 0.04835  | 0.05545  | 13517 | 0.234 |
|               |           |             | TM6SF2       | rs58542926-T | -0.12487 | -0.17398 | -0.07577 | -0.19455 | -0.27106 | -0.11804 | 7.35E-07 | 13515 | 0.063 |
|               |           |             | NCAN         | rs2228603-T  | -0.09998 | -0.14785 | -0.05210 | -0.15576 | -0.23035 | -0.08118 | 4.76E-05 | 13519 | 0.068 |
|               |           | XXL.VLDL.PL | GCKR         | rs1260326-T  | 0.08249  | 0.06244  | 0.10254  | 0.49839  | 0.37727  | 0.61950  | 1.09E-15 | 21542 | 0.361 |
|               |           |             | GCKR         | rs780094-T   | 0.07875  | 0.05882  | 0.09867  | 0.47576  | 0.35539  | 0.59613  | 1.36E-14 | 21542 | 0.367 |
|               |           |             | LYPLAL1      | rs12137855-C | 0.01762  | -0.00437 | 0.03960  | 0.09241  | -0.02291 | 0.20774  | 0.11821  | 21537 | 0.742 |
|               |           |             | PNPLA3       | rs738409-G   | 0.00468  | -0.01852 | 0.02788  | 0.00398  | -0.01575 | 0.02372  | 0.69401  | 21537 | 0.230 |
|               |           |             | TM6SF2       | rs58542926-T | -0.10864 | -0.14901 | -0.06827 | -0.16926 | -0.23215 | -0.10637 | 1.58E-07 | 21537 | 0.063 |
|               |           |             | NCAN         | rs2228603-T  | -0.09762 | -0.13736 | -0.05788 | -0.15208 | -0.21400 | -0.09017 | 1.70E-06 | 21542 | 0.067 |
|               |           | XL.VLDL.PL  | GCKR         | rs1260326-T  | 0.09048  | 0.07032  | 0.11063  | 0.54663  | 0.42488  | 0.66838  | 2.86E-18 | 21237 | 0.361 |
|               |           |             | GCKR         | rs780094-T   | 0.08696  | 0.06693  | 0.10699  | 0.52539  | 0.40439  | 0.64639  | 3.46E-17 | 21237 | 0.366 |
|               |           |             | LYPLAL1      | rs12137855-C | 0.02628  | 0.00417  | 0.04839  | 0.13788  | 0.02188  | 0.25387  | 0.02095  | 21232 | 0.742 |
|               |           |             | PNPLA3       | rs738409-G   | 0.01144  | -0.01187 | 0.03476  | 0.00973  | -0.01010 | 0.02957  | 0.34031  | 21232 | 0.230 |
|               |           |             | TM6SF2       | rs58542926-T | -0.13157 | -0.17213 | -0.09101 | -0.20498 | -0.26817 | -0.14179 | 3.03E-10 | 21232 | 0.063 |
|               |           |             | NCAN         | rs2228603-T  | -0.11597 | -0.15591 | -0.07604 | -0.18069 | -0.24291 | -0.11846 | 1.73E-08 | 21237 | 0.067 |
|               | L.VLDL.PL | GCKR        | rs1260326-T  | 0.09682      | 0.07667  | 0.11696  | 0.58493  | 0.46323  | 0.70663  | 9.13E-21 | 21239    | 0.361 |       |
|               |           | GCKR        | rs780094-T   | 0.09412      | 0.07410  | 0.11414  | 0.56865  | 0.44770  | 0.68960  | 6.15E-20 | 21239    | 0.366 |       |
|               |           | LYPLAL1     | rs12137855-C | 0.03096      | 0.00884  | 0.05308  | 0.16242  | 0.04637  | 0.27846  | 0.00648  | 21234    | 0.742 |       |
|               |           | PNPLA3      | rs738409-G   | 0.01767      | -0.00564 | 0.04097  | 0.01503  | -0.00480 | 0.03485  | 0.14022  | 21234    | 0.230 |       |
|               |           | TM6SF2      | rs58542926-T | -0.13940     | -0.17993 | -0.09887 | -0.21718 | -0.28033 | -0.15404 | 2.27E-11 | 21234    | 0.063 |       |
|               |           | NCAN        | rs2228603-T  | -0.11974     | -0.15968 | -0.07980 | -0.18655 | -0.24877 | -0.12433 | 5.56E-09 | 21239    | 0.067 |       |
|               | M.VLDL.PL | GCKR        | rs1260326-T  | 0.09786      | 0.07770  | 0.11802  | 0.59125  | 0.46945  | 0.71304  | 4.48E-21 | 21240    | 0.361 |       |
|               |           | GCKR        | rs780094-T   | 0.09311      | 0.07307  | 0.11314  | 0.56254  | 0.44149  | 0.68358  | 1.92E-19 | 21240    | 0.366 |       |
|               |           | LYPLAL1     | rs12137855-C | 0.03070      | 0.00856  | 0.05285  | 0.16107  | 0.04489  | 0.27726  | 0.00712  | 21235    | 0.742 |       |

|            |         |              |          |          |          |          |          |          |          |       |       |
|------------|---------|--------------|----------|----------|----------|----------|----------|----------|----------|-------|-------|
|            | PNPLA3  | rs738409-G   | 0.02122  | -0.00212 | 0.04456  | 0.01805  | -0.00180 | 0.03790  | 0.07744  | 21235 | 0.230 |
|            | TM6SF2  | rs58542926-T | -0.15482 | -0.19538 | -0.11425 | -0.24120 | -0.30441 | -0.17800 | 1.31E-13 | 21235 | 0.063 |
|            | NCAN    | rs2228603-T  | -0.13719 | -0.17714 | -0.09723 | -0.21373 | -0.27599 | -0.15148 | 2.70E-11 | 21240 | 0.067 |
| S.VLDL.PL  | GCKR    | rs1260326-T  | 0.09232  | 0.07234  | 0.11231  | 0.55779  | 0.43704  | 0.67854  | 3.94E-19 | 21551 | 0.361 |
|            | GCKR    | rs780094-T   | 0.08714  | 0.06727  | 0.10700  | 0.52646  | 0.40645  | 0.64646  | 2.09E-17 | 21551 | 0.367 |
|            | LYPLAL1 | rs12137855-C | 0.01863  | -0.00333 | 0.04058  | 0.09771  | -0.01748 | 0.21290  | 0.10047  | 21546 | 0.742 |
|            | PNPLA3  | rs738409-G   | 0.02285  | -0.00031 | 0.04602  | 0.01944  | -0.00027 | 0.03915  | 0.05611  | 21546 | 0.230 |
|            | TM6SF2  | rs58542926-T | -0.14915 | -0.18944 | -0.10887 | -0.23238 | -0.29514 | -0.16962 | 7.82E-13 | 21546 | 0.063 |
|            | NCAN    | rs2228603-T  | -0.13654 | -0.17614 | -0.09693 | -0.21272 | -0.27443 | -0.15102 | 2.55E-11 | 21551 | 0.067 |
| XS.VLDL.PL | GCKR    | rs1260326-T  | 0.03507  | 0.01416  | 0.05598  | 0.21187  | 0.08553  | 0.33821  | 0.00119  | 19273 | 0.363 |
|            | GCKR    | rs780094-T   | 0.03310  | 0.01230  | 0.05391  | 0.20000  | 0.07430  | 0.32570  | 0.00210  | 19273 | 0.370 |
|            | LYPLAL1 | rs12137855-C | 0.00950  | -0.01328 | 0.03228  | 0.04984  | -0.06965 | 0.16933  | 0.41983  | 19268 | 0.732 |
|            | PNPLA3  | rs738409-G   | 0.02371  | -0.00040 | 0.04782  | 0.02017  | -0.00034 | 0.04068  | 0.05718  | 19268 | 0.231 |
|            | TM6SF2  | rs58542926-T | -0.12645 | -0.16778 | -0.08513 | -0.19701 | -0.26140 | -0.13262 | 3.36E-09 | 19268 | 0.063 |
|            | NCAN    | rs2228603-T  | -0.11319 | -0.15366 | -0.07272 | -0.17635 | -0.23939 | -0.11330 | 6.45E-08 | 19273 | 0.068 |
| IDL.PL     | GCKR    | rs1260326-T  | 0.03830  | 0.01825  | 0.05835  | 0.23141  | 0.11028  | 0.35254  | 0.00022  | 21559 | 0.361 |
|            | GCKR    | rs780094-T   | 0.03584  | 0.01591  | 0.05576  | 0.21651  | 0.09615  | 0.33687  | 0.00050  | 21559 | 0.367 |
|            | LYPLAL1 | rs12137855-C | 0.01206  | -0.00991 | 0.03403  | 0.06328  | -0.05198 | 0.17853  | 0.28779  | 21554 | 0.742 |
|            | PNPLA3  | rs738409-G   | 0.01855  | -0.00464 | 0.04174  | 0.01578  | -0.00395 | 0.03550  | 0.12147  | 21554 | 0.230 |
|            | TM6SF2  | rs58542926-T | -0.10980 | -0.15014 | -0.06945 | -0.17106 | -0.23392 | -0.10820 | 1.40E-07 | 21554 | 0.063 |
|            | NCAN    | rs2228603-T  | -0.09804 | -0.13773 | -0.05836 | -0.15275 | -0.21457 | -0.09092 | 1.75E-06 | 21559 | 0.067 |
| L.LDL.PL   | GCKR    | rs1260326-T  | 0.03781  | 0.01779  | 0.05783  | 0.22844  | 0.10749  | 0.34939  | 0.00026  | 21550 | 0.361 |
|            | GCKR    | rs780094-T   | 0.03267  | 0.01277  | 0.05256  | 0.19737  | 0.07718  | 0.31757  | 0.00150  | 21550 | 0.367 |
|            | LYPLAL1 | rs12137855-C | 0.01205  | -0.00991 | 0.03400  | 0.06319  | -0.05196 | 0.17834  | 0.28858  | 21545 | 0.742 |
|            | PNPLA3  | rs738409-G   | 0.01233  | -0.01084 | 0.03549  | 0.01049  | -0.00922 | 0.03019  | 0.30339  | 21545 | 0.230 |
|            | TM6SF2  | rs58542926-T | -0.10079 | -0.14112 | -0.06047 | -0.15703 | -0.21986 | -0.09421 | 1.36E-06 | 21545 | 0.063 |
|            | NCAN    | rs2228603-T  | -0.08535 | -0.12501 | -0.04569 | -0.13297 | -0.19476 | -0.07118 | 3.20E-05 | 21550 | 0.067 |
| M.LDL.PL   | GCKR    | rs1260326-T  | 0.05571  | 0.03572  | 0.07570  | 0.33660  | 0.21582  | 0.45737  | 7.78E-08 | 21558 | 0.361 |
|            | GCKR    | rs780094-T   | 0.04854  | 0.02868  | 0.06841  | 0.29329  | 0.17326  | 0.41331  | 2.47E-06 | 21558 | 0.367 |
|            | LYPLAL1 | rs12137855-C | 0.01740  | -0.00453 | 0.03933  | 0.09126  | -0.02378 | 0.20630  | 0.12593  | 21553 | 0.742 |
|            | PNPLA3  | rs738409-G   | 0.00188  | -0.02126 | 0.02501  | 0.00159  | -0.01809 | 0.02128  | 0.87572  | 21553 | 0.230 |
|            | TM6SF2  | rs58542926-T | -0.10310 | -0.14338 | -0.06281 | -0.16062 | -0.22338 | -0.09786 | 8.07E-07 | 21553 | 0.063 |
|            | NCAN    | rs2228603-T  | -0.08579 | -0.12543 | -0.04615 | -0.13365 | -0.19541 | -0.07190 | 3.01E-05 | 21558 | 0.067 |
| XL.HDL.PL  | GCKR    | rs1260326-T  | -0.03328 | -0.05416 | -0.01241 | -0.20108 | -0.32720 | -0.07497 | 0.00192  | 19273 | 0.363 |
|            | GCKR    | rs780094-T   | -0.02575 | -0.04652 | -0.00498 | -0.15559 | -0.28108 | -0.03010 | 0.01583  | 19273 | 0.370 |
|            | LYPLAL1 | rs12137855-C | -0.00795 | -0.03071 | 0.01482  | -0.04168 | -0.16111 | 0.07774  | 0.49691  | 19268 | 0.732 |
|            | PNPLA3  | rs738409-G   | -0.01167 | -0.03575 | 0.01242  | -0.00992 | -0.03041 | 0.01056  | 0.34573  | 19268 | 0.231 |
|            | TM6SF2  | rs58542926-T | 0.03918  | -0.00213 | 0.08050  | 0.06105  | -0.00332 | 0.12541  | 0.06491  | 19268 | 0.063 |
|            | NCAN    | rs2228603-T  | 0.04410  | 0.00367  | 0.08452  | 0.06870  | 0.00572  | 0.13169  | 0.03377  | 19273 | 0.068 |
| L.HDL.PL   | GCKR    | rs1260326-T  | -0.02781 | -0.04869 | -0.00694 | -0.16803 | -0.29414 | -0.04191 | 0.00998  | 19273 | 0.363 |
|            | GCKR    | rs780094-T   | -0.02304 | -0.04381 | -0.00227 | -0.13919 | -0.26468 | -0.01370 | 0.03192  | 19273 | 0.370 |

|             |          |         |              |          |          |          |          |          |          |          |       |       |
|-------------|----------|---------|--------------|----------|----------|----------|----------|----------|----------|----------|-------|-------|
|             |          | LYPLAL1 | rs12137855-C | -0.00575 | -0.02849 | 0.01698  | -0.03018 | -0.14944 | 0.08908  | 0.62452  | 19268 | 0.732 |
|             |          | PNPLA3  | rs738409-G   | 0.00271  | -0.02136 | 0.02678  | 0.00231  | -0.01817 | 0.02278  | 0.82749  | 19268 | 0.231 |
|             |          | TM6SF2  | rs58542926-T | 0.02084  | -0.02045 | 0.06212  | 0.03246  | -0.03186 | 0.09679  | 0.32895  | 19268 | 0.063 |
|             |          | NCAN    | rs2228603-T  | 0.02841  | -0.01198 | 0.06880  | 0.04427  | -0.01866 | 0.10720  | 0.17357  | 19273 | 0.068 |
|             | M.HDL.PL | GCKR    | rs1260326-T  | 0.04953  | 0.02951  | 0.06954  | 0.29924  | 0.17831  | 0.42017  | 1.55E-06 | 21558 | 0.361 |
|             |          | GCKR    | rs780094-T   | 0.04617  | 0.02628  | 0.06607  | 0.27897  | 0.15879  | 0.39916  | 6.54E-06 | 21558 | 0.367 |
|             |          | LYPLAL1 | rs12137855-C | 0.01354  | -0.00840 | 0.03548  | 0.07103  | -0.04405 | 0.18611  | 0.23029  | 21553 | 0.742 |
|             |          | PNPLA3  | rs738409-G   | 0.00670  | -0.01645 | 0.02984  | 0.00570  | -0.01399 | 0.02539  | 0.57391  | 21553 | 0.230 |
|             |          | TM6SF2  | rs58542926-T | -0.07347 | -0.11377 | -0.03318 | -0.11447 | -0.17725 | -0.05169 | 0.00040  | 21553 | 0.063 |
|             |          | NCAN    | rs2228603-T  | -0.05098 | -0.09061 | -0.01135 | -0.07942 | -0.14116 | -0.01768 | 0.01245  | 21558 | 0.067 |
| Cholesterol | L.VLDL.C | GCKR    | rs1260326-T  | 0.08912  | 0.06896  | 0.10929  | 0.53846  | 0.41664  | 0.66028  | 8.49E-18 | 21235 | 0.361 |
|             |          | GCKR    | rs780094-T   | 0.08552  | 0.06548  | 0.10556  | 0.51670  | 0.39564  | 0.63776  | 1.07E-16 | 21235 | 0.366 |
|             |          | LYPLAL1 | rs12137855-C | 0.02834  | 0.00385  | 0.05282  | 0.14866  | 0.02022  | 0.27709  | 0.02437  | 17570 | 0.745 |
|             |          | PNPLA3  | rs738409-G   | 0.01425  | -0.00906 | 0.03757  | 0.01212  | -0.00771 | 0.03195  | 0.23429  | 21230 | 0.230 |
|             |          | TM6SF2  | rs58542926-T | -0.14257 | -0.18312 | -0.10203 | -0.22213 | -0.28529 | -0.15896 | 8.15E-12 | 21230 | 0.063 |
|             |          | NCAN    | rs2228603-T  | -0.12439 | -0.16435 | -0.08443 | -0.19380 | -0.25605 | -0.13154 | 1.44E-09 | 21235 | 0.067 |
|             | M.VLDL.C | GCKR    | rs1260326-T  | 0.09445  | 0.07445  | 0.11445  | 0.57063  | 0.44981  | 0.69146  | 5.02E-20 | 21551 | 0.361 |
|             |          | GCKR    | rs780094-T   | 0.08919  | 0.06932  | 0.10907  | 0.53887  | 0.41878  | 0.65895  | 3.13E-18 | 21551 | 0.367 |
|             |          | LYPLAL1 | rs12137855-C | 0.02567  | 0.00370  | 0.04764  | 0.13467  | 0.01943  | 0.24991  | 0.02329  | 21546 | 0.742 |
|             |          | PNPLA3  | rs738409-G   | 0.01967  | -0.00350 | 0.04285  | 0.01673  | -0.00298 | 0.03645  | 0.09931  | 21546 | 0.230 |
|             |          | TM6SF2  | rs58542926-T | -0.16681 | -0.20708 | -0.12653 | -0.25988 | -0.32263 | -0.19713 | 9.32E-16 | 21546 | 0.063 |
|             |          | NCAN    | rs2228603-T  | -0.15170 | -0.19131 | -0.11210 | -0.23635 | -0.29806 | -0.17465 | 1.07E-13 | 21551 | 0.067 |
|             | S.VLDL.C | GCKR    | rs1260326-T  | 0.07396  | 0.05398  | 0.09394  | 0.44683  | 0.32611  | 0.56754  | 7.58E-13 | 21557 | 0.361 |
|             |          | GCKR    | rs780094-T   | 0.06843  | 0.04857  | 0.08829  | 0.41344  | 0.29347  | 0.53341  | 2.49E-11 | 21557 | 0.367 |
|             |          | LYPLAL1 | rs12137855-C | 0.01849  | -0.00347 | 0.04044  | 0.09698  | -0.01821 | 0.21217  | 0.10273  | 21552 | 0.742 |
|             |          | PNPLA3  | rs738409-G   | 0.01683  | -0.00634 | 0.04000  | 0.01432  | -0.00539 | 0.03403  | 0.15912  | 21552 | 0.230 |
|             |          | TM6SF2  | rs58542926-T | -0.13869 | -0.17899 | -0.09839 | -0.21608 | -0.27886 | -0.15330 | 2.64E-11 | 21552 | 0.063 |
|             |          | NCAN    | rs2228603-T  | -0.12729 | -0.16688 | -0.08770 | -0.19832 | -0.26000 | -0.13664 | 4.75E-10 | 21557 | 0.067 |
|             | IDL.C    | GCKR    | rs1260326-T  | 0.03248  | 0.01160  | 0.05336  | 0.19622  | 0.07006  | 0.32238  | 0.00266  | 19273 | 0.363 |
|             |          | GCKR    | rs780094-T   | 0.02917  | 0.00839  | 0.04994  | 0.17621  | 0.05068  | 0.30173  | 0.00669  | 19273 | 0.370 |
|             |          | LYPLAL1 | rs12137855-C | 0.00493  | -0.01783 | 0.02768  | 0.02584  | -0.09353 | 0.14522  | 0.67574  | 19268 | 0.732 |
|             |          | PNPLA3  | rs738409-G   | 0.01350  | -0.01058 | 0.03759  | 0.01149  | -0.00900 | 0.03198  | 0.27859  | 19268 | 0.231 |
|             |          | TM6SF2  | rs58542926-T | -0.10363 | -0.14493 | -0.06233 | -0.16145 | -0.22580 | -0.09711 | 1.26E-06 | 19268 | 0.063 |
|             |          | NCAN    | rs2228603-T  | -0.09302 | -0.13343 | -0.05261 | -0.14492 | -0.20788 | -0.08196 | 8.79E-06 | 19273 | 0.068 |
|             | LDL.C    | GCKR    | rs1260326-T  | 0.04214  | 0.02217  | 0.06212  | 0.25461  | 0.13392  | 0.37530  | 4.76E-05 | 21559 | 0.361 |
|             |          | GCKR    | rs780094-T   | 0.03580  | 0.01595  | 0.05565  | 0.21628  | 0.09634  | 0.33621  | 0.00051  | 21559 | 0.367 |
|             |          | LYPLAL1 | rs12137855-C | 0.01526  | -0.00665 | 0.03718  | 0.08008  | -0.03488 | 0.19503  | 0.17902  | 21554 | 0.742 |
|             |          | PNPLA3  | rs738409-G   | 0.00470  | -0.01842 | 0.02782  | 0.00400  | -0.01567 | 0.02367  | 0.69490  | 21554 | 0.230 |
|             |          | TM6SF2  | rs58542926-T | -0.08833 | -0.12859 | -0.04807 | -0.13761 | -0.20033 | -0.07489 | 2.34E-05 | 21554 | 0.063 |
|             |          | NCAN    | rs2228603-T  | -0.07590 | -0.11549 | -0.03631 | -0.11825 | -0.17994 | -0.05657 | 0.00022  | 21559 | 0.067 |
|             | L.LDL.C  | GCKR    | rs1260326-T  | 0.03341  | 0.01340  | 0.05341  | 0.20183  | 0.08098  | 0.32267  | 0.00126  | 21552 | 0.361 |

|          |         |              |          |          |          |          |          |          |          |       |       |
|----------|---------|--------------|----------|----------|----------|----------|----------|----------|----------|-------|-------|
|          | GCKR    | rs780094-T   | 0.02797  | 0.00810  | 0.04785  | 0.16901  | 0.04894  | 0.28909  | 0.00657  | 21552 | 0.367 |
|          | LYPLAL1 | rs12137855-C | 0.01163  | -0.01031 | 0.03356  | 0.06100  | -0.05407 | 0.17606  | 0.30586  | 21547 | 0.742 |
|          | PNPLA3  | rs738409-G   | 0.00913  | -0.01402 | 0.03228  | 0.00777  | -0.01192 | 0.02746  | 0.44605  | 21547 | 0.230 |
|          | TM6SF2  | rs58542926-T | -0.08807 | -0.12836 | -0.04777 | -0.13721 | -0.19999 | -0.07443 | 2.45E-05 | 21547 | 0.063 |
|          | NCAN    | rs2228603-T  | -0.07437 | -0.11399 | -0.03475 | -0.11586 | -0.17759 | -0.05414 | 0.00029  | 21552 | 0.067 |
| M.LDL.C  | GCKR    | rs1260326-T  | 0.04123  | 0.02125  | 0.06122  | 0.24913  | 0.12840  | 0.36985  | 6.92E-05 | 21559 | 0.361 |
|          | GCKR    | rs780094-T   | 0.03433  | 0.01448  | 0.05419  | 0.20743  | 0.08746  | 0.32740  | 0.00086  | 21559 | 0.367 |
|          | LYPLAL1 | rs12137855-C | 0.01469  | -0.00723 | 0.03661  | 0.07707  | -0.03793 | 0.19207  | 0.19598  | 21554 | 0.742 |
|          | PNPLA3  | rs738409-G   | 0.00325  | -0.01988 | 0.02639  | 0.00277  | -0.01691 | 0.02244  | 0.78616  | 21554 | 0.230 |
|          | TM6SF2  | rs58542926-T | -0.08395 | -0.12423 | -0.04368 | -0.13080 | -0.19355 | -0.06805 | 5.84E-05 | 21554 | 0.063 |
|          | NCAN    | rs2228603-T  | -0.06960 | -0.10920 | -0.03000 | -0.10844 | -0.17013 | -0.04674 | 0.00070  | 21559 | 0.067 |
| S.LDL.C  | GCKR    | rs1260326-T  | 0.06066  | 0.04069  | 0.08063  | 0.36651  | 0.24585  | 0.48716  | 4.29E-09 | 21556 | 0.361 |
|          | GCKR    | rs780094-T   | 0.05349  | 0.03364  | 0.07333  | 0.32316  | 0.20326  | 0.44306  | 1.88E-07 | 21556 | 0.367 |
|          | LYPLAL1 | rs12137855-C | 0.01345  | -0.00846 | 0.03536  | 0.07054  | -0.04440 | 0.18549  | 0.23505  | 21551 | 0.742 |
|          | PNPLA3  | rs738409-G   | 0.00432  | -0.01880 | 0.02744  | 0.00367  | -0.01600 | 0.02334  | 0.71799  | 21551 | 0.230 |
|          | TM6SF2  | rs58542926-T | -0.10334 | -0.14361 | -0.06308 | -0.16101 | -0.22373 | -0.09828 | 6.96E-07 | 21551 | 0.063 |
|          | NCAN    | rs2228603-T  | -0.09070 | -0.13029 | -0.05111 | -0.14131 | -0.20299 | -0.07963 | 9.42E-06 | 21556 | 0.067 |
| HDL.C    | GCKR    | rs1260326-T  | -0.00225 | -0.02229 | 0.01778  | -0.01361 | -0.13464 | 0.10743  | 0.82712  | 21555 | 0.361 |
|          | GCKR    | rs780094-T   | -0.00182 | -0.02173 | 0.01809  | -0.01099 | -0.13127 | 0.10929  | 0.85910  | 21555 | 0.367 |
|          | LYPLAL1 | rs12137855-C | -0.00099 | -0.02294 | 0.02097  | -0.00517 | -0.12036 | 0.11002  | 0.93047  | 21550 | 0.742 |
|          | PNPLA3  | rs738409-G   | -0.01129 | -0.03446 | 0.01188  | -0.00960 | -0.02931 | 0.01010  | 0.34390  | 21550 | 0.230 |
|          | TM6SF2  | rs58542926-T | 0.00593  | -0.03440 | 0.04625  | 0.00923  | -0.05360 | 0.07206  | 0.77537  | 21550 | 0.063 |
|          | NCAN    | rs2228603-T  | 0.01951  | -0.02012 | 0.05914  | 0.03039  | -0.03135 | 0.09213  | 0.33904  | 21555 | 0.067 |
| XL.HDL.C | GCKR    | rs1260326-T  | -0.00869 | -0.02871 | 0.01132  | -0.05252 | -0.17343 | 0.06838  | 0.39526  | 21540 | 0.361 |
|          | GCKR    | rs780094-T   | -0.00566 | -0.02555 | 0.01422  | -0.03422 | -0.15437 | 0.08593  | 0.57728  | 21540 | 0.367 |
|          | LYPLAL1 | rs12137855-C | -0.00259 | -0.02455 | 0.01938  | -0.01357 | -0.12879 | 0.10166  | 0.81778  | 21535 | 0.742 |
|          | PNPLA3  | rs738409-G   | -0.02251 | -0.04567 | 0.00065  | -0.01915 | -0.03885 | 0.00055  | 0.05718  | 21535 | 0.230 |
|          | TM6SF2  | rs58542926-T | -0.00672 | -0.04706 | 0.03361  | -0.01047 | -0.07331 | 0.05237  | 0.74432  | 21535 | 0.063 |
|          | NCAN    | rs2228603-T  | 0.00136  | -0.03827 | 0.04100  | 0.00213  | -0.05962 | 0.06387  | 0.94630  | 21540 | 0.067 |
| L.HDL.C  | GCKR    | rs1260326-T  | -0.03075 | -0.05079 | -0.01071 | -0.18575 | -0.30684 | -0.06467 | 0.00291  | 21558 | 0.361 |
|          | GCKR    | rs780094-T   | -0.02650 | -0.04641 | -0.00658 | -0.16008 | -0.28041 | -0.03976 | 0.00983  | 21558 | 0.367 |
|          | LYPLAL1 | rs12137855-C | -0.00745 | -0.02943 | 0.01453  | -0.03908 | -0.15438 | 0.07623  | 0.51066  | 21553 | 0.742 |
|          | PNPLA3  | rs738409-G   | -0.00619 | -0.02937 | 0.01699  | -0.00527 | -0.02498 | 0.01445  | 0.60409  | 21553 | 0.230 |
|          | TM6SF2  | rs58542926-T | 0.03726  | -0.00309 | 0.07760  | 0.05805  | -0.00481 | 0.12091  | 0.07307  | 21553 | 0.063 |
|          | NCAN    | rs2228603-T  | 0.04286  | 0.00318  | 0.08254  | 0.06678  | 0.00496  | 0.12860  | 0.03603  | 21558 | 0.067 |
| M.HDL.C  | GCKR    | rs1260326-T  | 0.03059  | 0.01029  | 0.05088  | 0.18481  | 0.06219  | 0.30742  | 0.00343  | 21557 | 0.351 |
|          | GCKR    | rs780094-T   | 0.02792  | 0.00775  | 0.04808  | 0.16867  | 0.04684  | 0.29050  | 0.00718  | 20984 | 0.366 |
|          | LYPLAL1 | rs12137855-C | 0.00970  | -0.01223 | 0.03162  | 0.05086  | -0.06418 | 0.16590  | 0.39050  | 21553 | 0.742 |
|          | PNPLA3  | rs738409-G   | 0.00175  | -0.02139 | 0.02488  | 0.00149  | -0.01819 | 0.02117  | 0.88339  | 21553 | 0.230 |
|          | TM6SF2  | rs58542926-T | -0.02726 | -0.06755 | 0.01303  | -0.04247 | -0.10524 | 0.02030  | 0.18885  | 21553 | 0.063 |
|          | NCAN    | rs2228603-T  | -0.01384 | -0.05345 | 0.02577  | -0.02156 | -0.08328 | 0.04015  | 0.49739  | 21558 | 0.067 |



|                  |              |             |              |              |          |          |          |          |          |          |         |       |       |
|------------------|--------------|-------------|--------------|--------------|----------|----------|----------|----------|----------|----------|---------|-------|-------|
|                  | Est.C        | GCKR        | rs1260326-T  | 0.06465      | 0.03979  | 0.08952  | 0.39061  | 0.24039  | 0.54082  | 4.40E-07 | 13497   | 0.363 |       |
|                  |              | GCKR        | rs780094-T   | 0.05724      | 0.03254  | 0.08195  | 0.34585  | 0.19661  | 0.49509  | 6.75E-06 | 13497   | 0.370 |       |
|                  |              | LYPLAL1     | rs12137855-C | 0.01492      | -0.01243 | 0.04226  | 0.07824  | -0.06520 | 0.22169  | 0.28903  | 13496   | 0.733 |       |
|                  |              | PNPLA3      | rs738409-G   | 0.02270      | -0.00606 | 0.05145  | 0.01931  | -0.00515 | 0.04377  | 0.12493  | 13493   | 0.233 |       |
|                  |              | TM6SF2      | rs58542926-T | -0.13851     | -0.18775 | -0.08927 | -0.21580 | -0.29251 | -0.13908 | 4.66E-08 | 13493   | 0.063 |       |
|                  | Serum.C      | NCAN        | rs2228603-T  | -0.12749     | -0.17547 | -0.07950 | -0.19862 | -0.27338 | -0.12386 | 2.46E-07 | 13497   | 0.067 |       |
|                  |              | GCKR        | rs1260326-T  | 0.06805      | 0.04801  | 0.08808  | 0.41112  | 0.29006  | 0.53218  | 4.44E-11 | 21491   | 0.361 |       |
|                  |              | GCKR        | rs780094-T   | 0.06406      | 0.04415  | 0.08397  | 0.38704  | 0.26674  | 0.50734  | 4.34E-10 | 21491   | 0.367 |       |
|                  |              | LYPLAL1     | rs12137855-C | 0.01272      | -0.00925 | 0.03469  | 0.06673  | -0.04852 | 0.18199  | 0.26093  | 21486   | 0.742 |       |
|                  |              | PNPLA3      | rs738409-G   | 0.00547      | -0.01772 | 0.02866  | 0.00466  | -0.01507 | 0.02438  | 0.64679  | 21486   | 0.230 |       |
|                  |              | TM6SF2      | rs58542926-T | -0.12206     | -0.16240 | -0.08173 | -0.19017 | -0.25301 | -0.12733 | 4.33E-09 | 21486   | 0.063 |       |
|                  |              | NCAN        | rs2228603-T  | -0.10300     | -0.14265 | -0.06335 | -0.16047 | -0.22224 | -0.09869 | 4.66E-07 | 21491   | 0.067 |       |
|                  |              | Free.C      | GCKR         | rs1260326-T  | 0.03268  | 0.00785  | 0.05752  | 0.19746  | 0.04743  | 0.34750  | 0.01046 | 13497 | 0.363 |
|                  |              |             | GCKR         | rs780094-T   | 0.02764  | 0.00297  | 0.05231  | 0.16701  | 0.01797  | 0.31605  | 0.02924 | 13497 | 0.370 |
|                  |              |             | LYPLAL1      | rs12137855-C | 0.00922  | -0.01806 | 0.03650  | 0.04836  | -0.09475 | 0.19147  | 0.51085 | 13496 | 0.733 |
| PNPLA3           | rs738409-G   |             | 0.00568      | -0.02302     | 0.03437  | 0.00483  | -0.01958 | 0.02924  | 0.70021  | 13493    | 0.233   |       |       |
| TM6SF2           | rs58542926-T |             | -0.13164     | -0.18078     | -0.08250 | -0.20509 | -0.28166 | -0.12853 | 1.90E-07 | 13493    | 0.063   |       |       |
|                  | NCAN         | rs2228603-T | -0.11805     | -0.16595     | -0.07014 | -0.18391 | -0.25855 | -0.10928 | 1.65E-06 | 13497    | 0.067   |       |       |
| Free cholesterol | L.VLDL.FC    | GCKR        | rs1260326-T  | 0.09459      | 0.07445  | 0.11473  | 0.57150  | 0.44982  | 0.69319  | 7.17E-20 | 21238   | 0.361 |       |
|                  |              | GCKR        | rs780094-T   | 0.09074      | 0.07072  | 0.11076  | 0.54822  | 0.42728  | 0.66916  | 1.28E-18 | 21238   | 0.366 |       |
|                  |              | LYPLAL1     | rs12137855-C | 0.02190      | -0.00021 | 0.04400  | 0.11486  | -0.00112 | 0.23085  | 0.05418  | 21233   | 0.742 |       |
|                  |              | PNPLA3      | rs738409-G   | 0.01302      | -0.01029 | 0.03633  | 0.01108  | -0.00875 | 0.03090  | 0.27737  | 21233   | 0.230 |       |
|                  |              | TM6SF2      | rs58542926-T | -0.14866     | -0.18919 | -0.10813 | -0.23160 | -0.29475 | -0.16846 | 1.03E-12 | 21233   | 0.063 |       |
|                  |              | NCAN        | rs2228603-T  | -0.13013     | -0.17006 | -0.09021 | -0.20274 | -0.26495 | -0.14054 | 2.41E-10 | 21238   | 0.067 |       |
|                  | M.VLDL.FC    | GCKR        | rs1260326-T  | 0.09897      | 0.07884  | 0.11910  | 0.59795  | 0.47633  | 0.71956  | 1.38E-21 | 21240   | 0.361 |       |
|                  |              | GCKR        | rs780094-T   | 0.09414      | 0.07414  | 0.11415  | 0.56878  | 0.44791  | 0.68965  | 6.64E-20 | 21240   | 0.366 |       |
|                  |              | LYPLAL1     | rs12137855-C | 0.03058      | 0.00847  | 0.05269  | 0.16041  | 0.04441  | 0.27642  | 0.00725  | 21235   | 0.742 |       |
|                  |              | PNPLA3      | rs738409-G   | 0.02161      | -0.00170 | 0.04492  | 0.01838  | -0.00144 | 0.03821  | 0.07176  | 21235   | 0.230 |       |
|                  |              | TM6SF2      | rs58542926-T | -0.15745     | -0.19797 | -0.11692 | -0.24530 | -0.30844 | -0.18216 | 4.70E-14 | 21235   | 0.063 |       |
|                  |              | NCAN        | rs2228603-T  | -0.14119     | -0.18110 | -0.10128 | -0.21997 | -0.28215 | -0.15779 | 6.62E-12 | 21240   | 0.067 |       |
|                  | S.VLDL.FC    | GCKR        | rs1260326-T  | 0.08667      | 0.06670  | 0.10664  | 0.52365  | 0.40299  | 0.64430  | 4.51E-17 | 21559   | 0.361 |       |
|                  |              | GCKR        | rs780094-T   | 0.08080      | 0.06095  | 0.10065  | 0.48817  | 0.36826  | 0.60809  | 3.32E-15 | 21559   | 0.367 |       |
|                  |              | LYPLAL1     | rs12137855-C | 0.02052      | -0.00142 | 0.04246  | 0.10765  | -0.00745 | 0.22275  | 0.07009  | 21554   | 0.742 |       |
|                  |              | PNPLA3      | rs738409-G   | 0.01769      | -0.00546 | 0.04084  | 0.01505  | -0.00464 | 0.03474  | 0.13882  | 21554   | 0.230 |       |
|                  |              | TM6SF2      | rs58542926-T | -0.15118     | -0.19144 | -0.11092 | -0.23553 | -0.29826 | -0.17281 | 3.69E-13 | 21554   | 0.063 |       |
|                  |              | NCAN        | rs2228603-T  | -0.13923     | -0.17881 | -0.09964 | -0.21691 | -0.27858 | -0.15524 | 1.00E-11 | 21559   | 0.067 |       |
|                  | IDL.FC       | GCKR        | rs1260326-T  | 0.02207      | 0.00203  | 0.04210  | 0.13332  | 0.01227  | 0.25437  | 0.03303  | 21559   | 0.361 |       |
|                  |              | GCKR        | rs780094-T   | 0.02060      | 0.00069  | 0.04051  | 0.12445  | 0.00418  | 0.24473  | 0.04519  | 21559   | 0.367 |       |
|                  |              | LYPLAL1     | rs12137855-C | 0.00830      | -0.01367 | 0.03027  | 0.04354  | -0.07170 | 0.15877  | 0.46450  | 21554   | 0.742 |       |
|                  |              | PNPLA3      | rs738409-G   | 0.01769      | -0.00550 | 0.04087  | 0.01504  | -0.00468 | 0.03476  | 0.13970  | 21554   | 0.230 |       |
|                  |              | TM6SF2      | rs58542926-T | -0.09063     | -0.13098 | -0.05029 | -0.14121 | -0.20406 | -0.07835 | 1.38E-05 | 21554   | 0.063 |       |

|                    |           |         |              |          |          |          |          |          |          |          |       |       |
|--------------------|-----------|---------|--------------|----------|----------|----------|----------|----------|----------|----------|-------|-------|
|                    |           | NCAN    | rs2228603-T  | -0.08363 | -0.12329 | -0.04397 | -0.13030 | -0.19209 | -0.06851 | 4.50E-05 | 21559 | 0.067 |
|                    | L.LDL.FC  | GCKR    | rs1260326-T  | 0.02107  | 0.00105  | 0.04108  | 0.12727  | 0.00635  | 0.24819  | 0.04202  | 21555 | 0.361 |
|                    |           | GCKR    | rs780094-T   | 0.01683  | -0.00306 | 0.03672  | 0.10169  | -0.01846 | 0.22184  | 0.10202  | 21555 | 0.367 |
|                    |           | LYPLAL1 | rs12137855-C | 0.00985  | -0.01209 | 0.03179  | 0.05168  | -0.06342 | 0.16678  | 0.38563  | 21550 | 0.742 |
|                    |           | PNPLA3  | rs738409-G   | 0.00853  | -0.01463 | 0.03168  | 0.00725  | -0.01244 | 0.02695  | 0.47687  | 21550 | 0.230 |
|                    |           | TM6SF2  | rs58542926-T | -0.07956 | -0.11987 | -0.03924 | -0.12395 | -0.18675 | -0.06114 | 0.00014  | 21550 | 0.063 |
|                    |           | NCAN    | rs2228603-T  | -0.06723 | -0.10686 | -0.02759 | -0.10474 | -0.16649 | -0.04298 | 0.00106  | 21555 | 0.067 |
|                    | XL.HDL.FC | GCKR    | rs1260326-T  | -0.02046 | -0.04048 | -0.00043 | -0.12359 | -0.24459 | -0.00259 | 0.04562  | 21542 | 0.361 |
|                    |           | GCKR    | rs780094-T   | -0.01582 | -0.03572 | 0.00408  | -0.09559 | -0.21582 | 0.02464  | 0.11971  | 21542 | 0.367 |
|                    |           | LYPLAL1 | rs12137855-C | -0.00751 | -0.02949 | 0.01448  | -0.03938 | -0.15471 | 0.07594  | 0.50396  | 21537 | 0.742 |
|                    |           | PNPLA3  | rs738409-G   | -0.01911 | -0.04230 | 0.00407  | -0.01626 | -0.03598 | 0.00346  | 0.10666  | 21537 | 0.230 |
|                    |           | TM6SF2  | rs58542926-T | 0.01468  | -0.02569 | 0.05504  | 0.02287  | -0.04002 | 0.08576  | 0.47667  | 21537 | 0.063 |
|                    |           | NCAN    | rs2228603-T  | 0.02499  | -0.01467 | 0.06466  | 0.03893  | -0.02286 | 0.10073  | 0.21753  | 21542 | 0.067 |
|                    | L.HDL.FC  | GCKR    | rs1260326-T  | -0.04084 | -0.06086 | -0.02081 | -0.24673 | -0.36773 | -0.12573 | 7.60E-05 | 21559 | 0.361 |
|                    |           | GCKR    | rs780094-T   | -0.03551 | -0.05541 | -0.01561 | -0.21454 | -0.33478 | -0.09429 | 0.00054  | 21559 | 0.367 |
|                    |           | LYPLAL1 | rs12137855-C | -0.00970 | -0.03166 | 0.01227  | -0.05086 | -0.16610 | 0.06438  | 0.39148  | 21554 | 0.742 |
|                    |           | PNPLA3  | rs738409-G   | -0.00278 | -0.02594 | 0.02039  | -0.00236 | -0.02207 | 0.01734  | 0.81603  | 21554 | 0.230 |
|                    |           | TM6SF2  | rs58542926-T | 0.04512  | 0.00481  | 0.08543  | 0.07029  | 0.00749  | 0.13310  | 0.02980  | 21554 | 0.063 |
|                    |           | NCAN    | rs2228603-T  | 0.05246  | 0.01281  | 0.09211  | 0.08173  | 0.01995  | 0.14351  | 0.01023  | 21559 | 0.067 |
|                    | M.HDL.FC  | GCKR    | rs1260326-T  | 0.03335  | 0.01334  | 0.05337  | 0.20152  | 0.08059  | 0.32245  | 0.00121  | 21559 | 0.361 |
|                    |           | GCKR    | rs780094-T   | 0.02999  | 0.01010  | 0.04988  | 0.18117  | 0.06100  | 0.30134  | 0.00340  | 21559 | 0.367 |
|                    |           | LYPLAL1 | rs12137855-C | 0.01176  | -0.01016 | 0.03369  | 0.06170  | -0.05331 | 0.17672  | 0.29707  | 21554 | 0.742 |
|                    |           | PNPLA3  | rs738409-G   | 0.00377  | -0.01937 | 0.02690  | 0.00320  | -0.01648 | 0.02288  | 0.75177  | 21554 | 0.230 |
|                    |           | TM6SF2  | rs58542926-T | -0.04778 | -0.08806 | -0.00749 | -0.07443 | -0.13720 | -0.01166 | 0.02120  | 21554 | 0.063 |
|                    |           | NCAN    | rs2228603-T  | -0.02867 | -0.06828 | 0.01094  | -0.04467 | -0.10637 | 0.01704  | 0.15946  | 21559 | 0.067 |
| Cholesterol esters | L.VLDL.CE | GCKR    | rs1260326-T  | 0.08299  | 0.06197  | 0.10400  | 0.50138  | 0.37441  | 0.62835  | 2.08E-14 | 18960 | 0.363 |
|                    |           | GCKR    | rs780094-T   | 0.08013  | 0.05922  | 0.10104  | 0.48414  | 0.35779  | 0.61049  | 1.18E-13 | 18960 | 0.369 |
|                    |           | LYPLAL1 | rs12137855-C | 0.02259  | -0.00032 | 0.04550  | 0.11853  | -0.00166 | 0.23872  | 0.05601  | 18955 | 0.733 |
|                    |           | PNPLA3  | rs738409-G   | 0.01753  | -0.00669 | 0.04176  | 0.01492  | -0.00569 | 0.03552  | 0.16069  | 18955 | 0.231 |
|                    |           | TM6SF2  | rs58542926-T | -0.14183 | -0.18333 | -0.10032 | -0.22096 | -0.28563 | -0.15630 | 3.69E-11 | 18955 | 0.063 |
|                    |           | NCAN    | rs2228603-T  | -0.12998 | -0.17069 | -0.08926 | -0.20250 | -0.26593 | -0.13907 | 6.35E-10 | 18960 | 0.068 |
|                    | M.VLDL.CE | GCKR    | rs1260326-T  | 0.08846  | 0.06764  | 0.10928  | 0.53444  | 0.40865  | 0.66022  | 2.16E-16 | 19273 | 0.363 |
|                    |           | GCKR    | rs780094-T   | 0.08337  | 0.06266  | 0.10409  | 0.50373  | 0.37856  | 0.62889  | 7.30E-15 | 19273 | 0.370 |
|                    |           | LYPLAL1 | rs12137855-C | 0.02254  | -0.00020 | 0.04529  | 0.11827  | -0.00106 | 0.23759  | 0.05522  | 19268 | 0.732 |
|                    |           | PNPLA3  | rs738409-G   | 0.01770  | -0.00638 | 0.04178  | 0.01505  | -0.00543 | 0.03554  | 0.15510  | 19268 | 0.231 |
|                    |           | TM6SF2  | rs58542926-T | -0.17301 | -0.21425 | -0.13177 | -0.26954 | -0.33379 | -0.20529 | 5.10E-16 | 19268 | 0.063 |
|                    |           | NCAN    | rs2228603-T  | -0.15354 | -0.19387 | -0.11320 | -0.23921 | -0.30205 | -0.17637 | 1.87E-13 | 19273 | 0.068 |
|                    | L.LDL.CE  | GCKR    | rs1260326-T  | 0.04675  | 0.02590  | 0.06760  | 0.28242  | 0.15645  | 0.40840  | 1.55E-05 | 19273 | 0.363 |
|                    |           | GCKR    | rs780094-T   | 0.04085  | 0.02011  | 0.06160  | 0.24682  | 0.12149  | 0.37216  | 0.00015  | 19273 | 0.370 |
|                    |           | LYPLAL1 | rs12137855-C | 0.00948  | -0.01326 | 0.03221  | 0.04971  | -0.06955 | 0.16897  | 0.42146  | 19268 | 0.732 |
|                    |           | PNPLA3  | rs738409-G   | 0.00967  | -0.01440 | 0.03374  | 0.00823  | -0.01225 | 0.02870  | 0.43832  | 19268 | 0.231 |

|               |           |         |              |          |          |          |          |          |          |          |       |       |
|---------------|-----------|---------|--------------|----------|----------|----------|----------|----------|----------|----------|-------|-------|
|               |           | TM6SF2  | rs58542926-T | -0.09421 | -0.13548 | -0.05294 | -0.14677 | -0.21107 | -0.08248 | 1.08E-05 | 19268 | 0.063 |
|               |           | NCAN    | rs2228603-T  | -0.08057 | -0.12093 | -0.04020 | -0.12552 | -0.18841 | -0.06263 | 0.00012  | 19273 | 0.068 |
|               | M.LDL.CE  | GCKR    | rs1260326-T  | 0.05189  | 0.03105  | 0.07273  | 0.31351  | 0.18758  | 0.43943  | 1.60E-06 | 19273 | 0.363 |
|               |           | GCKR    | rs780094-T   | 0.04511  | 0.02437  | 0.06585  | 0.27255  | 0.14725  | 0.39785  | 2.76E-05 | 19273 | 0.370 |
|               |           | LYPLAL1 | rs12137855-C | 0.01139  | -0.01135 | 0.03412  | 0.05974  | -0.05952 | 0.17899  | 0.33401  | 19268 | 0.732 |
|               |           | PNPLA3  | rs738409-G   | 0.00781  | -0.01626 | 0.03189  | 0.00665  | -0.01383 | 0.02712  | 0.53140  | 19268 | 0.231 |
|               |           | TM6SF2  | rs58542926-T | -0.09374 | -0.13502 | -0.05247 | -0.14605 | -0.21035 | -0.08174 | 1.20E-05 | 19268 | 0.063 |
|               |           | NCAN    | rs2228603-T  | -0.07840 | -0.11876 | -0.03805 | -0.12215 | -0.18502 | -0.05927 | 0.00018  | 19273 | 0.068 |
|               | XL.HDL.CE | GCKR    | rs1260326-T  | -0.00525 | -0.02611 | 0.01561  | -0.03171 | -0.15776 | 0.09433  | 0.62279  | 19273 | 0.363 |
|               |           | GCKR    | rs780094-T   | -0.00188 | -0.02264 | 0.01888  | -0.01136 | -0.13677 | 0.11404  | 0.85937  | 19273 | 0.370 |
|               |           | LYPLAL1 | rs12137855-C | 0.00067  | -0.02208 | 0.02343  | 0.00353  | -0.11586 | 0.12292  | 0.95386  | 19268 | 0.732 |
|               |           | PNPLA3  | rs738409-G   | -0.02384 | -0.04792 | 0.00024  | -0.02028 | -0.04076 | 0.00021  | 0.05297  | 19268 | 0.231 |
|               |           | TM6SF2  | rs58542926-T | -0.01226 | -0.05358 | 0.02906  | -0.01910 | -0.08348 | 0.04528  | 0.56188  | 19268 | 0.063 |
|               |           | NCAN    | rs2228603-T  | -0.00674 | -0.04714 | 0.03367  | -0.01050 | -0.07344 | 0.05245  | 0.74442  | 19273 | 0.068 |
|               | L.HDL.CE  | GCKR    | rs1260326-T  | -0.02956 | -0.05046 | -0.00866 | -0.17859 | -0.30484 | -0.05235 | 0.00615  | 19273 | 0.363 |
|               |           | GCKR    | rs780094-T   | -0.02467 | -0.04546 | -0.00388 | -0.14903 | -0.27464 | -0.02341 | 0.02155  | 19273 | 0.370 |
|               |           | LYPLAL1 | rs12137855-C | -0.00760 | -0.03037 | 0.01517  | -0.03987 | -0.15934 | 0.07960  | 0.51792  | 19268 | 0.732 |
|               |           | PNPLA3  | rs738409-G   | -0.00681 | -0.03091 | 0.01728  | -0.00579 | -0.02629 | 0.01470  | 0.58392  | 19268 | 0.231 |
|               |           | TM6SF2  | rs58542926-T | 0.03923  | -0.00210 | 0.08056  | 0.06112  | -0.00327 | 0.12552  | 0.06593  | 19268 | 0.063 |
|               |           | NCAN    | rs2228603-T  | 0.03973  | -0.00072 | 0.08018  | 0.06190  | -0.00113 | 0.12492  | 0.05709  | 19273 | 0.068 |
|               | M.HDL.CE  | GCKR    | rs1260326-T  | 0.03270  | 0.01186  | 0.05355  | 0.19758  | 0.07166  | 0.32351  | 0.00232  | 19273 | 0.363 |
|               |           | GCKR    | rs780094-T   | 0.02955  | 0.00881  | 0.05028  | 0.17850  | 0.05321  | 0.30380  | 0.00568  | 19273 | 0.370 |
|               |           | LYPLAL1 | rs12137855-C | 0.00580  | -0.01691 | 0.02851  | 0.03045  | -0.08868 | 0.14958  | 0.61973  | 19268 | 0.732 |
|               |           | PNPLA3  | rs738409-G   | 0.00352  | -0.02052 | 0.02756  | 0.00299  | -0.01745 | 0.02344  | 0.77611  | 19268 | 0.231 |
|               |           | TM6SF2  | rs58542926-T | -0.01536 | -0.05660 | 0.02589  | -0.02393 | -0.08819 | 0.04033  | 0.46963  | 19268 | 0.063 |
|               |           | NCAN    | rs2228603-T  | -0.00564 | -0.04599 | 0.03472  | -0.00878 | -0.07166 | 0.05409  | 0.78618  | 19273 | 0.068 |
| Fluid balance | Alb       | GCKR    | rs1260326-T  | 0.02966  | 0.00853  | 0.05079  | 0.17921  | 0.05154  | 0.30688  | 0.00652  | 18960 | 0.363 |
|               |           | GCKR    | rs780094-T   | 0.02451  | 0.00348  | 0.04553  | 0.14807  | 0.02103  | 0.27511  | 0.02387  | 18960 | 0.369 |
|               |           | LYPLAL1 | rs12137855-C | 0.00730  | -0.01572 | 0.03032  | 0.03830  | -0.08246 | 0.15907  | 0.53868  | 18955 | 0.733 |
|               |           | PNPLA3  | rs738409-G   | 0.01089  | -0.01347 | 0.03525  | 0.00926  | -0.01146 | 0.02998  | 0.38621  | 18955 | 0.231 |
|               |           | TM6SF2  | rs58542926-T | -0.01979 | -0.06160 | 0.02202  | -0.03084 | -0.09598 | 0.03430  | 0.35874  | 18955 | 0.063 |
|               |           | NCAN    | rs2228603-T  | -0.01331 | -0.05422 | 0.02761  | -0.02073 | -0.08448 | 0.04301  | 0.52842  | 18960 | 0.068 |
|               | Crea      | GCKR    | rs1260326-T  | -0.02640 | -0.04603 | -0.00677 | -0.15949 | -0.27808 | -0.04091 | 0.00851  | 22583 | 0.361 |
|               |           | GCKR    | rs780094-T   | -0.02413 | -0.04366 | -0.00461 | -0.14581 | -0.26379 | -0.02783 | 0.01561  | 22583 | 0.366 |
|               |           | LYPLAL1 | rs12137855-C | -0.00443 | -0.02531 | 0.01644  | -0.02326 | -0.13275 | 0.08622  | 0.67759  | 24805 | 0.751 |
|               |           | PNPLA3  | rs738409-G   | 0.01129  | -0.01146 | 0.03404  | 0.00960  | -0.00975 | 0.02895  | 0.33154  | 22578 | 0.227 |
|               |           | TM6SF2  | rs58542926-T | -0.00736 | -0.04573 | 0.03102  | -0.01146 | -0.07124 | 0.04832  | 0.70760  | 23613 | 0.064 |
|               |           | NCAN    | rs2228603-T  | -0.00288 | -0.04094 | 0.03519  | -0.00448 | -0.06378 | 0.05483  | 0.88249  | 23618 | 0.067 |
|               | Urea      | GCKR    | rs1260326-T  | 0.01305  | -0.00803 | 0.03412  | 0.07881  | -0.04854 | 0.20617  | 0.22512  | 18813 | 0.363 |
|               |           | GCKR    | rs780094-T   | 0.01131  | -0.00966 | 0.03227  | 0.06830  | -0.05833 | 0.19494  | 0.29046  | 18814 | 0.370 |
|               |           | LYPLAL1 | rs12137855-C | -0.01113 | -0.03412 | 0.01186  | -0.05839 | -0.17901 | 0.06223  | 0.34266  | 18810 | 0.732 |

|              |    |         |              |          |          |          |          |          |          |          |       |       |
|--------------|----|---------|--------------|----------|----------|----------|----------|----------|----------|----------|-------|-------|
|              |    | PNPLA3  | rs738409-G   | -0.00594 | -0.03025 | 0.01838  | -0.00505 | -0.02573 | 0.01563  | 0.63216  | 18811 | 0.231 |
|              |    | TM6SF2  | rs58542926-T | -0.03201 | -0.07381 | 0.00978  | -0.04988 | -0.11499 | 0.01524  | 0.13324  | 18809 | 0.063 |
|              |    | NCAN    | rs2228603-T  | -0.02487 | -0.06566 | 0.01592  | -0.03874 | -0.10229 | 0.02481  | 0.23209  | 18813 | 0.068 |
| Inflammation | Gp | GCKR    | rs1260326-T  | 0.08716  | 0.06635  | 0.10798  | 0.52662  | 0.40088  | 0.65237  | 5.24E-16 | 19270 | 0.363 |
|              |    | GCKR    | rs780094-T   | 0.07988  | 0.05917  | 0.10059  | 0.48263  | 0.35750  | 0.60776  | 8.32E-14 | 19270 | 0.369 |
|              |    | LYPLAL1 | rs12137855-C | 0.02229  | -0.00043 | 0.04501  | 0.11695  | -0.00224 | 0.23614  | 0.05739  | 19265 | 0.732 |
|              |    | PNPLA3  | rs738409-G   | 0.00347  | -0.02058 | 0.02752  | 0.00295  | -0.01751 | 0.02341  | 0.78006  | 19265 | 0.231 |
|              |    | TM6SF2  | rs58542926-T | -0.08366 | -0.12492 | -0.04240 | -0.13034 | -0.19462 | -0.06606 | 8.67E-05 | 19265 | 0.063 |
|              |    | NCAN    | rs2228603-T  | -0.07566 | -0.11604 | -0.03529 | -0.11788 | -0.18078 | -0.05497 | 0.00029  | 19270 | 0.068 |
